# Supplementary material for: Venomics Approach Reveals a High Proportion of Lactrodectus-Like Toxins in the Venom of the Noble False Widow Spider Steatoda nobilis
Source: MDPI journal article supplement (doi:10.3390/toxins12060402), 2020-06-18
Supplement: s1 [file s1]

**Supplementary dataset 2 – Table1- Latroductins:** Sequence alignments of the closest five latroductins already published and the five most concentrated ones in the venom of *Steatoda nobilis*. Bold-italics positions indicate the signal peptide. Yellow windows indicate positions where at least 50% of the identity and/or the physico-chemical properties of the aminoacids are maintained, bold positions are the ones where 33 to 50% of the aminoacids are conserved. Cysteines are highlighted in red.

| IDENTIFICATION         | SPECIES                    | REF        | 1        | 2        | 3        | 4        | 5        | 6        | 7        | 8        | 9        | 10       | 11       | 12       | 13       | 14       | 15       | 16       | 17       | 18       | 19       | 20       | 21       | 22       | 23       | 24       | 25       | 26       | 27       | 28       | 29       | 30       | 31       | 32       | 33       | 34       | 35       | 36       | 37       | 38       | 39       | 40       | 41       | 42       | 43       | 44       | 45       | 46       | 47       | 48       | 49       | 50       | 51       | 52       |
|------------------------|----------------------------|------------|----------|----------|----------|----------|----------|----------|----------|----------|----------|----------|----------|----------|----------|----------|----------|----------|----------|----------|----------|----------|----------|----------|----------|----------|----------|----------|----------|----------|----------|----------|----------|----------|----------|----------|----------|----------|----------|----------|----------|----------|----------|----------|----------|----------|----------|----------|----------|----------|----------|----------|----------|----------|
| Latroductin V9QFH8     | <i>S. grossa</i>           | [1]        | <b>M</b> | <b>F</b> | <b>K</b> | <b>L</b> | <b>I</b> | <b>C</b> | -        | <b>I</b> | <b>V</b> | <b>F</b> | <b>I</b> | <b>A</b> | <b>T</b> | <b>I</b> | <b>L</b> | <b>S</b> | <b>I</b> | <b>T</b> | <b>S</b> | <b>A</b> | <b>A</b> | <b>D</b> | <b>N</b> | <b>E</b> | <b>D</b> | <b>E</b> | <b>L</b> | <b>T</b> | <b>I</b> | <b>E</b> | <b>D</b> | <b>F</b> | <b>L</b> | <b>S</b> | <b>Y</b> | <b>E</b> | <b>C</b> | <b>N</b> | <b>E</b> | <b>S</b> | <b>M</b> | <b>D</b> | <b>I</b> | <b>E</b> | <b>E</b> | <b>L</b> | <b>K</b> | <b>E</b> | <b>K</b> | <b>D</b> | <b>K</b> | <b>V</b> |
| Latroductin AHC13269   | <i>S. grossa</i>           | [1]        | <b>M</b> | <b>F</b> | <b>K</b> | <b>L</b> | <b>I</b> | <b>C</b> | -        | <b>I</b> | <b>V</b> | <b>F</b> | <b>I</b> | <b>A</b> | <b>T</b> | <b>I</b> | <b>L</b> | <b>S</b> | <b>I</b> | <b>T</b> | <b>S</b> | <b>A</b> | <b>A</b> | <b>D</b> | <b>N</b> | <b>E</b> | <b>D</b> | <b>E</b> | <b>L</b> | <b>T</b> | <b>M</b> | <b>E</b> | <b>D</b> | <b>F</b> | <b>L</b> | <b>S</b> | <b>Y</b> | <b>E</b> | <b>C</b> | <b>N</b> | <b>E</b> | <b>S</b> | <b>M</b> | <b>D</b> | <b>I</b> | <b>E</b> | <b>E</b> | <b>L</b> | <b>K</b> | <b>E</b> | <b>K</b> | <b>D</b> | <b>K</b> | <b>V</b> |
| Latroductin-2 V9QFG7   | <i>L. geometricus</i>      | [1]        | <b>M</b> | <b>L</b> | <b>K</b> | <b>L</b> | <b>I</b> | <b>C</b> | -        | <b>I</b> | <b>V</b> | <b>F</b> | <b>L</b> | <b>V</b> | <b>T</b> | <b>V</b> | <b>L</b> | <b>T</b> | <b>F</b> | <b>V</b> | <b>V</b> | <b>G</b> | <b>E</b> | <b>D</b> | <b>T</b> | <b>L</b> | -        | -        | -        | -        | -        | -        | <b>D</b> | <b>P</b> | <b>A</b> | <b>E</b> | <b>Y</b> | <b>G</b> | <b>C</b> | <b>P</b> | <b>S</b> | <b>D</b> | <b>V</b> | <b>D</b> | <b>M</b> | <b>A</b> | <b>E</b> | <b>L</b> | <b>T</b> | <b>E</b> | <b>K</b> | <b>N</b> | <b>E</b> | <b>V</b> |
| Latroductin-2 Q4U4N3   | <i>L. tredecimguttatus</i> | [2]        | <b>M</b> | <b>L</b> | <b>K</b> | <b>L</b> | <b>I</b> | <b>C</b> | -        | <b>I</b> | <b>A</b> | <b>F</b> | <b>L</b> | <b>V</b> | <b>T</b> | <b>V</b> | <b>L</b> | <b>T</b> | <b>L</b> | <b>V</b> | <b>A</b> | <b>G</b> | <b>Q</b> | <b>D</b> | <b>S</b> | <b>L</b> | -        | -        | -        | -        | -        | -        | <b>D</b> | <b>P</b> | <b>A</b> | <b>E</b> | <b>F</b> | <b>G</b> | <b>C</b> | <b>A</b> | <b>D</b> | <b>D</b> | <b>V</b> | <b>N</b> | <b>Q</b> | <b>A</b> | <b>E</b> | <b>L</b> | <b>L</b> | <b>K</b> | <b>N</b> | <b>D</b> | <b>I</b> |          |
| Latroductin-2 AHC13255 | <i>L. hesperus</i>         | [1]        | <b>M</b> | <b>L</b> | <b>K</b> | <b>L</b> | <b>I</b> | <b>C</b> | -        | <b>I</b> | <b>A</b> | <b>F</b> | <b>L</b> | <b>V</b> | <b>T</b> | <b>V</b> | <b>L</b> | <b>T</b> | <b>L</b> | <b>V</b> | <b>A</b> | <b>G</b> | <b>E</b> | <b>D</b> | <b>S</b> | <b>L</b> | -        | -        | -        | -        | -        | -        | <b>D</b> | <b>P</b> | <b>A</b> | <b>E</b> | <b>Y</b> | <b>G</b> | <b>C</b> | <b>A</b> | <b>D</b> | <b>D</b> | <b>I</b> | <b>N</b> | <b>Q</b> | <b>E</b> | <b>E</b> | <b>L</b> | <b>L</b> | <b>K</b> | <b>K</b> | <b>N</b> | <b>D</b> | <b>V</b> |
| Latroductin-2 V9QE17   | <i>L. hesperus</i>         | [1]        | <b>M</b> | <b>L</b> | <b>K</b> | <b>L</b> | <b>I</b> | <b>C</b> | -        | <b>I</b> | <b>A</b> | <b>F</b> | <b>L</b> | <b>V</b> | <b>T</b> | <b>V</b> | <b>L</b> | <b>T</b> | <b>L</b> | <b>V</b> | <b>A</b> | <b>G</b> | <b>E</b> | <b>D</b> | <b>S</b> | <b>L</b> | -        | -        | -        | -        | -        | -        | <b>D</b> | <b>P</b> | <b>A</b> | <b>E</b> | <b>Y</b> | <b>G</b> | <b>C</b> | <b>A</b> | <b>D</b> | <b>D</b> | <b>I</b> | <b>N</b> | <b>Q</b> | <b>E</b> | <b>D</b> | <b>L</b> | <b>L</b> | <b>K</b> | <b>K</b> | <b>N</b> | <b>D</b> | <b>V</b> |
| Latroductin-Sno1a      | <i>S. nobilis</i>          | This study | <b>M</b> | <b>F</b> | <b>K</b> | <b>L</b> | <b>I</b> | <b>W</b> | <b>T</b> | <b>V</b> | <b>V</b> | <b>F</b> | <b>L</b> | <b>A</b> | <b>I</b> | <b>I</b> | <b>L</b> | <b>S</b> | <b>F</b> | <b>T</b> | <b>S</b> | <b>A</b> | <b>T</b> | <b>D</b> | <b>D</b> | <b>D</b> | <b>K</b> | <b>A</b> | <b>V</b> | <b>N</b> | <b>V</b> | <b>A</b> | <b>D</b> | <b>F</b> | <b>G</b> | <b>N</b> | <b>Y</b> | <b>G</b> | <b>C</b> | <b>D</b> | <b>D</b> | <b>N</b> | <b>M</b> | <b>D</b> | <b>I</b> | <b>G</b> | <b>E</b> | <b>F</b> | <b>K</b> | <b>E</b> | <b>K</b> | <b>D</b> | <b>A</b> | <b>T</b> |
| Latroductin-Sno1b      | <i>S. nobilis</i>          | This study | <b>M</b> | <b>G</b> | <b>K</b> | <b>L</b> | <b>H</b> | <b>F</b> | -        | -        | -        | -        | <b>L</b> | <b>I</b> | <b>L</b> | <b>L</b> | <b>S</b> | <b>V</b> | <b>I</b> | <b>V</b> | <b>S</b> | -        | -        | -        | -        | -        | -        | -        | <b>V</b> | <b>F</b> | <b>C</b> | <b>I</b> | <b>E</b> | <b>P</b> | <b>E</b> | <b>D</b> | <b>I</b> | <b>G</b> | <b>C</b> | <b>Q</b> | -        | <b>G</b> | <b>I</b> | <b>S</b> | <b>R</b> | <b>E</b> | <b>E</b> | <b>F</b> | <b>D</b> | <b>K</b> | <b>K</b> | <b>D</b> | <b>A</b> | <b>E</b> |
| Latroductin-Sno1c      | <i>S. nobilis</i>          | This study | <b>M</b> | <b>N</b> | <b>T</b> | <b>L</b> | <b>H</b> | <b>F</b> | -        | -        | -        | -        | <b>L</b> | <b>I</b> | <b>L</b> | <b>L</b> | <b>M</b> | <b>S</b> | <b>V</b> | <b>V</b> | <b>S</b> | -        | -        | -        | -        | -        | -        | -        | <b>V</b> | <b>F</b> | <b>C</b> | <b>I</b> | <b>S</b> | <b>P</b> | <b>A</b> | <b>D</b> | <b>I</b> | <b>G</b> | <b>C</b> | <b>T</b> | -        | <b>D</b> | <b>I</b> | <b>S</b> | <b>Q</b> | <b>E</b> | <b>E</b> | <b>F</b> | <b>D</b> | <b>E</b> | <b>K</b> | <b>D</b> | <b>S</b> | <b>K</b> |
| Latroductin-Sno1d      | <i>S. nobilis</i>          | This study | -        | -        | -        | -        | -        | -        | -        | -        | -        | -        | -        | -        | -        | -        | -        | -        | -        | <b>T</b> | <b>S</b> | <b>A</b> | <b>T</b> | <b>D</b> | <b>D</b> | <b>D</b> | <b>E</b> | <b>A</b> | <b>V</b> | <b>N</b> | <b>V</b> | <b>A</b> | <b>D</b> | <b>F</b> | <b>G</b> | <b>N</b> | <b>F</b> | <b>G</b> | <b>C</b> | <b>E</b> | <b>N</b> | <b>N</b> | <b>M</b> | <b>D</b> | <b>I</b> | <b>G</b> | <b>E</b> | <b>F</b> | <b>K</b> | <b>E</b> | <b>K</b> | <b>D</b> | <b>T</b> | <b>A</b> |
| Latroductin-Sno1e      | <i>S. nobilis</i>          | This study | <b>M</b> | <b>F</b> | <b>K</b> | <b>L</b> | <b>I</b> | <b>C</b> | -        | <b>I</b> | <b>V</b> | <b>F</b> | <b>L</b> | <b>A</b> | <b>T</b> | <b>I</b> | <b>L</b> | <b>S</b> | <b>I</b> | <b>T</b> | <b>S</b> | <b>A</b> | <b>T</b> | -        | <b>E</b> | <b>D</b> | <b>D</b> | <b>S</b> | <b>L</b> | <b>T</b> | <b>I</b> | <b>D</b> | <b>D</b> | <b>F</b> | <b>L</b> | <b>S</b> | <b>H</b> | <b>G</b> | <b>C</b> | <b>D</b> | <b>E</b> | <b>S</b> | <b>M</b> | <b>D</b> | <b>I</b> | <b>E</b> | <b>E</b> | <b>L</b> | <b>K</b> | <b>Q</b> | <b>K</b> | <b>D</b> | <b>N</b> | <b>V</b> |
| Latroductin-Sno1f      | <i>S. nobilis</i>          | This study | <b>M</b> | <b>F</b> | <b>K</b> | <b>L</b> | <b>I</b> | <b>C</b> | -        | <b>I</b> | <b>V</b> | <b>F</b> | <b>L</b> | <b>A</b> | <b>T</b> | <b>I</b> | <b>L</b> | <b>S</b> | <b>I</b> | <b>T</b> | <b>S</b> | <b>A</b> | <b>T</b> | -        | <b>E</b> | <b>D</b> | <b>D</b> | <b>S</b> | <b>L</b> | <b>T</b> | <b>I</b> | <b>D</b> | <b>D</b> | <b>F</b> | <b>L</b> | <b>S</b> | <b>H</b> | <b>G</b> | <b>C</b> | <b>D</b> | <b>E</b> | <b>S</b> | <b>M</b> | <b>D</b> | <b>I</b> | <b>E</b> | <b>E</b> | <b>L</b> | <b>K</b> | <b>Q</b> | <b>K</b> | <b>D</b> | <b>N</b> | <b>V</b> |

| IDENTIFICATION         | SPECIES                    | REF        | 53       | 54       | 55       | 56       | 57       | 58       | 59       | 60       | 61       | 62       | 63       | 64       | 65       | 66       | 67       | 68       | 69       | 70       | 71       | 72       | 73       | 74       | 75       | 76       | 77       | 78       | 79       | 80       | 81       | 82       | 83       | 84       | 85       | 86       | 87       | 88       | 89       | 90       | 91       | 92       | 93       | 94       | 95       | 96       | 97       | 98       | 99       | 100      | 101      | 102      | 103 |
|------------------------|----------------------------|------------|----------|----------|----------|----------|----------|----------|----------|----------|----------|----------|----------|----------|----------|----------|----------|----------|----------|----------|----------|----------|----------|----------|----------|----------|----------|----------|----------|----------|----------|----------|----------|----------|----------|----------|----------|----------|----------|----------|----------|----------|----------|----------|----------|----------|----------|----------|----------|----------|----------|----------|-----|
| Latroductin V9QFH8     | <i>S. grossa</i>           | [1]        | <b>C</b> | <b>S</b> | <b>R</b> | <b>C</b> | <b>A</b> | <b>N</b> | <b>L</b> | <b>H</b> | <b>K</b> | <b>T</b> | <b>Q</b> | <b>S</b> | <b>V</b> | <b>I</b> | <b>E</b> | <b>R</b> | <b>C</b> | <b>R</b> | <b>L</b> | <b>N</b> | <b>C</b> | <b>F</b> | <b>T</b> | <b>S</b> | <b>E</b> | <b>Y</b> | <b>F</b> | <b>K</b> | <b>N</b> | <b>C</b> | <b>E</b> | <b>D</b> | <b>N</b> | <b>L</b> | <b>Q</b> | <b>A</b> | <b>K</b> | <b>E</b> | <b>E</b> | <b>E</b> | <b>P</b> | <b>E</b> | <b>E</b> | <b>E</b> | <b>T</b> | <b>L</b> | -        | -        | -        | -        |     |
| Latroductin AHC13269   | <i>S. grossa</i>           | [1]        | <b>C</b> | <b>S</b> | <b>R</b> | <b>C</b> | <b>A</b> | <b>N</b> | <b>L</b> | <b>H</b> | <b>K</b> | <b>T</b> | <b>Q</b> | <b>S</b> | <b>V</b> | <b>I</b> | <b>E</b> | <b>R</b> | <b>C</b> | <b>R</b> | <b>L</b> | <b>N</b> | <b>C</b> | <b>F</b> | <b>T</b> | <b>S</b> | <b>E</b> | <b>Y</b> | <b>F</b> | <b>K</b> | <b>N</b> | <b>C</b> | <b>E</b> | <b>D</b> | <b>N</b> | <b>L</b> | <b>Q</b> | <b>T</b> | <b>K</b> | <b>E</b> | <b>E</b> | <b>E</b> | <b>P</b> | <b>E</b> | <b>E</b> | <b>E</b> | <b>T</b> | <b>L</b> | -        | -        | -        | -        |     |
| Latroductin-2 V9QFG7   | <i>L. geometricus</i>      | [1]        | <b>C</b> | <b>L</b> | <b>R</b> | <b>C</b> | <b>E</b> | <b>D</b> | <b>F</b> | <b>H</b> | <b>K</b> | <b>E</b> | <b>G</b> | <b>V</b> | <b>A</b> | <b>F</b> | <b>T</b> | <b>L</b> | <b>C</b> | <b>K</b> | <b>T</b> | <b>N</b> | <b>C</b> | <b>F</b> | <b>T</b> | <b>T</b> | <b>E</b> | <b>Y</b> | <b>Y</b> | <b>K</b> | <b>N</b> | <b>C</b> | <b>V</b> | <b>K</b> | <b>D</b> | <b>L</b> | <b>E</b> | <b>E</b> | <b>A</b> | <b>G</b> | <b>K</b> | <b>E</b> | <b>T</b> | <b>E</b> | <b>E</b> | -        | -        | -        | -        | -        |          |          |     |
| Latroductin-2 Q4U4N3   | <i>L. tredecimguttatus</i> | [2]        | <b>C</b> | <b>L</b> | <b>Q</b> | <b>C</b> | <b>E</b> | <b>D</b> | <b>L</b> | <b>H</b> | <b>K</b> | <b>E</b> | <b>G</b> | <b>V</b> | <b>V</b> | <b>F</b> | <b>S</b> | <b>L</b> | <b>C</b> | <b>K</b> | <b>T</b> | <b>N</b> | <b>C</b> | <b>F</b> | <b>T</b> | <b>T</b> | <b>E</b> | <b>Y</b> | <b>F</b> | <b>Q</b> | <b>H</b> | <b>C</b> | <b>V</b> | <b>K</b> | <b>D</b> | <b>L</b> | <b>E</b> | <b>E</b> | <b>A</b> | <b>K</b> | <b>E</b> | <b>P</b> | <b>P</b> | <b>E</b> | -        | -        | -        | -        | -        |          |          |          |     |
| Latroductin-2 AHC13255 | <i>L. hesperus</i>         | [1]        | <b>C</b> | <b>L</b> | <b>Q</b> | <b>C</b> | <b>E</b> | <b>D</b> | <b>L</b> | <b>H</b> | <b>K</b> | <b>E</b> | <b>G</b> | <b>V</b> | <b>V</b> | <b>F</b> | <b>S</b> | <b>L</b> | <b>C</b> | <b>K</b> | <b>T</b> | <b>N</b> | <b>C</b> | <b>F</b> | <b>T</b> | <b>T</b> | <b>Q</b> | <b>Y</b> | <b>F</b> | <b>T</b> | <b>N</b> | <b>C</b> | <b>V</b> | <b>K</b> | <b>D</b> | <b>L</b> | <b>E</b> | <b>E</b> | <b>A</b> | <b>E</b> | <b>K</b> | <b>E</b> | <b>P</b> | <b>P</b> | <b>E</b> | -        | -        | -        | -        | -        |          |          |     |
| Latroductin-2 V9QE17   | <i>L. hesperus</i>         | [1]        | <b>C</b> | <b>L</b> | <b>Q</b> | <b>C</b> | <b>E</b> | <b>D</b> | <b>L</b> | <b>H</b> | <b>K</b> | <b>E</b> | <b>G</b> | <b>V</b> | <b>V</b> | <b>F</b> | <b>S</b> | <b>L</b> | <b>C</b> | <b>K</b> | <b>T</b> | <b>N</b> | <b>C</b> | <b>F</b> | <b>T</b> | <b>T</b> | <b>Q</b> | <b>Y</b> | <b>F</b> | <b>T</b> | <b>N</b> | <b>C</b> | <b>V</b> | <b>K</b> | <b>D</b> | <b>L</b> | <b>E</b> | <b>E</b> | <b>A</b> | <b>E</b> | <b>K</b> | <b>E</b> | <b>P</b> | <b>P</b> | <b>E</b> | -        | -        | -        | -        | -        |          |          |     |
| Latroductin-Sno1a      | <i>S. nobilis</i>          | This study | <b>C</b> | <b>T</b> | <b>E</b> | <b>C</b> | <b>G</b> | <b>Y</b> | <b>L</b> | <b>H</b> | <b>N</b> | <b>A</b> | <b>H</b> | <b>P</b> | <b>A</b> | <b>N</b> | <b>D</b> | <b>M</b> | <b>C</b> | <b>R</b> | <b>S</b> | <b>Q</b> | <b>C</b> | <b>F</b> | <b>K</b> | <b>S</b> | <b>E</b> | <b>Y</b> | <b>F</b> | <b>K</b> | <b>Y</b> | <b>C</b> | <b>Q</b> | <b>D</b> | <b>T</b> | <b>L</b> | <b>Q</b> | <b>G</b> | <b>K</b> | <b>D</b> | <b>K</b> | <b>E</b> | <b>V</b> | <b>E</b> | <b>E</b> | <b>E</b> | <b>T</b> | <b>F</b> | -        | -        | -        | -        |     |
| Latroductin-Sno1b      | <i>S. nobilis</i>          | This study | <b>C</b> | <b>H</b> | <b>Q</b> | <b>C</b> | <b>G</b> | <b>E</b> | <b>D</b> | <b>Y</b> | <b>S</b> | <b>E</b> | <b>T</b> | <b>D</b> | <b>M</b> | <b>I</b> | <b>D</b> | <b>K</b> | <b>C</b> | <b>R</b> | <b>S</b> | <b>N</b> | <b>C</b> | <b>F</b> | <b>S</b> | <b>G</b> | <b>S</b> | <b>F</b> | <b>Y</b> | <b>K</b> | <b>S</b> | <b>C</b> | <b>V</b> | <b>D</b> | <b>L</b> | <b>I</b> | <b>N</b> | <b>K</b> | <b>V</b> | <b>Y</b> | <b>D</b> | <b>E</b> | <b>K</b> | <b>D</b> | <b>A</b> | <b>N</b> | <b>E</b> | <b>K</b> | <b>P</b> | <b>D</b> | <b>W</b> | -        |     |
| Latroductin-Sno1c      | <i>S. nobilis</i>          | This study | <b>C</b> | <b>N</b> | <b>K</b> | <b>C</b> | <b>N</b> | <b>D</b> | <b>G</b> | <b>F</b> | <b>E</b> | <b>D</b> | <b>T</b> | <b>N</b> | <b>M</b> | <b>L</b> | <b>E</b> | <b>R</b> | <b>C</b> | <b>R</b> | <b>A</b> | <b>D</b> | <b>C</b> | <b>F</b> | <b>K</b> | <b>G</b> | <b>K</b> | <b>F</b> | <b>F</b> | <b>R</b> | <b>S</b> | <b>C</b> | <b>V</b> | <b>D</b> | <b>H</b> | <b>L</b> | <b>E</b> | <b>G</b> | <b>I</b> | <b>Y</b> | <b>D</b> | <b>E</b> | <b>K</b> | <b>D</b> | <b>N</b> | <b>V</b> | <b>E</b> | <b>G</b> | <b>P</b> | <b>P</b> | <b>E</b> | <b>M</b> |     |
| Latroductin-Sno1d      | <i>S. nobilis</i>          | This study | <b>C</b> | <b>T</b> | <b>E</b> | <b>C</b> | <b>G</b> | <b>Y</b> | <b>L</b> | <b>H</b> | <b>N</b> | <b>A</b> | <b>H</b> | <b>S</b> | <b>A</b> | <b>N</b> | <b>D</b> | <b>M</b> | <b>C</b> | <b>R</b> | <b>S</b> | <b>Q</b> | <b>C</b> | <b>F</b> | <b>K</b> | <b>S</b> | <b>E</b> | <b>Y</b> | <b>F</b> | <b>K</b> | <b>Y</b> | <b>C</b> | <b>Q</b> | <b>D</b> | <b>T</b> | <b>L</b> | <b>Q</b> | <b>G</b> | <b>K</b> | <b>D</b> | -        | -        | -        | -        | -        | -        | -        | -        | -        | -        | -        |          |     |
| Latroductin-Sno1e      | <i>S. nobilis</i>          | This study | <b>C</b> | <b>S</b> | <b>R</b> | <b>C</b> | <b>G</b> | <b>Y</b> | <b>L</b> | <b>H</b> | <b>S</b> | <b>A</b> | <b>Y</b> | <b>S</b> | <b>A</b> | <b>N</b> | <b>D</b> | <b>L</b> | <b>C</b> | <b>R</b> | <b>S</b> | <b>A</b> | <b>C</b> | <b>F</b> | <b>N</b> | <b>S</b> | <b>E</b> | <b>Y</b> | <b>F</b> | <b>K</b> | <b>E</b> | <b>C</b> | <b>E</b> | <b>A</b> | <b>N</b> | <b>L</b> | <b>Q</b> | <b>I</b> | <b>K</b> | <b>E</b> | <b>E</b> | <b>D</b> | <b>T</b> | <b>E</b> | <b>E</b> | <b>E</b> | <b>T</b> | <b>S</b> | -        | -        | -        | -        |     |
| Latroductin-Sno1f      | <i>S. nobilis</i>          | This study | <b>C</b> | <b>S</b> | <b>Q</b> | <b>C</b> | <b>G</b> | <b>Y</b> | <b>F</b> | <b>H</b> | <b>S</b> | <b>A</b> | <b>H</b> | <b>S</b> | <b>V</b> | <b>N</b> | <b>D</b> | <b>L</b> | <b>C</b> | <b>R</b> | <b>S</b> | <b>A</b> | <b>C</b> | <b>F</b> | <b>N</b> | <b>S</b> | <b>E</b> | <b>Y</b> | <b>F</b> | <b>K</b> | <b>E</b> | <b>C</b> | <b>E</b> | <b>A</b> | <b>N</b> | <b>L</b> | <b>Q</b> | <b>I</b> | <b>K</b> | <b>E</b> | <b>E</b> | <b>D</b> | <b>T</b> | <b>E</b> | <b>E</b> | <b>E</b> | <b>T</b> | <b>S</b> | -        | -        | -        | -        |     |

References

[1] Mc Cowan C. and Garb J.E.,

**Supplementary dataset 2 – Table2a- Alpha-Latrocrustotoxins- Sequences from position 01 to 1167:** Sequence alignments of the closest two alpha-latrocrustotoxins already published and the one found in the venom of *Steatoda nobilis*. Yellow windows indicate positions where the identity and/or the physico-chemical properties of the aminoacids are fully maintained, bold positions are the ones where 66% of the aminoacids are conserved. Cysteines are highlighted in red.

| IDENTIFICATION                      | SPECIES                | REF        | 1 | 2 | 3 | 4 | 5 | 6 | 7 | 8 | 9 | 10 | 11 | 12 | 13 | 14 | 15 | 16 | 17 | 18 | 19 | 20 | 21 | 22 | 23 | 24 | 25 | 26 | 27 | 28 | 29 | 30 | 31 | 32 | 33 | 34 | 35 | 36 | 37 | 38 | 39 | 40 | 41 | 42 | 43 | 44 | 45 | 46 | 47 | 48 | 49 | 50 |
|-------------------------------------|------------------------|------------|---|---|---|---|---|---|---|---|---|----|----|----|----|----|----|----|----|----|----|----|----|----|----|----|----|----|----|----|----|----|----|----|----|----|----|----|----|----|----|----|----|----|----|----|----|----|----|----|----|----|
| Alpha-Latrocrustotoxin-LtIta Q8XC20 | <i>L. iedecingatus</i> | [1]        | E | M | S | K | A | D | Q | C | T | F  | L  | S  | Y  | Q  | S  | V  | A  | Y  | G  | T  | L  | G  | D  | V  | A  | G  | D  | V  | S  | S  | I  | E  | G  | A  | D  | L  | V  | A  | T  | P  | I  | A  | A  | G  | G  | H  | L  | A  | K  | G  |
| Alpha-Latrocrustotoxin-LtIta Q02989 | <i>L. iedecingatus</i> | [1]        | E | M | S | R | A | D | Q | C | K | L  | A  | A  | Y  | T  | S  | V  | G  | Y  | E  | T  | V  | G  | N  | V  | A  | A  | D  | I  | A  | S  | I  | E  | G  | A  | N  | L  | V  | A  | A  | P  | V  | A  | A  | G  | G  | H  | L  | G  | K  | G  |
| Alpha-Latrocrustotoxin-Sno1a        | <i>S. nobilis</i>      | This study | E | M | T | R | A | E | G | C | T | I  | L  | Q  | Y  | T  | S  | I  | G  | Y  | D  | T  | V  | G  | N  | V  | A  | A  | D  | I  | S  | S  | I  | D  | G  | V  | N  | L  | V  | G  | A  | P  | I  | A  | A  | G  | S  | H  | L  | G  | K  | G  |

| IDENTIFICATION                      | SPECIES                | REF        | 51 | 52 | 53 | 54 | 55 | 56 | 57 | 58 | 59 | 60 | 61 | 62 | 63 | 64 | 65 | 66 | 67 | 68 | 69 | 70 | 71 | 72 | 73 | 74 | 75 | 76 | 77 | 78 | 79 | 80 | 81 | 82 | 83 | 84 | 85 | 86 | 87 | 88 | 89 | 90 | 91 | 92 | 93 | 94 | 95 | 96 | 97 | 98 | 99 | 100 |   |
|-------------------------------------|------------------------|------------|----|----|----|----|----|----|----|----|----|----|----|----|----|----|----|----|----|----|----|----|----|----|----|----|----|----|----|----|----|----|----|----|----|----|----|----|----|----|----|----|----|----|----|----|----|----|----|----|----|-----|---|
| Alpha-Latrocrustotoxin-LtIta Q8XC20 | <i>L. iedecingatus</i> | [1]        | A  | T  | D  | A  | A  | M  | I  | A  | M  | D  | C  | S  | S  | I  | P  | F  | D  | E  | I  | K  | Q  | Q  | L  | N  | Q  | R  | F  | N  | E  | V  | D  | K  | K  | L  | Q  | K  | G  | A  | E  | A  | L  | E  | N  | V  | T  | E  | L  | A  | E  | K   |   |
| Alpha-Latrocrustotoxin-LtIta Q02989 | <i>L. iedecingatus</i> | [1]        | L  | T  | D  | A  | A  | M  | I  | A  | M  | D  | C  | S  | S  | I  | P  | F  | E  | E  | I  | K  | Q  | E  | I  | L  | N  | K  | E  | F  | K  | E  | M  | G  | R  | K  | L  | D  | K  | N  | T  | E  | A  | L  | E  | H  | V  | S  | K  | L  | V  | S   | K |
| Alpha-Latrocrustotoxin-Sno1a        | <i>S. nobilis</i>      | This study | M  | T  | D  | A  | A  | M  | I  | A  | M  | D  | C  | A  | S  | S  | I  | P  | F  | E  | E  | I  | K  | Q  | I  | L  | N  | K  | R  | F  | N  | E  | L  | D  | K  | K  | L  | D  | K  | G  | A  | E  | A  | L  | E  | S  | V  | S  | K  | L  | V  | D   | K |

| IDENTIFICATION                      | SPECIES                | REF        | 101 | 102 | 103 | 104 | 105 | 106 | 107 | 108 | 109 | 110 | 111 | 112 | 113 | 114 | 115 | 116 | 117 | 118 | 119 | 120 | 121 | 122 | 123 | 124 | 125 | 126 | 127 | 128 | 129 | 130 | 131 | 132 | 133 | 134 | 135 | 136 | 137 | 138 | 139 | 140 | 141 | 142 | 143 | 144 | 145 | 146 | 147 | 148 | 149 | 150 |   |
|-------------------------------------|------------------------|------------|-----|-----|-----|-----|-----|-----|-----|-----|-----|-----|-----|-----|-----|-----|-----|-----|-----|-----|-----|-----|-----|-----|-----|-----|-----|-----|-----|-----|-----|-----|-----|-----|-----|-----|-----|-----|-----|-----|-----|-----|-----|-----|-----|-----|-----|-----|-----|-----|-----|-----|---|
| Alpha-Latrocrustotoxin-LtIta Q8XC20 | <i>L. iedecingatus</i> | [1]        | T   | Y   | S   | S   | V   | E   | K   | M   | R   | V   | E   | M   | R   | E   | G   | F   | N   | H   | V   | I   | A   | T   | I   | E   | N   | A   | N   | T   | K   | Q   | I   | I   | T   | G   | I   | N   | Q   | I   | I   | Q   | Y   | F   | N   | D   | E   | R   | E   | N   | I   | N   |   |
| Alpha-Latrocrustotoxin-LtIta Q02989 | <i>L. iedecingatus</i> | [1]        | T   | L   | S   | T   | V   | E   | K   | I   | R   | V   | E   | M   | R   | E   | G   | F   | K   | L   | V   | I   | E   | T   | I   | E   | N   | A   | N   | T   | K   | Q   | I   | I   | V   | F   | D   | I   | N   | K   | I   | V   | Q   | Y   | F   | N   | D   | E   | R   | E   | N   | I   | N |
| Alpha-Latrocrustotoxin-Sno1a        | <i>S. nobilis</i>      | This study | T   | Y   | R   | T   | V   | E   | K   | V   | R   | F   | E   | M   | R   | E   | G   | F   | K   | R   | V   | T   | E   | T   | I   | E   | N   | A   | A   | T   | K   | Q   | I   | I   | S   | Q   | I   | N   | E   | I   | V   | Q   | Y   | F   | S   | D   | E   | K   | E   | N   | I   | N   |   |

| IDENTIFICATION                      | SPECIES                | REF        | 151 | 152 | 153 | 154 | 155 | 156 | 157 | 158 | 159 | 160 | 161 | 162 | 163 | 164 | 165 | 166 | 167 | 168 | 169 | 170 | 171 | 172 | 173 | 174 | 175 | 176 | 177 | 178 | 179 | 180 | 181 | 182 | 183 | 184 | 185 | 186 | 187 | 188 | 189 | 190 | 191 | 192 | 193 | 194 | 195 | 196 | 197 | 198 | 199 | 200 |
|-------------------------------------|------------------------|------------|-----|-----|-----|-----|-----|-----|-----|-----|-----|-----|-----|-----|-----|-----|-----|-----|-----|-----|-----|-----|-----|-----|-----|-----|-----|-----|-----|-----|-----|-----|-----|-----|-----|-----|-----|-----|-----|-----|-----|-----|-----|-----|-----|-----|-----|-----|-----|-----|-----|-----|
| Alpha-Latrocrustotoxin-LtIta Q8XC20 | <i>L. iedecingatus</i> | [1]        | N   | R   | Q   | K   | E   | D   | Y   | V   | A   | K   | L   | Q   | E   | P   | A   | S   | G   | N   | F   | L   | L   | Y   | L   | R   | K   | S   | R   | T   | S   | E   | D   | G   | S   | L   | H   | S   | L   | L   | F   | K   | I   | I   | N   | Q   | E   | L   | A   | I   | P   | N   |
| Alpha-Latrocrustotoxin-LtIta Q02989 | <i>L. iedecingatus</i> | [1]        | S   | R   | Q   | K   | E   | E   | F   | V   | A   | K   | L   | Q   | E   | P   | A   | P   | G   | N   | F   | L   | L   | Y   | L   | R   | K   | S   | R   | T   | S   | E   | S   | G   | T   | L   | Y   | S   | L   | L   | F   | R   | I   | I   | D   | Q   | E   | L   | A   | I   | P   | N   |
| Alpha-Latrocrustotoxin-Sno1a        | <i>S. nobilis</i>      | This study | N   | R   | Q   | K   | E   | D   | Y   | V   | A   | K   | L   | R   | E   | P   | D   | S   | G   | N   | F   | L   | L   | Y   | L   | R   | K   | S   | R   | T   | L   | E   | E   | G   | S   | L   | H   | S   | L   | L   | F   | K   | I   | I   | N   | Q   | E   | S   | A   | I   | P   | N   |

| IDENTIFICATION                      | SPECIES                | REF        | 201 | 202 | 203 | 204 | 205 | 206 | 207 | 208 | 209 | 210 | 211 | 212 | 213 | 214 | 215 | 216 | 217 | 218 | 219 | 220 | 221 | 222 | 223 | 224 | 225 | 226 | 227 | 228 | 229 | 230 | 231 | 232 | 233 | 234 | 235 | 236 | 237 | 238 | 239 | 240 | 241 | 242 | 243 | 244 | 245 | 246 | 247 | 248 | 249 | 250 |   |
|-------------------------------------|------------------------|------------|-----|-----|-----|-----|-----|-----|-----|-----|-----|-----|-----|-----|-----|-----|-----|-----|-----|-----|-----|-----|-----|-----|-----|-----|-----|-----|-----|-----|-----|-----|-----|-----|-----|-----|-----|-----|-----|-----|-----|-----|-----|-----|-----|-----|-----|-----|-----|-----|-----|-----|---|
| Alpha-Latrocrustotoxin-LtIta Q8XC20 | <i>L. iedecingatus</i> | [1]        | N   | A   | A   | D   | N   | A   | A   | I   | R   | A   | L   | F   | A   | L   | F   | Y   | G   | T   | Q   | T   | F   | I   | S   | I   | M   | F   | Y   | L   | V   | K   | Q   | Y   | S   | Y   | L   | A   | C   | D   | Y   | H   | Y   | Q   | K   | G   | N   | L   | E   | E   | F   | N   | T |
| Alpha-Latrocrustotoxin-LtIta Q02989 | <i>L. iedecingatus</i> | [1]        | N   | A   | G   | D   | N   | A   | I   | Q   | A   | L   | Y   | A   | L   | F   | Y   | G   | T   | E   | T   | F   | I   | S   | I   | M   | F   | Y   | L   | V   | K   | Q   | Y   | S   | Y   | L   | A   | C   | D   | Y   | H   | Y   | Q   | K   | G   | N   | L   | E   | E   | F   | N   | T   |   |
| Alpha-Latrocrustotoxin-Sno1a        | <i>S. nobilis</i>      | This study | K   | A   | G   | D   | N   | A   | V   | R   | A   | L   | Y   | A   | L   | F   | Y   | G   | T   | Q   | T   | Y   | I   | S   | I   | M   | L   | Y   | L   | V   | K   | Q   | Y   | S   | Y   | L   | A   | D   | Y   | F   | Y   | Q   | E   | G   | N   | L   | E   | E   | F   | N   | E   |     |   |

| IDENTIFICATION                      | SPECIES                | REF        | 251 | 252 | 253 | 254 | 255 | 256 | 257 | 258 | 259 | 260 | 261 | 262 | 263 | 264 | 265 | 266 | 267 | 268 | 269 | 270 | 271 | 272 | 273 | 274 | 275 | 276 | 277 | 278 | 279 | 280 | 281 | 282 | 283 | 284 | 285 | 286 | 287 | 288 | 289 | 290 | 291 | 292 | 293 | 294 | 295 | 296 | 297 | 298 | 299 | 300 |
|-------------------------------------|------------------------|------------|-----|-----|-----|-----|-----|-----|-----|-----|-----|-----|-----|-----|-----|-----|-----|-----|-----|-----|-----|-----|-----|-----|-----|-----|-----|-----|-----|-----|-----|-----|-----|-----|-----|-----|-----|-----|-----|-----|-----|-----|-----|-----|-----|-----|-----|-----|-----|-----|-----|-----|
| Alpha-Latrocrustotoxin-LtIta Q8XC20 | <i>L. iedecingatus</i> | [1]        | N   | F   | D   | H   | M   | K   | T   | V   | F   | Q   | D   | F   | K   | F   | T   | L   | I   | G   | I   | N   | T   | S   | N   | S   | K   | P   | L   | V   | N   | T   | V   | L   | S   | I   | I   | E   | D   | V   | K   | N   | K   | R   | F   | I   | R   | N   | L   | S   | N   |     |
| Alpha-Latrocrustotoxin-LtIta Q02989 | <i>L. iedecingatus</i> | [1]        | N   | F   | D   | H   | M   | K   | I   | V   | F   | Q   | D   | F   | K   | F   | S   | L   | I   | G   | I   | N   | -   | Q   | N   | T   | K   | P   | L   | V   | D   | E   | V   | L   | N   | V   | L   | N   | N   | V   | K   | N   | K   | S   | F   | I   | R   | N   | V   | Q   | N   | K   |
| Alpha-Latrocrustotoxin-Sno1a        | <i>S. nobilis</i>      | This study | N   | F   | T   | H   | M   | K   | T   | V   | F   | K   | D   | F   | K   | F   | S   | L   | I   | G   | I   | R   | G   | Q   | S   | G   | T   | P   | L   | V   | D   | S   | V   | I   | H   | V   | L   | E   | T   | V   | K   | G   | K   | S   | F   | I   | R   | N   | L   | K   | N   | N   |

| IDENTIFICATION                      | SPECIES                | REF        | 301 | 302 | 303 | 304 | 305 | 306 | 307 | 308 | 309 | 310 | 311 | 312 | 313 | 314 | 315 | 316 | 317 | 318 | 319 | 320 | 321 | 322 | 323 | 324 | 325 | 326 | 327 | 328 | 329 | 330 | 331 | 332 | 333 | 334 | 335 | 336 | 337 | 338 | 339 | 340 | 341 | 342 | 343 | 344 | 345 | 346 | 347 | 348 | 349 | 350 |   |
|-------------------------------------|------------------------|------------|-----|-----|-----|-----|-----|-----|-----|-----|-----|-----|-----|-----|-----|-----|-----|-----|-----|-----|-----|-----|-----|-----|-----|-----|-----|-----|-----|-----|-----|-----|-----|-----|-----|-----|-----|-----|-----|-----|-----|-----|-----|-----|-----|-----|-----|-----|-----|-----|-----|-----|---|
| Alpha-Latrocrustotoxin-LtIta Q8XC20 | <i>L. iedecingatus</i> | [1]        | L   | Y   | Q   | K   | I   | I   | K   | S   | T   | K   | S   | L   | L   | D   | L   | R   | E   | K   | I   | T   | K   | M   | D   | L   | P   | I   | I   | E   | D   | T   | P   | K   | S   | S   | -   | V   | L   | I   | N   | F   | R   | E   | K   | S   | S   | S   | V   | P   | R   | I   |   |
| Alpha-Latrocrustotoxin-LtIta Q02989 | <i>L. iedecingatus</i> | [1]        | L   | F   | Y   | D   | L   | M   | K   | Q   | T   | E   | S   | L   | L   | E   | L   | R   | K   | E   | I   | A   | N   | M   | E   | L   | P   | I   | I   | D   | E   | T   | P   | R   | L   | S   | -   | I   | S   | I   | S   | F   | K   | E   | R   | S   | D   | D   | K   | P   | V   |     |   |
| Alpha-Latrocrustotoxin-Sno1a        | <i>S. nobilis</i>      | This study | L   | Y   | Q   | Q   | D   | I   | L   | K   | Q   | T   | D   | S   | L   | L   | K   | L   | K   | T   | E   | I   | A   | D   | M   | E   | L   | P   | I   | I   | D   | E   | T   | P   | K   | S   | S   | S   | V   | I   | I   | S   | F   | K   | E   | K   | S   | P   | S   | V   | V   | Q   | I |

| IDENTIFICATION                      | SPECIES                | REF        | 351 | 352 | 353 | 354 | 355 | 356 | 357 | 358 | 359 | 360 | 361 | 362 | 363 | 364 | 365 | 366 | 367 | 368 | 369 | 370 | 371 | 372 | 373 | 374 | 375 | 376 | 377 | 378 | 379 | 380 | 381 | 382 | 383 | 384 | 385 | 386 | 387 | 388 | 389 | 390 | 391 | 392 | 393 | 394 | 395 | 396 | 397 | 398 | 399 | 400 |
|-------------------------------------|------------------------|------------|-----|-----|-----|-----|-----|-----|-----|-----|-----|-----|-----|-----|-----|-----|-----|-----|-----|-----|-----|-----|-----|-----|-----|-----|-----|-----|-----|-----|-----|-----|-----|-----|-----|-----|-----|-----|-----|-----|-----|-----|-----|-----|-----|-----|-----|-----|-----|-----|-----|-----|
| Alpha-Latrocrustotoxin-LtIta Q8XC20 | <i>L. iedecingatus</i> | [1]        | E   | T   | P   | I   | L   | K   | W   | T   | P   | G   | T   | V   | V   | K   | Y   | A   | I   | Q   | Y   | E   | Q   | D   | G   | K   | Y   | S   | K   | I   | S   | K   | W   | S   | N   | P   | I   | T   | V   | Q   | R   | L   | A   | N   | P   | Y   | I   | T   | I   | D   | K   | D   |
| Alpha-Latrocrustotoxin-LtIta Q02989 | <i>L. iedecingatus</i> | [1]        | D   | T   | P   | L   | L   | K   | W   | D   | K   | G   | K   | E   | V   | K   | Y   | A   | I   | Q   | F   | E   | Q   | D   | G   | K   | F   | S   | K   | I   | S   | W   | S   | K   | P   | V   | T   | V   | Q   | H   | L   | A   | C   | P   | F   | I   | S   | V   | D   | K   | D   |     |
| Alpha-Latrocrustotoxin-Sno1a        | <i>S. nobilis</i>      | This study | E   | T   | P   | I   | L   | K   | W   | N   | P   | G   | T   | D   | V   | K   | Y   | A   | V   | Q   | Y   | E   | Q   | D   | G   | K   | Y   | S   | K   | I   | S   | S   | W   | S   | N   | P   | I   | T   | I   | Q   | G   | L   | A   | C   | P   | F   | I   | T   | I   | D   | K   | S   |

| IDENTIFICATION                      | SPECIES                | REF        | 401 | 402 | 403 | 404 | 405 | 406 | 407 | 408 | 409 | 410 | 411 | 412 | 413 | 414 | 415 | 416 | 417 | 418 | 419 | 420 | 421 | 422 | 423 | 424 | 425 | 426 | 427 | 428 | 429 | 430 | 431 | 432 | 433 | 434 | 435 | 436 | 437 | 438 | 439 | 440 | 441 | 442 | 443 | 444 | 445 | 446 | 447 | 448 | 449 | 450 |
|-------------------------------------|------------------------|------------|-----|-----|-----|-----|-----|-----|-----|-----|-----|-----|-----|-----|-----|-----|-----|-----|-----|-----|-----|-----|-----|-----|-----|-----|-----|-----|-----|-----|-----|-----|-----|-----|-----|-----|-----|-----|-----|-----|-----|-----|-----|-----|-----|-----|-----|-----|-----|-----|-----|-----|
| Alpha-Latrocrustotoxin-LtIta Q8XC20 | <i>L. iedecingatus</i> | [1]        | R   | R   | N   | R   | L   | V   | F   | R   | Q   | F   | G   | N   | E   | K   | P   | E   | L   | I   | S   | I   | L   | D   | S   | K   | N   | E   | F   | R   | D   | I   | H   | R   | D   | L   | Y   | N   | A   | A   | Q   | M   | P   | Y   | K   | E   | T   | A   | L   | G   | I   |     |
| Alpha-Latrocrustotoxin-LtIta Q02989 | <i>L. iedecingatus</i> | [1]        | R   | R   | N   | R   | L   | I   | F   | R   | Q   | F   | G   | D   | Q   | I   | P   | E   | L   | V   | G   | T   | L   | R   | G   | S   | Q   | V   | E   | F   | R   | D   | I   | H   | R   | D   | L   | Y   | N   | A   | A   | Q   | V   | P   | Y   | A   | R   | E   | A   | L   | S   | I   |
| Alpha-Latrocrustotoxin-Sno1a        | <i>S. nobilis</i>      | This study | P   | R   | N   | R   | L   | V   | F   | R   | Q   | F   | G   | S   | Q   | T   | P   | E   | L   | V   | A   | I   | L   | N   | G   | S   | Q   | N   | E   | F   | R   | D   | I   | H   | R   | D   | L   | F   | N   | A   | A   | Q   | M   | L   | M   | R   | E   | N   | A   | A   | T   | T   |

| IDENTIFICATION | SPECIES | REF | 451 | 452 | 453 | 454 | 455 | 456 | 457 | 458 | 459 | 460 | 461 | 462 | 463 | 464 | 465 | 466 | 467 | 468 | 469 | 470 | 471 | 472 | 473 | 474 | 475 | 476 | 477 | 478 | 479 | 480 | 481 | 482 | 483 | 484 | 485 | 486 | 487 | 488 | 489 | 490 | 491 | 492 | 493 | 494 | 495 | 496 | 497 | 498 |
|----------------|---------|-----|-----|-----|-----|-----|-----|-----|-----|-----|-----|-----|-----|-----|-----|-----|-----|-----|-----|-----|-----|-----|-----|-----|-----|-----|-----|-----|-----|-----|-----|-----|-----|-----|-----|-----|-----|-----|-----|-----|-----|-----|-----|-----|-----|-----|-----|-----|-----|-----|
|----------------|---------|-----|-----|-----|-----|-----|-----|-----|-----|-----|-----|-----|-----|-----|-----|-----|-----|-----|-----|-----|-----|-----|-----|-----|-----|-----|-----|-----|-----|-----|-----|-----|-----|-----|-----|-----|-----|-----|-----|-----|-----|-----|-----|-----|-----|-----|-----|-----|-----|-----|

**Supplementary dataset 2 – Table2b- Alpha-Latrocrustotoxins- Sequences from position 701 to 700:** Sequence alignments of the closest two alpha-latrocrustotoxins already published and the one found in the venom of *Steatoda nobilis*. Yellow windows indicate positions where the identity and/or the physico-chemical properties of the aminoacids are fully maintained, bold positions are the ones where 66% of the aminoacids are conserved. Cysteines are highlighted in red.

| IDENTIFICATION                 | SPECIES                  | REF        | 751 | 752 | 753 | 754 | 755 | 756 | 757 | 758 | 759 | 760 | 761 | 762 | 763 | 764 | 765 | 766 | 767 | 768 | 769 | 770 | 771 | 772 | 773 | 774 | 775 | 776 | 777 | 778 | 779 | 780 | 781 | 782 | 783 | 784 | 785 | 786 | 787 | 788 | 789 | 790 | 791 | 792 | 793 | 794 | 795 | 796 | 797 | 798 | 799 | 800 |
|--------------------------------|--------------------------|------------|-----|-----|-----|-----|-----|-----|-----|-----|-----|-----|-----|-----|-----|-----|-----|-----|-----|-----|-----|-----|-----|-----|-----|-----|-----|-----|-----|-----|-----|-----|-----|-----|-----|-----|-----|-----|-----|-----|-----|-----|-----|-----|-----|-----|-----|-----|-----|-----|-----|-----|
| Alpha-Lacustotoxin-Lt1a Q8XZC0 | <i>L. medecingutatus</i> | [1]        | P   | N   | T   | E   | T   | P   | Q   | F   | L   | I   | A   | K   | G   | A   | N   | I   | N   | A   | K   | T   | N   | D   | G   | S   | T   | P   | L   | H   | F   | A   | A   | A   | L   | G   | K   | T   | N   | I   | F   | Q   | L   | L   | M   | D   | K   | G   | A   | N   | I   | K   |
| Alpha-Lacustotoxin-Lt1a Q02989 | <i>L. medecingutatus</i> | [1]        | K   | N   | E   | E   | I   | P   | F   | F   | L   | V   | E   | K   | G   | A   | N   | V   | N   | D   | K   | T   | N   | S   | G   | V   | T   | P   | L   | H   | F   | A   | A   | G   | L   | G   | K   | A   | N   | I   | F   | Q   | L   | L   | L   | S   | R   | G   | A   | D   | I   | K   |
| Alpha-Latrocrustotoxin-Sno1a   | <i>S. nobilis</i>        | This study | K   | N   | E   | A   | T   | P   | P   | F   | L   | I   | E   | K   | G   | A   | N   | I   | N   | A   | K   | T   | N   | F   | G   | A   | T   | P   | L   | H   | L   | A   | A   | A   | L   | G   | K   | V   | S   | I   | F   | K   | T   | L   | L   | G   | K   | G   | A   | N   | I   | K   |

| IDENTIFICATION                 | SPECIES                  | REF        | 801 | 802 | 803 | 804 | 805 | 806 | 807 | 808 | 809 | 810 | 811 | 812 | 813 | 814 | 815 | 816 | 817 | 818 | 819 | 820 | 821 | 822 | 823 | 824 | 825 | 826 | 827 | 828 | 829 | 830 | 831 | 832 | 833 | 834 | 835 | 836 | 837 | 838 | 839 | 840 | 841 | 842 | 843 | 844 | 845 | 846 | 847 | 848 | 849 | 850 |
|--------------------------------|--------------------------|------------|-----|-----|-----|-----|-----|-----|-----|-----|-----|-----|-----|-----|-----|-----|-----|-----|-----|-----|-----|-----|-----|-----|-----|-----|-----|-----|-----|-----|-----|-----|-----|-----|-----|-----|-----|-----|-----|-----|-----|-----|-----|-----|-----|-----|-----|-----|-----|-----|-----|-----|
| Alpha-Lacustotoxin-Lt1a Q8XZC0 | <i>L. medecingutatus</i> | [1]        | A   | E   | N   | L   | I   | N   | Q   | M   | P   | I   | H   | E   | A   | V   | V   | N   | G   | H   | L   | A   | I   | V   | K   | M   | L   | I   | E   | Q   | D   | S   | S   | L   | M   | N   | A   | K   | N   | M   | R   | D   | E   | Y   | P   | F   | Y   | L   | A   | A   | E   | K   |
| Alpha-Lacustotoxin-Lt1a Q02989 | <i>L. medecingutatus</i> | [1]        | A   | E   | D   | I   | N   | S   | Q   | M   | P   | I   | H   | E   | A   | V   | S   | N   | G   | H   | L   | E   | I   | V   | R   | I   | L   | I   | E   | K   | D   | P   | S   | L   | M   | N   | V   | K   | N   | I   | R   | N   | E   | Y   | P   | F   | Y   | L   | A   | V   | E   | K   |
| Alpha-Latrocrustotoxin-Sno1a   | <i>S. nobilis</i>        | This study | A   | Q   | D   | I   | N   | L   | Q   | M   | P   | I   | H   | E   | A   | V   | S   | N   | G   | H   | L   | E   | I   | V   | Q   | I   | L   | I   | D   | K   | D   | S   | S   | L   | M   | N   | E   | K   | N   | I   | R   | Q   | E   | Y   | P   | F   | Y   | L   | A   | A   | E   | K   |

| IDENTIFICATION                 | SPECIES                  | REF        | 851 | 852 | 853 | 854 | 855 | 856 | 857 | 858 | 859 | 860 | 861 | 862 | 863 | 864 | 865 | 866 | 867 | 868 | 869 | 870 | 871 | 872 | 873 | 874 | 875 | 876 | 877 | 878 | 879 | 880 | 881 | 882 | 883 | 884 | 885 | 886 | 887 | 888 | 889 | 890 | 891 | 892 | 893 | 894 | 895 | 896 | 897 | 898 | 899 | 900 |   |
|--------------------------------|--------------------------|------------|-----|-----|-----|-----|-----|-----|-----|-----|-----|-----|-----|-----|-----|-----|-----|-----|-----|-----|-----|-----|-----|-----|-----|-----|-----|-----|-----|-----|-----|-----|-----|-----|-----|-----|-----|-----|-----|-----|-----|-----|-----|-----|-----|-----|-----|-----|-----|-----|-----|-----|---|
| Alpha-Lacustotoxin-Lt1a Q8XZC0 | <i>L. medecingutatus</i> | [1]        | R   | Y   | K   | D   | I   | N   | F   | D   | Y   | F   | V   | S   | K   | D   | A   | N   | V   | N   | E   | K   | N   | N   | D   | G   | N   | T   | L   | L   | H   | L   | F   | S   | T   | T   | G   | E   | V   | E   | V   | V   | Q   | F   | L   | I   | Q   | N   | G   | A   | D   | F   | R |
| Alpha-Lacustotoxin-Lt1a Q02989 | <i>L. medecingutatus</i> | [1]        | R   | Y   | K   | D   | I   | N   | F   | D   | Y   | F   | V   | S   | K   | D   | A   | N   | V   | N   | E   | K   | D   | E   | E   | G   | S   | T   | L   | L   | H   | L   | F   | S   | T   | T   | G   | E   | L   | E   | V   | V   | Q   | F   | L   | I   | Q   | N   | G   | A   | D   | F   | R |
| Alpha-Latrocrustotoxin-Sno1a   | <i>S. nobilis</i>        | This study | R   | Y   | K   | D   | I   | N   | F   | D   | Y   | F   | V   | S   | K   | D   | A   | N   | V   | N   | E   | K   | D   | E   | E   | G   | S   | T   | L   | L   | H   | L   | F   | S   | T   | T   | G   | E   | L   | E   | V   | V   | Q   | F   | L   | I   | Q   | N   | G   | A   | D   | F   | R |

| IDENTIFICATION                 | SPECIES                  | REF        | 901 | 902 | 903 | 904 | 905 | 906 | 907 | 908 | 909 | 910 | 911 | 912 | 913 | 914 | 915 | 916 | 917 | 918 | 919 | 920 | 921 | 922 | 923 | 924 | 925 | 926 | 927 | 928 | 929 | 930 | 931 | 932 | 933 | 934 | 935 | 936 | 937 | 938 | 939 | 940 | 941 | 942 | 943 | 944 | 945 | 946 | 947 | 948 | 949 | 950 |
|--------------------------------|--------------------------|------------|-----|-----|-----|-----|-----|-----|-----|-----|-----|-----|-----|-----|-----|-----|-----|-----|-----|-----|-----|-----|-----|-----|-----|-----|-----|-----|-----|-----|-----|-----|-----|-----|-----|-----|-----|-----|-----|-----|-----|-----|-----|-----|-----|-----|-----|-----|-----|-----|-----|-----|
| Alpha-Lacustotoxin-Lt1a Q8XZC0 | <i>L. medecingutatus</i> | [1]        | L   | R   | N   | K   | E   | R   | K   | S   | F   | F   | D   | L   | A   | V   | E   | F   | G   | H   | A   | G   | I   | V   | G   | Y   | A   | I   | E   | E   | N   | K   | V   | D   | L   | Q   | E   | P   | Y   | R   | G   | K   | T   | I   | L   | Y   | H   | A   | I   | C   | D   | S   |
| Alpha-Lacustotoxin-Lt1a Q02989 | <i>L. medecingutatus</i> | [1]        | L   | K   | N   | N   | E   | R   | K   | T   | F   | F   | D   | L   | A   | I   | E   | N   | G   | R   | L   | N   | I   | V   | A   | F   | A   | V   | E   | K   | N   | K   | V   | N   | L   | Q   | A   | A   | H   | R   | G   | K   | T   | I   | L   | Y   | H   | A   | I   | C   | D   | S   |
| Alpha-Latrocrustotoxin-Sno1a   | <i>S. nobilis</i>        | This study | L   | R   | N   | K   | K   | G   | K   | N   | F   | F   | D   | F   | A   | V   | E   | N   | G   | H   | A   | N   | I   | V   | T   | F   | A   | V   | D   | E   | N   | K   | V   | D   | L   | H   | E   | K   | Y   | K   | G   | E   | N   | V   | L   | Y   | H   | A   | L   | C   | D   | A   |

| IDENTIFICATION                 | SPECIES                  | REF        | 951 | 952 | 953 | 954 | 955 | 956 | 957 | 958 | 959 | 960 | 961 | 962 | 963 | 964 | 965 | 966 | 967 | 968 | 969 | 970 | 971 | 972 | 973 | 974 | 975 | 976 | 977 | 978 | 979 | 980 | 981 | 982 | 983 | 984 | 985 | 986 | 987 | 988 | 989 | 990 | 991 | 992 | 993 | 994 | 995 | 996 | 997 | 998 | 999 | 1000 |
|--------------------------------|--------------------------|------------|-----|-----|-----|-----|-----|-----|-----|-----|-----|-----|-----|-----|-----|-----|-----|-----|-----|-----|-----|-----|-----|-----|-----|-----|-----|-----|-----|-----|-----|-----|-----|-----|-----|-----|-----|-----|-----|-----|-----|-----|-----|-----|-----|-----|-----|-----|-----|-----|-----|------|
| Alpha-Lacustotoxin-Lt1a Q8XZC0 | <i>L. medecingutatus</i> | [1]        | V   | K   | Y   | D   | R   | I   | E   | V   | V   | R   | Y   | F   | V   | E   | T   | L   | N   | E   | D   | Q   | C   | S   | P   | L   | Q   | E   | A   | A   | A   | Y   | A   | H   | L   | D   | L   | H   | K   | I   | D   | V   | N   | T   | R   | N   | K   | E   | Q   | -   | F   | T    |
| Alpha-Lacustotoxin-Lt1a Q02989 | <i>L. medecingutatus</i> | [1]        | A   | K   | Y   | D   | K   | I   | E   | I   | V   | K   | Y   | F   | I   | E   | K   | L   | N   | E   | S   | E   | C   | N   | P   | L   | H   | E   | A   | A   | A   | Y   | A   | H   | L   | D   | L   | H   | K   | I   | D   | V   | N   | T   | R   | N   | K   | E   | Q   | -   | F   | T    |
| Alpha-Latrocrustotoxin-Sno1a   | <i>S. nobilis</i>        | This study | V   | K   | Y   | D   | S   | F   | E   | V   | V   | K   | Y   | F   | V   | E   | T   | M   | N   | E   | V   | V   | C   | S   | P   | L   | H   | E   | A   | A   | A   | Y   | A   | H   | L   | D   | L   | V   | K   | Y   | F   | V   | Q   | E   | R   | G   | I   | H   | P   | S   | A   | F    |

| IDENTIFICATION                 | SPECIES                  | REF        | 1001 | 1002 | 1003 | 1004 | 1005 | 1006 | 1007 | 1008 | 1009 | 1010 | 1011 | 1012 | 1013 | 1014 | 1015 | 1016 | 1017 | 1018 | 1019 | 1020 | 1021 | 1022 | 1023 | 1024 | 1025 | 1026 | 1027 | 1028 | 1029 | 1030 | 1031 | 1032 | 1033 | 1034 | 1035 | 1036 | 1037 | 1038 | 1039 | 1040 | 1041 | 1042 | 1043 | 1044 | 1045 | 1046 | 1047 | 1048 | 1049 | 1050 |   |
|--------------------------------|--------------------------|------------|------|------|------|------|------|------|------|------|------|------|------|------|------|------|------|------|------|------|------|------|------|------|------|------|------|------|------|------|------|------|------|------|------|------|------|------|------|------|------|------|------|------|------|------|------|------|------|------|------|------|---|
| Alpha-Lacustotoxin-Lt1a Q8XZC0 | <i>L. medecingutatus</i> | [1]        | P    | L    | H    | A    | A    | A    | S    | N    | D    | H    | I    | D    | V    | V    | K    | Y    | L    | I    | Q    | K    | G    | A    | D    | V    | N    | A    | K    | G    | D    | E    | N    | L    | K    | P    | I    | D    | L    | A    | G    | E    | K    | S    | K    | A    | Y    | E    | C    | D    | T    | Q    |   |
| Alpha-Lacustotoxin-Lt1a Q02989 | <i>L. medecingutatus</i> | [1]        | P    | L    | H    | A    | A    | A    | S    | N    | D    | H    | I    | D    | V    | V    | K    | Y    | L    | I    | Q    | K    | G    | A    | D    | V    | N    | A    | K    | G    | D    | E    | N    | L    | K    | P    | I    | D    | L    | A    | G    | E    | K    | S    | K    | A    | Y    | E    | C    | D    | T    | Q    |   |
| Alpha-Latrocrustotoxin-Sno1a   | <i>S. nobilis</i>        | This study | D    | E    | E    | N    | Q    | V    | S    | P    | L    | C    | L    | A    | V    | S    | G    | N    | V    | C    | I    | G    | V    | L    | V    | S    | C    | D    | T    | P    | E    | R    | L    | D    | V    | V    | K    | Y    | L    | A    | G    | K    | T    | T    | D    | L    | N    | R    | E    | C    | D    | T    | Q |

| IDENTIFICATION                 | SPECIES                  | REF        | 1051 | 1052 | 1053 | 1054 | 1055 | 1056 | 1057 | 1058 | 1059 | 1060 | 1061 | 1062 | 1063 | 1064 | 1065 | 1066 | 1067 | 1068 | 1069 | 1070 | 1071 | 1072 | 1073 | 1074 | 1075 | 1076 | 1077 | 1078 | 1079 | 1080 | 1081 | 1082 | 1083 | 1084 | 1085 | 1086 | 1087 | 1088 | 1089 | 1090 | 1091 | 1092 | 1093 | 1094 | 1095 | 1096 | 1097 | 1098 | 1099 | 1100 |
|--------------------------------|--------------------------|------------|------|------|------|------|------|------|------|------|------|------|------|------|------|------|------|------|------|------|------|------|------|------|------|------|------|------|------|------|------|------|------|------|------|------|------|------|------|------|------|------|------|------|------|------|------|------|------|------|------|------|
| Alpha-Lacustotoxin-Lt1a Q8XZC0 | <i>L. medecingutatus</i> | [1]        | Q    | S    | T    | P    | V    | S    | S    | A    | V    | Y    | G    | N    | K    | V    | S    | I    | L    | N    | Y    | L    | I    | R    | N    | G    | A    | D    | P    | N    | K    | K    | V    | R    | G    | D    | P    | P    | L    | F    | I    | A    | A    | M    | I    | G    | Q    | Y    | D    | I    | V    | K    |
| Alpha-Lacustotoxin-Lt1a Q02989 | <i>L. medecingutatus</i> | [1]        | E    | N    | T    | P    | I    | T    | V    | A    | I    | F    | A    | N    | K    | V    | S    | I    | L    | N    | Y    | L    | V    | G    | I    | G    | A    | D    | P    | N    | Q    | Q    | V    | D    | G    | D    | P    | P    | L    | Y    | I    | A    | A    | R    | Q    | G    | R    | F    | E    | I    | V    | R    |
| Alpha-Latrocrustotoxin-Sno1a   | <i>S. nobilis</i>        | This study | N    | G    | T    | P    | I    | L    | H    | A    | V    | Y    | G    | N    | K    | V    | N    | I    | L    | N    | Y    | L    | V    | P    | A    | G    | A    | D    | P    | N    | K    | K    | V    | N    | R    | D    | P    | P    | L    | Y    | T    | A    | A    | M    | I    | G    | H    | Y    | E    | I    | V    | K    |

| IDENTIFICATION                 | SPECIES                  | REF        | 1101 | 1102 | 1103 | 1104 | 1105 | 1106 | 1107 | 1108 | 1109 | 1110 | 1111 | 1112 | 1113 | 1114 | 1115 | 1116 | 1117 | 1118 | 1119 | 1120 | 1121 | 1122 | 1123 | 1124 | 1125 | 1126 | 1127 | 1128 | 1129 | 1130 | 1131 | 1132 | 1133 | 1134 | 1135 | 1136 | 1137 | 1138 | 1139 | 1140 | 1141 | 1142 | 1143 | 1144 | 1145 | 1146 | 1147 | 1148 | 1149 | 1150 |   |
|--------------------------------|--------------------------|------------|------|------|------|------|------|------|------|------|------|------|------|------|------|------|------|------|------|------|------|------|------|------|------|------|------|------|------|------|------|------|------|------|------|------|------|------|------|------|------|------|------|------|------|------|------|------|------|------|------|------|---|
| Alpha-Lacustotoxin-Lt1a Q8XZC0 | <i>L. medecingutatus</i> | [1]        | S    | L    | V    | E    | Q    | H    | K    | I    | D    | V    | N    | T    | R    | N    | K    | E    | Q    | -    | F    | T    | P    | L    | H    | A    | A    | A    | S    | N    | D    | H    | I    | D    | V    | V    | K    | Y    | L    | I    | Q    | K    | G    | A    | D    | V    | N    | A    | K    | G    | D    | E    |   |
| Alpha-Lacustotoxin-Lt1a Q02989 | <i>L. medecingutatus</i> | [1]        | C    | L    | I    | E    | V    | H    | K    | V    | D    | V    | N    | T    | R    | N    | E    | E    | E    | N    | -    | F    | T    | P    | L    | H    | A    | A    | A    | R    | N    | D    | F    | M    | D    | V    | V    | K    | Y    | L    | I    | S    | K    | G    | A    | D    | V    | N    | A    | V    | G    | I    | D |
| Alpha-Latrocrustotoxin-Sno1a   | <i>S. nobilis</i>        | This study | S    | L    | I    | E    | K    | H    | G    | V    | D    | V    | N    | T    | R    | N    | E    | E    | E    | N    | -    | F    | T    | P    | L    | H    | A    | A    | A    | R    | N    | D    | H    | I    | D    | V    | V    | K    | Y    | L    | I    | S    | K    | G    | A    | D    | V    | N    | A    | V    | G    | I    | D |

| IDENTIFICATION                 | SPECIES                  | REF        | 1151 | 1152 | 1153 | 1154 | 1155 | 1156 | 1157 | 1158 | 1159 | 1160 | 1161 | 1162 | 1163 | 1164 | 1165 | 1166 | 1167 |
|--------------------------------|--------------------------|------------|------|------|------|------|------|------|------|------|------|------|------|------|------|------|------|------|------|
| Alpha-Lacustotoxin-Lt1a Q8XZC0 | <i>L. medecingutatus</i> | [1]        | N    | L    | K    | P    | I    | D    | L    | A    | G    | E    | K    | S    | K    | A    | Y    | L    | R    |
| Alpha-Lacustotoxin-Lt1a Q02989 | <i>L. medecingutatus</i> | [1]        | D    | L    | R    | P    | I    | D    | I    | A    | G    | E    | K    | A    | K    | A    | Y    | L    | -    |
| Alpha-Latrocrustotoxin-Sno1a   | <i>S. nobilis</i>        | This study | N    | L    | K    | P    | I    | D    | L    | A    | G    | E    | K    | S    | Q    | A    | Y    | L    | -    |

Reference

[1] Grishin E.V. 1998, Toxicon, 36, 1693-1701.

**Supplementary dataset 2 – Table 3a- Alpha-Latrotoxins- Sequences from position 1 to 500:** Sequence alignments of the closest two alpha-latrotoxins already published and the five most abundant found in the venom of *Steatoda nobilis*. Yellow windows indicate positions where the identity and/or the physico-chemical properties of the aminoacids is maintained at least for 4 possibilities over 7, bold positions are the ones where the positions are maintained 2 or 3 times (over 7). Cysteines are highlighted in red.

| IDENTIFICATION          | SPECIES       | REF        | 1 | 2 | 3 | 4 | 5 | 6 | 7 | 8 | 9 | 10 | 11 | 12 | 13 | 14 | 15 | 16 | 17 | 18 | 19 | 20 | 21 | 22 | 23 | 24 | 25 | 26 | 27 | 28 | 29 | 30 | 31 | 32 | 33 | 34 | 35 | 36 | 37 | 38 | 39 | 40 | 41 | 42 | 43 | 44 | 45 | 46 | 47 | 48 | 49 | 50 |   |   |   |   |   |   |   |   |   |   |   |   |   |   |   |   |   |   |   |   |   |   |   |   |   |   |   |   |   |   |   |   |   |   |   |   |   |   |   |   |   |   |   |   |   |   |   |   |   |   |   |   |   |   |   |   |   |   |   |   |   |   |   |   |   |   |   |   |   |   |   |   |   |   |   |   |   |   |   |   |   |   |   |   |   |   |   |   |   |   |   |   |   |   |   |   |   |   |   |   |   |   |   |   |   |   |   |   |   |   |   |   |   |   |   |   |   |   |   |   |   |   |   |   |   |   |   |   |   |   |   |   |   |   |   |   |   |   |   |   |   |   |   |   |   |   |   |   |   |   |   |   |   |   |   |   |   |   |   |   |   |   |   |   |   |   |   |   |   |   |   |   |   |   |   |   |   |   |   |   |   |   |   |   |   |   |   |   |   |   |   |   |   |   |   |   |   |   |   |   |   |   |   |   |   |   |   |   |   |   |   |   |   |   |   |   |   |   |   |   |   |   |   |   |   |   |   |   |   |   |   |   |   |   |   |   |   |   |   |   |   |   |   |   |   |   |   |   |   |   |   |   |   |   |   |   |   |   |   |   |   |   |   |   |   |   |   |   |   |   |   |   |   |   |   |   |   |   |   |   |   |   |   |   |   |   |   |   |   |   |   |   |   |   |   |   |   |   |   |   |   |   |   |   |   |   |   |   |   |   |   |   |   |   |   |   |   |   |   |   |   |   |   |   |   |   |   |   |   |   |   |   |   |   |   |   |   |   |   |   |   |   |   |   |   |   |   |   |   |   |   |   |   |   |   |   |   |   |   |   |   |   |   |   |   |   |   |   |   |   |   |   |   |   |   |   |   |   |   |   |   |   |   |   |   |   |   |   |   |   |   |   |   |   |   |   |   |   |   |   |   |   |   |   |   |   |   |   |   |   |   |   |   |   |   |   |   |   |   |   |   |   |   |   |   |   |   |   |   |   |   |   |   |   |   |   |   |   |   |   |   |   |   |   |   |   |   |   |   |   |   |   |   |   |   |   |   |   |   |   |   |   |   |   |   |   |   |   |   |   |   |   |   |   |   |   |   |   |   |   |   |   |   |   |   |   |   |   |   |   |   |   |   |   |   |   |   |   |   |   |   |   |   |   |   |   |   |   |   |   |   |   |   |   |   |   |   |   |   |   |   |   |   |   |   |   |   |   |   |   |   |   |   |   |   |   |   |   |   |   |   |   |   |   |   |   |   |   |   |   |   |   |   |   |   |   |   |   |   |   |   |   |   |   |   |   |   |   |   |   |   |   |   |   |   |   |   |   |   |   |   |   |   |   |   |   |   |   |   |   |   |   |   |   |   |   |   |   |   |   |   |   |   |   |   |   |   |   |   |   |   |   |   |   |   |   |   |   |   |   |   |   |   |   |   |   |   |   |   |   |   |   |   |   |   |   |   |   |   |   |   |   |   |   |   |   |   |   |   |   |   |   |   |   |   |   |   |   |   |   |   |   |   |   |   |   |   |   |   |   |   |   |   |   |   |   |   |   |   |   |   |   |   |   |   |   |   |   |   |   |   |   |   |   |   |   |   |   |   |   |   |   |   |   |   |   |   |   |   |   |   |   |   |   |   |   |   |   |   |   |   |   |   |   |   |   |   |   |   |   |   |   |   |   |   |   |   |   |   |   |   |   |   |   |   |   |   |   |   |   |   |   |   |   |   |   |   |   |   |   |   |   |   |   |   |   |   |   |   |   |   |   |   |   |   |   |   |   |   |   |   |   |   |   |   |   |   |   |   |   |   |   |   |   |   |   |   |   |   |   |   |   |   |   |   |   |   |   |   |   |   |   |   |   |   |   |   |   |   |   |   |   |   |   |   |   |   |   |   |   |   |   |   |   |   |   |   |   |   |   |   |   |   |   |   |   |   |   |   |   |   |   |   |   |   |   |   |   |   |   |   |   |   |   |   |   |   |   |   |   |   |   |   |   |   |   |   |   |   |   |   |   |   |   |   |   |   |   |   |   |   |   |   |   |   |   |   |   |   |   |   |   |   |   |   |   |   |   |   |   |   |   |   |   |   |   |   |   |   |   |   |   |   |   |   |   |   |   |   |   |   |   |   |   |   |   |   |   |   |   |   |   |   |   |   |   |   |   |   |   |   |   |   |   |   |   |   |   |   |   |   |   |   |   |   |   |   |   |   |   |   |   |   |   |   |   |   |   |   |   |   |   |   |   |   |   |   |   |   |   |   |   |   |   |   |   |   |   |   |   |   |   |   |   |   |   |   |   |   |   |   |   |   |   |   |   |   |   |   |   |   |   |   |   |   |   |   |   |   |   |   |   |   |   |   |   |   |   |   |   |   |   |   |   |   |   |   |   |   |   |   |   |   |   |   |   |   |   |   |   |   |   |   |   |   |   |   |   |   |   |   |   |   |   |   |   |   |   |   |   |   |   |   |   |   |   |   |   |   |   |   |   |   |   |   |   |   |   |   |   |   |   |   |   |   |   |   |   |   |   |   |   |   |   |   |   |   |   |   |   |   |   |   |   |   |   |   |   |   |   |   |   |   |   |   |   |   |   |   |   |   |   |   |   |   |   |   |   |   |   |   |   |   |   |   |   |   |   |   |     |
|-------------------------|---------------|------------|---|---|---|---|---|---|---|---|---|----|----|----|----|----|----|----|----|----|----|----|----|----|----|----|----|----|----|----|----|----|----|----|----|----|----|----|----|----|----|----|----|----|----|----|----|----|----|----|----|----|---|---|---|---|---|---|---|---|---|---|---|---|---|---|---|---|---|---|---|---|---|---|---|---|---|---|---|---|---|---|---|---|---|---|---|---|---|---|---|---|---|---|---|---|---|---|---|---|---|---|---|---|---|---|---|---|---|---|---|---|---|---|---|---|---|---|---|---|---|---|---|---|---|---|---|---|---|---|---|---|---|---|---|---|---|---|---|---|---|---|---|---|---|---|---|---|---|---|---|---|---|---|---|---|---|---|---|---|---|---|---|---|---|---|---|---|---|---|---|---|---|---|---|---|---|---|---|---|---|---|---|---|---|---|---|---|---|---|---|---|---|---|---|---|---|---|---|---|---|---|---|---|---|---|---|---|---|---|---|---|---|---|---|---|---|---|---|---|---|---|---|---|---|---|---|---|---|---|---|---|---|---|---|---|---|---|---|---|---|---|---|---|---|---|---|---|---|---|---|---|---|---|---|---|---|---|---|---|---|---|---|---|---|---|---|---|---|---|---|---|---|---|---|---|---|---|---|---|---|---|---|---|---|---|---|---|---|---|---|---|---|---|---|---|---|---|---|---|---|---|---|---|---|---|---|---|---|---|---|---|---|---|---|---|---|---|---|---|---|---|---|---|---|---|---|---|---|---|---|---|---|---|---|---|---|---|---|---|---|---|---|---|---|---|---|---|---|---|---|---|---|---|---|---|---|---|---|---|---|---|---|---|---|---|---|---|---|---|---|---|---|---|---|---|---|---|---|---|---|---|---|---|---|---|---|---|---|---|---|---|---|---|---|---|---|---|---|---|---|---|---|---|---|---|---|---|---|---|---|---|---|---|---|---|---|---|---|---|---|---|---|---|---|---|---|---|---|---|---|---|---|---|---|---|---|---|---|---|---|---|---|---|---|---|---|---|---|---|---|---|---|---|---|---|---|---|---|---|---|---|---|---|---|---|---|---|---|---|---|---|---|---|---|---|---|---|---|---|---|---|---|---|---|---|---|---|---|---|---|---|---|---|---|---|---|---|---|---|---|---|---|---|---|---|---|---|---|---|---|---|---|---|---|---|---|---|---|---|---|---|---|---|---|---|---|---|---|---|---|---|---|---|---|---|---|---|---|---|---|---|---|---|---|---|---|---|---|---|---|---|---|---|---|---|---|---|---|---|---|---|---|---|---|---|---|---|---|---|---|---|---|---|---|---|---|---|---|---|---|---|---|---|---|---|---|---|---|---|---|---|---|---|---|---|---|---|---|---|---|---|---|---|---|---|---|---|---|---|---|---|---|---|---|---|---|---|---|---|---|---|---|---|---|---|---|---|---|---|---|---|---|---|---|---|---|---|---|---|---|---|---|---|---|---|---|---|---|---|---|---|---|---|---|---|---|---|---|---|---|---|---|---|---|---|---|---|---|---|---|---|---|---|---|---|---|---|---|---|---|---|---|---|---|---|---|---|---|---|---|---|---|---|---|---|---|---|---|---|---|---|---|---|---|---|---|---|---|---|---|---|---|---|---|---|---|---|---|---|---|---|---|---|---|---|---|---|---|---|---|---|---|---|---|---|---|---|---|---|---|---|---|---|---|---|---|---|---|---|---|---|---|---|---|---|---|---|---|---|---|---|---|---|---|---|---|---|---|---|---|---|---|---|---|---|---|---|---|---|---|---|---|---|---|---|---|---|---|---|---|---|---|---|---|---|---|---|---|---|---|---|---|---|---|---|---|---|---|---|---|---|---|---|---|---|---|---|---|---|---|---|---|---|---|---|---|---|---|---|---|---|---|---|---|---|---|---|---|---|---|---|---|---|---|---|---|---|---|---|---|---|---|---|---|---|---|---|---|---|---|---|---|---|---|---|---|---|---|---|---|---|---|---|---|---|---|---|---|---|---|---|---|---|---|---|---|---|---|---|---|---|---|---|---|---|---|---|---|---|---|---|---|---|---|---|---|---|---|---|---|---|---|---|---|---|---|---|---|---|---|---|---|---|---|---|---|---|---|---|---|---|---|---|---|---|---|---|---|---|---|---|---|---|---|---|---|---|---|---|---|---|---|---|---|---|---|---|---|---|---|---|---|---|---|---|---|---|---|---|---|---|---|---|---|---|---|---|---|---|---|---|---|---|---|---|---|---|---|---|---|---|---|---|---|---|---|---|---|---|---|---|---|---|---|---|---|---|---|---|---|---|---|---|---|---|---|---|---|---|---|---|---|---|---|---|---|---|---|---|---|---|---|---|---|---|---|---|---|---|---|---|---|---|---|---|---|---|---|---|---|---|---|---|---|---|---|---|---|---|---|---|---|---|---|---|---|---|---|---|---|---|---|---|---|---|---|---|---|---|---|---|---|---|---|---|---|---|---|---|---|---|---|---|---|---|---|---|---|---|---|---|---|---|---|---|---|---|---|---|---|---|---|---|---|---|---|---|---|---|---|---|---|---|---|---|---|---|---|---|---|---|---|---|---|---|---|---|---|---|---|---|---|---|---|---|---|---|---|---|---|---|---|---|---|---|---|---|---|---|---|---|---|---|---|---|---|---|---|---|---|---|---|---|---|---|---|---|---|---|---|---|---|---|---|---|---|---|---|---|---|---|---|---|---|---|---|---|---|---|---|---|---|---|---|---|---|---|---|---|---|-----|
| Alpha-Latrotoxin L7XP2  | S. grossa     | /          | E | D | V | E | L | T | K | L | E | E  | K  | A  | E  | I  | C  | S  | E  | L  | E  | L  | Q  | Q  | K  | Y  | A  | D  | I  | A  | A  | N  | I  | I  | G  | D  | L  | S  | S  | L  | P  | M  | V  | G  | K  | I  | V  | G  | T  | M  | A  | A  | A |   |   |   |   |   |   |   |   |   |   |   |   |   |   |   |   |   |   |   |   |   |   |   |   |   |   |   |   |   |   |   |   |   |   |   |   |   |   |   |   |   |   |   |   |   |   |   |   |   |   |   |   |   |   |   |   |   |   |   |   |   |   |   |   |   |   |   |   |   |   |   |   |   |   |   |   |   |   |   |   |   |   |   |   |   |   |   |   |   |   |   |   |   |   |   |   |   |   |   |   |   |   |   |   |   |   |   |   |   |   |   |   |   |   |   |   |   |   |   |   |   |   |   |   |   |   |   |   |   |   |   |   |   |   |   |   |   |   |   |   |   |   |   |   |   |   |   |   |   |   |   |   |   |   |   |   |   |   |   |   |   |   |   |   |   |   |   |   |   |   |   |   |   |   |   |   |   |   |   |   |   |   |   |   |   |   |   |   |   |   |   |   |   |   |   |   |   |   |   |   |   |   |   |   |   |   |   |   |   |   |   |   |   |   |   |   |   |   |   |   |   |   |   |   |   |   |   |   |   |   |   |   |   |   |   |   |   |   |   |   |   |   |   |   |   |   |   |   |   |   |   |   |   |   |   |   |   |   |   |   |   |   |   |   |   |   |   |   |   |   |   |   |   |   |   |   |   |   |   |   |   |   |   |   |   |   |   |   |   |   |   |   |   |   |   |   |   |   |   |   |   |   |   |   |   |   |   |   |   |   |   |   |   |   |   |   |   |   |   |   |   |   |   |   |   |   |   |   |   |   |   |   |   |   |   |   |   |   |   |   |   |   |   |   |   |   |   |   |   |   |   |   |   |   |   |   |   |   |   |   |   |   |   |   |   |   |   |   |   |   |   |   |   |   |   |   |   |   |   |   |   |   |   |   |   |   |   |   |   |   |   |   |   |   |   |   |   |   |   |   |   |   |   |   |   |   |   |   |   |   |   |   |   |   |   |   |   |   |   |   |   |   |   |   |   |   |   |   |   |   |   |   |   |   |   |   |   |   |   |   |   |   |   |   |   |   |   |   |   |   |   |   |   |   |   |   |   |   |   |   |   |   |   |   |   |   |   |   |   |   |   |   |   |   |   |   |   |   |   |   |   |   |   |   |   |   |   |   |   |   |   |   |   |   |   |   |   |   |   |   |   |   |   |   |   |   |   |   |   |   |   |   |   |   |   |   |   |   |   |   |   |   |   |   |   |   |   |   |   |   |   |   |   |   |   |   |   |   |   |   |   |   |   |   |   |   |   |   |   |   |   |   |   |   |   |   |   |   |   |   |   |   |   |   |   |   |   |   |   |   |   |   |   |   |   |   |   |   |   |   |   |   |   |   |   |   |   |   |   |   |   |   |   |   |   |   |   |   |   |   |   |   |   |   |   |   |   |   |   |   |   |   |   |   |   |   |   |   |   |   |   |   |   |   |   |   |   |   |   |   |   |   |   |   |   |   |   |   |   |   |   |   |   |   |   |   |   |   |   |   |   |   |   |   |   |   |   |   |   |   |   |   |   |   |   |   |   |   |   |   |   |   |   |   |   |   |   |   |   |   |   |   |   |   |   |   |   |   |   |   |   |   |   |   |   |   |   |   |   |   |   |   |   |   |   |   |   |   |   |   |   |   |   |   |   |   |   |   |   |   |   |   |   |   |   |   |   |   |   |   |   |   |   |   |   |   |   |   |   |   |   |   |   |   |   |   |   |   |   |   |   |   |   |   |   |   |   |   |   |   |   |   |   |   |   |   |   |   |   |   |   |   |   |   |   |   |   |   |   |   |   |   |   |   |   |   |   |   |   |   |   |   |   |   |   |   |   |   |   |   |   |   |   |   |   |   |   |   |   |   |   |   |   |   |   |   |   |   |   |   |   |   |   |   |   |   |   |   |   |   |   |   |   |   |   |   |   |   |   |   |   |   |   |   |   |   |   |   |   |   |   |   |   |   |   |   |   |   |   |   |   |   |   |   |   |   |   |   |   |   |   |   |   |   |   |   |   |   |   |   |   |   |   |   |   |   |   |   |   |   |   |   |   |   |   |   |   |   |   |   |   |   |   |   |   |   |   |   |   |   |   |   |   |   |   |   |   |   |   |   |   |   |   |   |   |   |   |   |   |   |   |   |   |   |   |   |   |   |   |   |   |   |   |   |   |   |   |   |   |   |   |   |   |   |   |   |   |   |   |   |   |   |   |   |   |   |   |   |   |   |   |   |   |   |   |   |   |   |   |   |   |   |   |   |   |   |   |   |   |   |   |   |   |   |   |   |   |   |   |   |   |   |   |   |   |   |   |   |   |   |   |   |   |   |   |   |   |   |   |   |   |   |   |   |   |   |   |   |   |   |   |   |   |   |   |   |   |   |   |   |   |   |   |   |   |   |   |   |   |   |   |   |   |   |   |   |   |   |   |   |   |   |   |   |   |   |   |   |   |   |   |   |   |   |   |   |   |   |   |   |   |   |   |   |   |   |   |   |   |   |   |   |   |   |   |   |   |   |   |   |   |   |   |   |   |   |   |   |   |   |   |   |   |   |   |   |   |   |   |   |   |   |   |   |   |   |   |   |   |   |   |   |   |   |   |   |   |   |   |   |   |   |   |   |   |   |   |   |   |   |   |   |   |   |   |   |   |   |     |
| Alpha-Latrotoxin L7XCUD | L. gennepicus | /          | - | N | E | E | E | L | T | L | E | E  | K  | A  | E  | I  | C  | S  | E  | L  | E  | L  | Q  | Q  | K  | Y  | A  | D  | I  | A  | A  | N  | I  | I  | G  | D  | L  | S  | S  | L  | P  | M  | V  | G  | K  | I  | V  | G  | T  | M  | A  | A  | A |   |   |   |   |   |   |   |   |   |   |   |   |   |   |   |   |   |   |   |   |   |   |   |   |   |   |   |   |   |   |   |   |   |   |   |   |   |   |   |   |   |   |   |   |   |   |   |   |   |   |   |   |   |   |   |   |   |   |   |   |   |   |   |   |   |   |   |   |   |   |   |   |   |   |   |   |   |   |   |   |   |   |   |   |   |   |   |   |   |   |   |   |   |   |   |   |   |   |   |   |   |   |   |   |   |   |   |   |   |   |   |   |   |   |   |   |   |   |   |   |   |   |   |   |   |   |   |   |   |   |   |   |   |   |   |   |   |   |   |   |   |   |   |   |   |   |   |   |   |   |   |   |   |   |   |   |   |   |   |   |   |   |   |   |   |   |   |   |   |   |   |   |   |   |   |   |   |   |   |   |   |   |   |   |   |   |   |   |   |   |   |   |   |   |   |   |   |   |   |   |   |   |   |   |   |   |   |   |   |   |   |   |   |   |   |   |   |   |   |   |   |   |   |   |   |   |   |   |   |   |   |   |   |   |   |   |   |   |   |   |   |   |   |   |   |   |   |   |   |   |   |   |   |   |   |   |   |   |   |   |   |   |   |   |   |   |   |   |   |   |   |   |   |   |   |   |   |   |   |   |   |   |   |   |   |   |   |   |   |   |   |   |   |   |   |   |   |   |   |   |   |   |   |   |   |   |   |   |   |   |   |   |   |   |   |   |   |   |   |   |   |   |   |   |   |   |   |   |   |   |   |   |   |   |   |   |   |   |   |   |   |   |   |   |   |   |   |   |   |   |   |   |   |   |   |   |   |   |   |   |   |   |   |   |   |   |   |   |   |   |   |   |   |   |   |   |   |   |   |   |   |   |   |   |   |   |   |   |   |   |   |   |   |   |   |   |   |   |   |   |   |   |   |   |   |   |   |   |   |   |   |   |   |   |   |   |   |   |   |   |   |   |   |   |   |   |   |   |   |   |   |   |   |   |   |   |   |   |   |   |   |   |   |   |   |   |   |   |   |   |   |   |   |   |   |   |   |   |   |   |   |   |   |   |   |   |   |   |   |   |   |   |   |   |   |   |   |   |   |   |   |   |   |   |   |   |   |   |   |   |   |   |   |   |   |   |   |   |   |   |   |   |   |   |   |   |   |   |   |   |   |   |   |   |   |   |   |   |   |   |   |   |   |   |   |   |   |   |   |   |   |   |   |   |   |   |   |   |   |   |   |   |   |   |   |   |   |   |   |   |   |   |   |   |   |   |   |   |   |   |   |   |   |   |   |   |   |   |   |   |   |   |   |   |   |   |   |   |   |   |   |   |   |   |   |   |   |   |   |   |   |   |   |   |   |   |   |   |   |   |   |   |   |   |   |   |   |   |   |   |   |   |   |   |   |   |   |   |   |   |   |   |   |   |   |   |   |   |   |   |   |   |   |   |   |   |   |   |   |   |   |   |   |   |   |   |   |   |   |   |   |   |   |   |   |   |   |   |   |   |   |   |   |   |   |   |   |   |   |   |   |   |   |   |   |   |   |   |   |   |   |   |   |   |   |   |   |   |   |   |   |   |   |   |   |   |   |   |   |   |   |   |   |   |   |   |   |   |   |   |   |   |   |   |   |   |   |   |   |   |   |   |   |   |   |   |   |   |   |   |   |   |   |   |   |   |   |   |   |   |   |   |   |   |   |   |   |   |   |   |   |   |   |   |   |   |   |   |   |   |   |   |   |   |   |   |   |   |   |   |   |   |   |   |   |   |   |   |   |   |   |   |   |   |   |   |   |   |   |   |   |   |   |   |   |   |   |   |   |   |   |   |   |   |   |   |   |   |   |   |   |   |   |   |   |   |   |   |   |   |   |   |   |   |   |   |   |   |   |   |   |   |   |   |   |   |   |   |   |   |   |   |   |   |   |   |   |   |   |   |   |   |   |   |   |   |   |   |   |   |   |   |   |   |   |   |   |   |   |   |   |   |   |   |   |   |   |   |   |   |   |   |   |   |   |   |   |   |   |   |   |   |   |   |   |   |   |   |   |   |   |   |   |   |   |   |   |   |   |   |   |   |   |   |   |   |   |   |   |   |   |   |   |   |   |   |   |   |   |   |   |   |   |   |   |   |   |   |   |   |   |   |   |   |   |   |   |   |   |   |   |   |   |   |   |   |   |   |   |   |   |   |   |   |   |   |   |   |   |   |   |   |   |   |   |   |   |   |   |   |   |   |   |   |   |   |   |   |   |   |   |   |   |   |   |   |   |   |   |   |   |   |   |   |   |   |   |   |   |   |   |   |   |   |   |   |   |   |   |   |   |   |   |   |   |   |   |   |   |   |   |   |   |   |   |   |   |   |   |   |   |   |   |   |   |   |   |   |   |   |   |   |   |   |   |   |   |   |   |   |   |   |   |   |   |   |   |   |   |   |   |   |   |   |   |   |   |   |   |   |   |   |   |   |   |   |   |   |   |   |   |   |   |   |   |   |   |   |   |   |   |   |   |   |   |   |   |   |   |   |   |   |   |   |   |   |   |   |   |   |   |   |   |   |   |   |   |   |   |   |   |   |   |   |   |   |   |   |   |   |   |   |   |   |   |   |   |   |   |   |   |   |   |   |   |   |   |   |     |
| Alpha-Latrotoxin-Sn1a   | S. nobilis    | This Study | - | - | - | - | - | - | - | - | - | -  | -  | -  | -  | -  | -  | -  | -  | -  | -  | -  | -  | -  | -  | -  | -  | -  | -  | -  | -  | -  | -  | -  | -  | -  | -  | -  | -  | -  | -  | -  | -  | -  | -  | -  | -  | -  | -  | -  | -  | -  | - | - | - |   |   |   |   |   |   |   |   |   |   |   |   |   |   |   |   |   |   |   |   |   |   |   |   |   |   |   |   |   |   |   |   |   |   |   |   |   |   |   |   |   |   |   |   |   |   |   |   |   |   |   |   |   |   |   |   |   |   |   |   |   |   |   |   |   |   |   |   |   |   |   |   |   |   |   |   |   |   |   |   |   |   |   |   |   |   |   |   |   |   |   |   |   |   |   |   |   |   |   |   |   |   |   |   |   |   |   |   |   |   |   |   |   |   |   |   |   |   |   |   |   |   |   |   |   |   |   |   |   |   |   |   |   |   |   |   |   |   |   |   |   |   |   |   |   |   |   |   |   |   |   |   |   |   |   |   |   |   |   |   |   |   |   |   |   |   |   |   |   |   |   |   |   |   |   |   |   |   |   |   |   |   |   |   |   |   |   |   |   |   |   |   |   |   |   |   |   |   |   |   |   |   |   |   |   |   |   |   |   |   |   |   |   |   |   |   |   |   |   |   |   |   |   |   |   |   |   |   |   |   |   |   |   |   |   |   |   |   |   |   |   |   |   |   |   |   |   |   |   |   |   |   |   |   |   |   |   |   |   |   |   |   |   |   |   |   |   |   |   |   |   |   |   |   |   |   |   |   |   |   |   |   |   |   |   |   |   |   |   |   |   |   |   |   |   |   |   |   |   |   |   |   |   |   |   |   |   |   |   |   |   |   |   |   |   |   |   |   |   |   |   |   |   |   |   |   |   |   |   |   |   |   |   |   |   |   |   |   |   |   |   |   |   |   |   |   |   |   |   |   |   |   |   |   |   |   |   |   |   |   |   |   |   |   |   |   |   |   |   |   |   |   |   |   |   |   |   |   |   |   |   |   |   |   |   |   |   |   |   |   |   |   |   |   |   |   |   |   |   |   |   |   |   |   |   |   |   |   |   |   |   |   |   |   |   |   |   |   |   |   |   |   |   |   |   |   |   |   |   |   |   |   |   |   |   |   |   |   |   |   |   |   |   |   |   |   |   |   |   |   |   |   |   |   |   |   |   |   |   |   |   |   |   |   |   |   |   |   |   |   |   |   |   |   |   |   |   |   |   |   |   |   |   |   |   |   |   |   |   |   |   |   |   |   |   |   |   |   |   |   |   |   |   |   |   |   |   |   |   |   |   |   |   |   |   |   |   |   |   |   |   |   |   |   |   |   |   |   |   |   |   |   |   |   |   |   |   |   |   |   |   |   |   |   |   |   |   |   |   |   |   |   |   |   |   |   |   |   |   |   |   |   |   |   |   |   |   |   |   |   |   |   |   |   |   |   |   |   |   |   |   |   |   |   |   |   |   |   |   |   |   |   |   |   |   |   |   |   |   |   |   |   |   |   |   |   |   |   |   |   |   |   |   |   |   |   |   |   |   |   |   |   |   |   |   |   |   |   |   |   |   |   |   |   |   |   |   |   |   |   |   |   |   |   |   |   |   |   |   |   |   |   |   |   |   |   |   |   |   |   |   |   |   |   |   |   |   |   |   |   |   |   |   |   |   |   |   |   |   |   |   |   |   |   |   |   |   |   |   |   |   |   |   |   |   |   |   |   |   |   |   |   |   |   |   |   |   |   |   |   |   |   |   |   |   |   |   |   |   |   |   |   |   |   |   |   |   |   |   |   |   |   |   |   |   |   |   |   |   |   |   |   |   |   |   |   |   |   |   |   |   |   |   |   |   |   |   |   |   |   |   |   |   |   |   |   |   |   |   |   |   |   |   |   |   |   |   |   |   |   |   |   |   |   |   |   |   |   |   |   |   |   |   |   |   |   |   |   |   |   |   |   |   |   |   |   |   |   |   |   |   |   |   |   |   |   |   |   |   |   |   |   |   |   |   |   |   |   |   |   |   |   |   |   |   |   |   |   |   |   |   |   |   |   |   |   |   |   |   |   |   |   |   |   |   |   |   |   |   |   |   |   |   |   |   |   |   |   |   |   |   |   |   |   |   |   |   |   |   |   |   |   |   |   |   |   |   |   |   |   |   |   |   |   |   |   |   |   |   |   |   |   |   |   |   |   |   |   |   |   |   |   |   |   |   |   |   |   |   |   |   |   |   |   |   |   |   |   |   |   |   |   |   |   |   |   |   |   |   |   |   |   |   |   |   |   |   |   |   |   |   |   |   |   |   |   |   |   |   |   |   |   |   |   |   |   |   |   |   |   |   |   |   |   |   |   |   |   |   |   |   |   |   |   |   |   |   |   |   |   |   |   |   |   |   |   |   |   |   |   |   |   |   |   |   |   |   |   |   |   |   |   |   |   |   |   |   |   |   |   |   |   |   |   |   |   |   |   |   |   |   |   |   |   |   |   |   |   |   |   |   |   |   |   |   |   |   |   |   |   |   |   |   |   |   |   |   |   |   |   |   |   |   |   |   |   |   |   |   |   |   |   |   |   |   |   |   |   |   |   |   |   |   |   |   |   |   |   |   |   |   |   |   |   |   |   |   |   |   |   |   |   |   |   |   |   |   |   |   |   |   |   |   |   |   |   |   |   |   |   |   |   |   |   |   |   |   |   |   |   |   |   |   |   |   |   |   |   |   |   |   |   |   |   |   |   |   |   |   |   |   |   |   |   |   |   |     |
| Alpha-Latrotoxin-Sn1b   | S. nobilis    | This Study | S | K | R | D | K | A | R | D | E | K  | A  | A  | I  | C  | K  | A  | M  | E  | I  | E  | S  | L  | I  | G  | I  | A  | D  | V  | S  | S  | A  | C  | S  | G  | I  | E  | I  | V  | G  | P  | F  | A  | A  | -  | -  | -  | -  | -  | -  | -  | - | - | - | - | - | - | - | - | - | - | - | - | - | - | - | - | - | - | - | - | - | - | - | - | - | - | - | - | - | - | - | - | - | - | - | - | - | - | - | - | - | - | - | - | - | - | - | - | - | - | - | - | - | - | - | - | - | - | - | - | - | - | - | - | - | - | - | - | - | - | - | - | - | - | - | - | - | - | - | - | - | - | - | - | - | - | - | - | - | - | - | - | - | - | - | - | - | - | - | - | - | - | - | - | - | - | - | - | - | - | - | - | - | - | - | - | - | - | - | - | - | - | - | - | - | - | - | - | - | - | - | - | - | - | - | - | - | - | - | - | - | - | - | - | - | - | - | - | - | - | - | - | - | - | - | - | - | - | - | - | - | - | - | - | - | - | - | - | - | - | - | - | - | - | - | - | - | - | - | - | - | - | - | - | - | - | - | - | - | - | - | - | - | - | - | - | - | - | - | - | - | - | - | - | - | - | - | - | - | - | - | - | - | - | - | - | - | - | - | - | - | - | - | - | - | - | - | - | - | - | - | - | - | - | - | - | - | - | - | - | - | - | - | - | - | - | - | - | - | - | - | - | - | - | - | - | - | - | - | - | - | - | - | - | - | - | - | - | - | - | - | - | - | - | - | - | - | - | - | - | - | - | - | - | - | - | - | - | - | - | - | - | - | - | - | - | - | - | - | - | - | - | - | - | - | - | - | - | - | - | - | - | - | - | - | - | - | - | - | - | - | - | - | - | - | - | - | - | - | - | - | - | - | - | - | - | - | - | - | - | - | - | - | - | - | - | - | - | - | - | - | - | - | - | - | - | - | - | - | - | - | - | - | - | - | - | - | - | - | - | - | - | - | - | - | - | - | - | - | - | - | - | - | - | - | - | - | - | - | - | - | - | - | - | - | - | - | - | - | - | - | - | - | - | - | - | - | - | - | - | - | - | - | - | - | - | - | - | - | - | - | - | - | - | - | - | - | - | - | - | - | - | - | - | - | - | - | - | - | - | - | - | - | - | - | - | - | - | - | - | - | - | - | - | - | - | - | - | - | - | - | - | - | - | - | - | - | - | - | - | - | - | - | - | - | - | - | - | - | - | - | - | - | - | - | - | - | - | - | - | - | - | - | - | - | - | - | - | - | - | - | - | - | - | - | - | - | - | - | - | - | - | - | - | - | - | - | - | - | - | - | - | - | - | - | - | - | - | - | - | - | - | - | - | - | - | - | - | - | - | - | - | - | - | - | - | - | - | - | - | - | - | - | - | - | - | - | - | - | - | - | - | - | - | - | - | - | - | - | - | - | - | - | - | - | - | - | - | - | - | - | - | - | - | - | - | - | - | - | - | - | - | - | - | - | - | - | - | - | - | - | - | - | - | - | - | - | - | - | - | - | - | - | - | - | - | - | - | - | - | - | - | - | - | - | - | - | - | - | - | - | - | - | - | - | - | - | - | - | - | - | - | - | - | - | - | - | - | - | - | - | - | - | - | - | - | - | - | - | - | - | - | - | - | - | - | - | - | - | - | - | - | - | - | - | - | - | - | - | - | - | - | - | - | - | - | - | - | - | - | - | - | - | - | - | - | - | - | - | - | - | - | - | - | - | - | - | - | - | - | - | - | - | - | - | - | - | - | - | - | - | - | - | - | - | - | - | - | - | - | - | - | - | - | - | - | - | - | - | - | - | - | - | - | - | - | - | - | - | - | - | - | - | - | - | - | - | - | - | - | - | - | - | - | - | - | - | - | - | - | - | - | - | - | - | - | - | - | - | - | - | - | - | - | - | - | - | - | - | - | - | - | - | - | - | - | - | - | - | - | - | - | - | - | - | - | - | - | - | - | - | - | - | - | - | - | - | - | - | - | - | - | - | - | - | - | - | - | - | - | - | - | - | - | - | - | - | - | - | - | - | - | - | - | - | - | - | - | - | - | - | - | - | - | - | - | - | - | - | - | - | - | - | - | - | - | - | - | - | - | - | - | - | - | - | - | - | - | - | - | - | - | - | - | - | - | - | - | - | - | - | - | - | - | - | - | - | - | - | - | - | - | - | - | - | - | - | - | - | - | - | - | - | - | - | - | - | - | - | - | - | - | - | - | - | - | - | - | - | - | - | - | - | - | - | - | - | - | - | - | - | - | - | - | - | - | - | - | - | - | - | - | - | - | - | - | - | - | - | - | - | - | - | - | - | - | - | - | - | - | - | - | - | - | - | - | - | - | - | - | - | - | - | - | - | - | - | - | - | - | - | - | - | - | - | - | - | - | - | - | - | - | - | - | - | - | - | - | - | - | - | - | - | - | - | - | - | - | - | - | - | - | - | - | - | - | - | - | - | - | - | - | - | - | - | - | - | - | - | - | - | - | - | - | - | - | - | - | - | - | - | - | - | - | - | - | - | - | - | - | - | - | - | - | - | - | - | - | - | - | - | - | - | - | - | - | - | - | - | - | - | - | - | - | - | - | - | - | - | - | - | - | - | - | - | - | - | - | - | - | - | - | - | - | - | - | - | - | - | - | - | - | - | - | - | - | - | - | - | - | - | - | - | - | - | - | - | - | - | - | - | - | - | - | - | - | - | - | - | - | - | - | - | - | - | - | - | - | - | - | - | - | - | - | - | - | - | - | - | -</ |

**Supplementary dataset 2 – Table 3b- Alpha-Latrotoxins- Sequences from position 501 to 950:** Sequence alignments of the closest two alpha-latrotoxins already published and the five most abundant found in the venom of *Steatoda nobilis*. Yellow windows indicate positions where the identity and/or the physico-chemical properties of the aminoacids is maintained at least for 4 possibilities over 7, bold positions are the ones where the positions are maintained 2 or 3 times (over 7). Cysteines are highlighted in red.

| IDENTIFICATION          | SPECIES               | REF                        | 501 | 502 | 503 | 504 | 505 | 506 | 507 | 508 | 509 | 510 | 511 | 512 | 513 | 514 | 515 | 516 | 517 | 518 | 519 | 520 | 521 | 522 | 523 | 524 | 525 | 526 | 527 | 528 | 529 | 530 | 531 | 532 | 533 | 534 | 535 | 536 | 537 | 538 | 539 | 540 | 541 | 542 | 543 | 544 | 545 | 546 | 547 | 548 | 549 | 550 |   |
|-------------------------|-----------------------|----------------------------|-----|-----|-----|-----|-----|-----|-----|-----|-----|-----|-----|-----|-----|-----|-----|-----|-----|-----|-----|-----|-----|-----|-----|-----|-----|-----|-----|-----|-----|-----|-----|-----|-----|-----|-----|-----|-----|-----|-----|-----|-----|-----|-----|-----|-----|-----|-----|-----|-----|-----|---|
| Alpha-Latrotoxin L7XBP2 | <i>S. grossa</i>      | /                          | R   | L   | L   | E   | S   | P   | D   | I   | N   | I   | N   | E   | K   | D   | K   | D   | G   | F   | T   | P   | L   | H   | S   | A   | V   | L   | G   | G   | K   | E   | I   | V   | K   | A   | F   | I   | N   | Q   | P   | G   | T   | D   | I   | N   | A   | K   | S   | E   | -   | K   |   |
| Alpha-Latrotoxin L7XCUD | <i>L. geometricus</i> | /                          | R   | L   | L   | M   | E   | S   | P   | E   | I   | N   | I   | N   | E   | R   | D   | K   | D   | G   | F   | T   | P   | L   | H   | Y   | A   | V   | L   | G   | G   | E   | R   | I   | L   | E   | A   | F   | I   | N   | Q   | A   | G   | I   | D   | V   | N   | V   | K   | S   | D   | -   | K |
| Alpha-Latrotoxin-Sn1a   | <i>S. nobilis</i>     | <a href="#">This Study</a> | T   | L   | L   | A   | S   | P   | K   | I   | N   | I   | N   | E   | R   | S   | R   | S   | F   | T   | A   | L   | H   | N   | A   | V   | L   | G   | G   | R   | V   | D   | S   | A   | V   | I   | S   | H   | D   | R   | I   | D   | I   | N   | A   | K   | S   | K   | -   | T   |     |     |   |
| Alpha-Latrotoxin-Sn1b   | <i>S. nobilis</i>     | <a href="#">This Study</a> | S   | L   | L   | I   | E   | R   | P   | G   | I   | E   | L   | N   | K   | D   | K   | N   | G   | F   | T   | P   | L   | H   | F   | A   | V   | L   | G   | G   | R   | V   | K   | L   | L   | V   | S   | K   | T   | D   | T   | K   | V   | N   | E   | K   | S   | N   | -   | L   |     |     |   |
| Alpha-Latrotoxin-Sn1c   | <i>S. nobilis</i>     | <a href="#">This Study</a> | R   | L   | L   | E   | S   | P   | E   | I   | N   | I   | N   | E   | R   | N   | E   | E   | G   | F   | T   | P   | L   | H   | Y   | A   | V   | L   | G   | G   | K   | F   | I   | V   | M   | E   | F   | I   | K   | R   | K   | E   | T   | E   | I   | N   | P   | R   | S   | A   | K   | K   |   |
| Alpha-Latrotoxin-Sn1d   | <i>S. nobilis</i>     | <a href="#">This Study</a> | R   | L   | L   | E   | S   | P   | D   | I   | K   | I   | N   | E   | R   | N   | E   | E   | G   | F   | T   | P   | L   | H   | Y   | A   | V   | L   | G   | G   | K   | L   | M   | I   | T   | V   | F   | M   | K   | N   | S   | K   | T   | E   | I   | N   | P   | R   | S   | T   | K   | K   |   |
| Alpha-Latrotoxin-Sn1e   | <i>S. nobilis</i>     | <a href="#">This Study</a> | R   | L   | L   | E   | S   | P   | D   | I   | K   | I   | N   | E   | R   | N   | E   | E   | G   | F   | T   | P   | L   | H   | Y   | A   | V   | L   | G   | G   | K   | L   | M   | I   | T   | V   | F   | M   | K   | N   | S   | K   | T   | E   | I   | N   | P   | R   | S   | T   | K   | K   |   |

  

| IDENTIFICATION          | SPECIES               | REF                        | 551 | 552 | 553 | 554 | 555 | 556 | 557 | 558 | 559 | 560 | 561 | 562 | 563 | 564 | 565 | 566 | 567 | 568 | 569 | 570 | 571 | 572 | 573 | 574 | 575 | 576 | 577 | 578 | 579 | 580 | 581 | 582 | 583 | 584 | 585 | 586 | 587 | 588 | 589 | 590 | 591 | 592 | 593 | 594 | 595 | 596 | 597 | 598 | 599 | 600 |   |
|-------------------------|-----------------------|----------------------------|-----|-----|-----|-----|-----|-----|-----|-----|-----|-----|-----|-----|-----|-----|-----|-----|-----|-----|-----|-----|-----|-----|-----|-----|-----|-----|-----|-----|-----|-----|-----|-----|-----|-----|-----|-----|-----|-----|-----|-----|-----|-----|-----|-----|-----|-----|-----|-----|-----|-----|---|
| Alpha-Latrotoxin L7XBP2 | <i>S. grossa</i>      | /                          | G   | L   | T   | P   | F   | H   | L   | A   | I   | I   | N   | D   | D   | W   | P   | -   | -   | -   | -   | V   | A   | S   | T   | L   | L   | R   | S   | E   | S   | L   | Q   | V   | N   | A   | N   | D   | E   | N   | N   | N   | T   | P   | L   | H   | Y   | A   | V   | M   | L   | G   |   |
| Alpha-Latrotoxin L7XCUD | <i>L. geometricus</i> | /                          | G   | L   | T   | P   | F   | H   | L   | A   | I   | I   | N   | D   | D   | W   | P   | -   | -   | -   | -   | V   | A   | S   | T   | L   | L   | R   | S   | E   | S   | L   | Q   | V   | N   | A   | N   | D   | E   | N   | N   | N   | T   | P   | L   | H   | Y   | A   | V   | M   | L   | G   |   |
| Alpha-Latrotoxin-Sn1a   | <i>S. nobilis</i>     | <a href="#">This Study</a> | G   | L   | T   | P   | F   | H   | L   | A   | I   | I   | N   | D   | D   | R   | D   | -   | -   | -   | -   | V   | A   | S   | T   | L   | L   | R   | S   | E   | S   | L   | Q   | V   | N   | A   | N   | D   | E   | N   | N   | N   | T   | P   | L   | H   | Y   | A   | V   | M   | L   | G   |   |
| Alpha-Latrotoxin-Sn1b   | <i>S. nobilis</i>     | <a href="#">This Study</a> | H   | L   | T   | P   | F   | H   | L   | A   | V   | M   | K   | D   | V   | N   | Q   | E   | F   | N   | K   | T   | L   | M   | A   | L   | L   | I   | G   | S   | G   | R   | V   | N   | I   | N   | E   | G   | N   | D   | N   | N   | M   | T   | A   | L   | H   | F   | A   | C   | F   | G   | D |
| Alpha-Latrotoxin-Sn1c   | <i>S. nobilis</i>     | <a href="#">This Study</a> | E   | L   | T   | P   | F   | H   | L   | A   | V   | I   | N   | D   | I   | P   | -   | -   | -   | -   | -   | V   | A   | Q   | N   | L   | I   | Q   | S   | Q   | L   | K   | E   | V   | N   | A   | G   | D   | K   | D   | R   | S   | K   | T   | S   | H   | Y   | A   | V   | M   | L   | G   |   |
| Alpha-Latrotoxin-Sn1d   | <i>S. nobilis</i>     | <a href="#">This Study</a> | E   | L   | T   | P   | F   | H   | M   | A   | V   | I   | N   | D   | L   | P   | -   | -   | -   | -   | -   | V   | V   | Q   | T   | L   | M   | E   | S   | R   | K   | I   | E   | I   | N   | A   | G   | D   | K   | N   | N   | M   | A   | P   | L   | H   | Y   | S   | A   | M   | L   | G   |   |
| Alpha-Latrotoxin-Sn1e   | <i>S. nobilis</i>     | <a href="#">This Study</a> | E   | L   | T   | P   | F   | H   | M   | A   | V   | I   | N   | D   | L   | P   | -   | -   | -   | -   | -   | V   | V   | Q   | T   | L   | M   | E   | S   | R   | K   | I   | E   | I   | N   | A   | G   | D   | K   | N   | N   | M   | A   | P   | L   | H   | Y   | S   | A   | M   | L   | G   |   |

  

| IDENTIFICATION          | SPECIES               | REF                        | 601 | 602 | 603 | 604 | 605 | 606 | 607 | 608 | 609 | 610 | 611 | 612 | 613 | 614 | 615 | 616 | 617 | 618 | 619 | 620 | 621 | 622 | 623 | 624 | 625 | 626 | 627 | 628 | 629 | 630 | 631 | 632 | 633 | 634 | 635 | 636 | 637 | 638 | 639 | 640 | 641 | 642 | 643 | 644 | 645 | 646 | 647 | 648 | 649 | 650 |   |
|-------------------------|-----------------------|----------------------------|-----|-----|-----|-----|-----|-----|-----|-----|-----|-----|-----|-----|-----|-----|-----|-----|-----|-----|-----|-----|-----|-----|-----|-----|-----|-----|-----|-----|-----|-----|-----|-----|-----|-----|-----|-----|-----|-----|-----|-----|-----|-----|-----|-----|-----|-----|-----|-----|-----|-----|---|
| Alpha-Latrotoxin L7XBP2 | <i>S. grossa</i>      | /                          | F   | -   | L   | E   | I   | M   | K   | K   | L   | I   | N   | L   | S   | Q   | V   | N   | V   | N   | A   | V   | S   | I   | P   | N   | L   | W   | S   | A   | L   | H   | Y   | A   | I   | F   | F   | K   | R   | D   | D   | V   | T   | L   | E   | L   | L   | K   | I   | L   | K   | V   |   |
| Alpha-Latrotoxin L7XCUD | <i>L. geometricus</i> | /                          | F   | -   | L   | E   | T   | M   | K   | K   | L   | I   | N   | L   | S   | Q   | V   | N   | V   | N   | A   | V   | S   | I   | P   | N   | L   | W   | S   | A   | L   | H   | Y   | A   | I   | F   | F   | K   | R   | D   | D   | V   | T   | L   | E   | L   | L   | K   | I   | L   | K   | V   |   |
| Alpha-Latrotoxin-Sn1a   | <i>S. nobilis</i>     | <a href="#">This Study</a> | N   | Y   | A   | E   | M   | V   | R   | Y   | L   | M   | I   | N   | L   | S   | Q   | V   | N   | V   | N   | A   | V   | S   | I   | P   | N   | L   | W   | S   | A   | L   | H   | Y   | A   | I   | F   | F   | K   | R   | D   | D   | V   | T   | L   | E   | L   | L   | K   | I   | L   | K   | V |
| Alpha-Latrotoxin-Sn1b   | <i>S. nobilis</i>     | <a href="#">This Study</a> | N   | S   | V   | A   | K   | I   | Q   | F   | L   | N   | L   | K   | D   | I   | N   | V   | N   | A   | K   | T   | I   | D   | N   | N   | W   | S   | T   | A   | L   | H   | Y   | A   | I   | F   | F   | K   | R   | D   | D   | V   | T   | L   | E   | L   | L   | K   | I   | L   | K   | V   |   |
| Alpha-Latrotoxin-Sn1c   | <i>S. nobilis</i>     | <a href="#">This Study</a> | H   | -   | S   | K   | M   | T   | Q   | Y   | L   | L   | S   | L   | D   | R   | I   | N   | P   | N   | M   | A   | T   | T   | D   | S   | K   | W   | S   | P   | L   | H   | Y   | A   | I   | F   | F   | K   | R   | D   | D   | V   | T   | L   | E   | L   | L   | K   | I   | L   | K   | V   |   |
| Alpha-Latrotoxin-Sn1d   | <i>S. nobilis</i>     | <a href="#">This Study</a> | H   | -   | S   | K   | M   | T   | Q   | Y   | L   | L   | S   | L   | D   | R   | I   | N   | P   | N   | M   | A   | T   | T   | D   | S   | K   | W   | S   | P   | L   | H   | Y   | A   | I   | F   | F   | K   | R   | D   | D   | V   | T   | L   | E   | L   | L   | K   | I   | L   | K   | V   |   |
| Alpha-Latrotoxin-Sn1e   | <i>S. nobilis</i>     | <a href="#">This Study</a> | H   | -   | S   | K   | M   | T   | Q   | Y   | L   | L   | S   | L   | D   | R   | I   | N   | P   | N   | M   | A   | T   | T   | D   | S   | K   | W   | S   | P   | L   | H   | Y   | A   | I   | F   | F   | K   | R   | D   | D   | V   | T   | L   | E   | L   | L   | K   | I   | L   | K   | V   |   |

  

| IDENTIFICATION          | SPECIES               | REF                        | 651 | 652 | 653 | 654 | 655 | 656 | 657 | 658 | 659 | 660 | 661 | 662 | 663 | 664 | 665 | 666 | 667 | 668 | 669 | 670 | 671 | 672 | 673 | 674 | 675 | 676 | 677 | 678 | 679 | 680 | 681 | 682 | 683 | 684 | 685 | 686 | 687 | 688 | 689 | 690 | 691 | 692 | 693 | 694 | 695 | 696 | 697 | 698 | 699 | 700 |   |
|-------------------------|-----------------------|----------------------------|-----|-----|-----|-----|-----|-----|-----|-----|-----|-----|-----|-----|-----|-----|-----|-----|-----|-----|-----|-----|-----|-----|-----|-----|-----|-----|-----|-----|-----|-----|-----|-----|-----|-----|-----|-----|-----|-----|-----|-----|-----|-----|-----|-----|-----|-----|-----|-----|-----|-----|---|
| Alpha-Latrotoxin L7XBP2 | <i>S. grossa</i>      | /                          | D   | K   | F   | L   | Q   | S   | L   | G   | D   | I   | T   | P   | L   | H   | L   | A   | V   | M   | Q   | G   | R   | K   | Q   | V   | L   | S   | E   | M   | R   | I   | G   | I   | G   | I   | G   | I   | N   | Q   | K   | T   | A   | E   | K   | Y   | T   | P   | L   | H   | L   | A   | A |
| Alpha-Latrotoxin L7XCUD | <i>L. geometricus</i> | /                          | N   | Y   | N   | L   | K   | A   | I   | Q   | D   | I   | T   | P   | L   | H   | L   | A   | V   | M   | Q   | G   | R   | K   | Q   | V   | L   | S   | E   | M   | R   | I   | G   | I   | G   | I   | N   | Q   | K   | T   | A   | E   | K   | Y   | T   | P   | L   | H   | L   | A   | A   |     |   |
| Alpha-Latrotoxin-Sn1a   | <i>S. nobilis</i>     | <a href="#">This Study</a> | N   | K   | A   | L   | K   | A   | D   | G   | D   | I   | T   | P   | L   | H   | L   | A   | V   | T   | F   | G   | R   | K   | Q   | V   | L   | S   | E   | M   | R   | I   | G   | I   | G   | I   | N   | Q   | K   | T   | A   | E   | K   | Y   | T   | P   | L   | H   | L   | A   | A   |     |   |
| Alpha-Latrotoxin-Sn1b   | <i>S. nobilis</i>     | <a href="#">This Study</a> | N   | V   | D   | L   | P   | D   | S   | K   | G   | V   | T   | P   | L   | A   | A   | V   | A   | A   | V   | S   | G   | S   | G   | V   | L   | S   | E   | M   | R   | I   | G   | I   | G   | I   | N   | Q   | K   | T   | A   | E   | K   | Y   | T   | P   | L   | H   | L   | A   | A   |     |   |
| Alpha-Latrotoxin-Sn1c   | <i>S. nobilis</i>     | <a href="#">This Study</a> | D   | S   | K   | K   | A   | D   | S   | D   | N   | T   | P   | L   | H   | F   | A   | V   | I   | F   | E   | R   | K   | N   | V   | L   | S   | K   | L   | L   | T   | R   | N   | V   | N   | L   | E   | A   | K   | T   | K   | E   | G   | Y   | T   | P   | L   | H   | L   | A   | A   |     |   |
| Alpha-Latrotoxin-Sn1d   | <i>S. nobilis</i>     | <a href="#">This Study</a> | D   | S   | L   | K   | A   | D   | S   | D   | S   | T   | P   | L   | H   | F   | A   | V   | I   | F   | E   | R   | K   | N   | V   | L   | S   | K   | L   | L   | T   | R   | N   | V   | N   | L   | E   | A   | K   | T   | K   | E   | G   | Y   | T   | P   | L   | H   | L   | A   | A   |     |   |
| Alpha-Latrotoxin-Sn1e   | <i>S. nobilis</i>     | <a href="#">This Study</a> | D   | S   | L   | K   | A   | D   | S   | D   | S   | T   | P   | L   | H   | F   | A   | V   | I   | F   | E   | R   | K   | N   | V   | L   | S   | K   | L   | L   | T   | R   | N   | V   | N   | L   | E   | A   | K   | T   | K   | E   | G   | Y   | T   | P   | L   | H   | L   | A   | A   |     |   |

  

| IDENTIFICATION          | SPECIES               | REF                        | 701 | 702 | 703 | 704 | 705 | 706 | 707 | 708 | 709 | 710 | 711 | 712 | 713 | 714 | 715 | 716 | 717 | 718 | 719 | 720 | 721 | 722 | 723 | 724 | 725 | 726 | 727 | 728 | 729 | 730 | 731 | 732 | 733 | 734 | 735 | 736 | 737 | 738 | 739 | 740 | 741 | 742 | 743 | 744 | 745 | 746 | 747 | 748 | 749 | 750 |   |
|-------------------------|-----------------------|----------------------------|-----|-----|-----|-----|-----|-----|-----|-----|-----|-----|-----|-----|-----|-----|-----|-----|-----|-----|-----|-----|-----|-----|-----|-----|-----|-----|-----|-----|-----|-----|-----|-----|-----|-----|-----|-----|-----|-----|-----|-----|-----|-----|-----|-----|-----|-----|-----|-----|-----|-----|---|
| Alpha-Latrotoxin L7XBP2 | <i>S. grossa</i>      | /                          | M   | S   | K   | Y   | P   | E   | I   | V   | T   | F   | L   | I   | D   | Q   | G   | S   | N   | M   | E   | A   | K   | T   | A   | N   | G   | A   | T   | P   | L   | L   | N   | L   | A   | T   | L   | K   | G   | R   | E   | Q   | A   | S   | M   | I   | L   | L   | G   | N   | E   | V   | N |
| Alpha-Latrotoxin L7XCUD | <i>L. geometricus</i> | /                          | M   | S   | K   | Y   | P   | E   | I   | V   | T   | F   | L   | I   | D   | Q   | G   | S   | N   | M   | E   | A   | K   | T   | I   | T   | G   | A   | T   | P   | L   | L   | N   | L   | A   | T   | L   | K   | G   | R   | E   | Q   | A   | S   | M   | I   | L   | L   | K   | D   | E   | V   | N |
| Alpha-Latrotoxin-Sn1a   | <i>S. nobilis</i>     | <a href="#">This Study</a> | L   | R   | K   | E   | R   | E   | L   | I   | A   | S   | L   | P   | I   | N   | D   | F   | D   | V   | N   | G   | K   | T   | T   | D   | G   | S   | T   | P   | L   | H   | L   | A   | I   | S   | R   | N   | N   | T   | E   | P   | A   | K   | F   | L   | L   | E   | N   | A   | D   |     |   |
| Alpha-Latrotoxin-Sn1b   | <i>S. nobilis</i>     | <a href="#">This Study</a> | M   | R   | E   | D   | P   | E   | M   | L   | S   | V   | L   | L   | N   | N   | R   | A   | N   | I   | E   | A   | K   | T   | I   | N   | E   | S   | T   | P   | L   | H   | L   | A   | T   | F   | T   | G   | R   | S   | K   | T   | A   | L   | T   | L   | I   | D   | R   | G   | A   | S   |   |
| Alpha-Latrotoxin-Sn1c   | <i>S. nobilis</i>     | <a href="#">This Study</a> | M   | R   | E   | D   | P   | E   | M   | L   | S   | V   | L   | L   | N   | N   | R   | A   | N   | I   | E   | A   | K   | T   | I   | N   | E   | S   | T   | P   | L   | H   | L   | A   | T   | F   | T   | G   | R   | S   | K   | T   | A   | L   | T   | L   | I   | D   | R   | G   | A   | S   |   |

  

| IDENTIFICATION | SPECIES | REF | 751 | 752 | 753 | 754 | 755 | 756 | 757 | 758 | 759 | 760 | 761 | 762 | 763 | 764 | 765 | 766 | 767 | 768 | 769 | 770 | 771 | 772 | 773 | 774 | 775 | 776 | 777 | 778 | 779 | 780 | 781 | 782 | 783 | 784 | 785 | 786 | 787 | 788</ |
|----------------|---------|-----|-----|-----|-----|-----|-----|-----|-----|-----|-----|-----|-----|-----|-----|-----|-----|-----|-----|-----|-----|-----|-----|-----|-----|-----|-----|-----|-----|-----|-----|-----|-----|-----|-----|-----|-----|-----|-----|-------|
|----------------|---------|-----|-----|-----|-----|-----|-----|-----|-----|-----|-----|-----|-----|-----|-----|-----|-----|-----|-----|-----|-----|-----|-----|-----|-----|-----|-----|-----|-----|-----|-----|-----|-----|-----|-----|-----|-----|-----|-----|-------|

**Supplementary dataset 2 – Table 3c- Alpha-Latrotoxins- Sequences from position 951 to 1398:** Sequence alignments of the closest two alpha-latrotoxins already published and the five most abundant found in the venom of *Steatoda nobilis*. Yellow windows indicate positions where the identity and/or the physico-chemical properties of the aminoacids is maintained at least for 4 possibilities over 7, bold positions are the ones where the positions are maintained 2 or 3 times (over 7). Cysteines are highlighted in red.

| IDENTIFICATION          | SPECIES               | REF        | 951  | 952  | 953  | 954  | 955  | 956  | 957  | 958  | 959  | 960  | 961  | 962  | 963  | 964  | 965  | 966  | 967  | 968  | 969  | 970  | 971  | 972  | 973  | 974  | 975  | 976  | 977  | 978  | 979  | 980  | 981  | 982  | 983  | 984  | 985  | 986  | 987  | 988  | 989  | 990  | 991  | 992  | 993  | 994  | 995  | 996  | 997  | 998  | 999  | 1000 |   |
|-------------------------|-----------------------|------------|------|------|------|------|------|------|------|------|------|------|------|------|------|------|------|------|------|------|------|------|------|------|------|------|------|------|------|------|------|------|------|------|------|------|------|------|------|------|------|------|------|------|------|------|------|------|------|------|------|------|---|
| Alpha-Latrotoxin L7XBP2 | <i>S. grossa</i>      | /          | Q    | L    | D    | I    | V    | K    | Y    | L    | V    | E    | E    | E    | E    | L    | N    | V    | N    | V    | A    | -    | -    | -    | -    | -    | K    | P    | G    | T    | P    | L    | C    | H    | A    | A    | E    | N    | G    | Y    | L    | D    | V    | V    | K    | Y    | L    | V    | E    | N    | G    | X    |   |
| Alpha-Latrotoxin L7XCUD | <i>L. geometricus</i> | /          | H    | L    | E    | H    | V    | K    | Y    | L    | V    | E    | E    | V    | E    | L    | N    | V    | D    | G    | S    | -    | -    | -    | -    | -    | K    | P    | G    | T    | P    | L    | C    | H    | A    | A    | E    | N    | G    | H    | L    | A    | V    | V    | K    | Y    | L    | V    | E    | N    | G    | X    |   |
| Alpha-Latrotoxin-Sn1a   | <i>S. nobilis</i>     | This Study | H    | L    | E    | H    | V    | K    | Y    | L    | V    | E    | E    | V    | E    | L    | N    | V    | D    | G    | S    | -    | -    | -    | -    | -    | K    | P    | G    | T    | P    | L    | C    | H    | A    | A    | E    | N    | G    | H    | L    | A    | V    | V    | K    | Y    | L    | V    | E    | N    | G    | X    |   |
| Alpha-Latrotoxin-Sn1b   | <i>S. nobilis</i>     | This Study | E    | L    | K    | I    | V    | K    | Y    | L    | V    | E    | E    | V    | F    | L    | D    | V    | D    | T    | S    | Y    | D    | D    | D    | R    | P    | N    | D    | V    | P    | L    | C    | T    | A    | A    | F    | G    | S    | S    | L    | K    | I    | V    | K    | Y    | L    | V    | E    | N    | G    | X    |   |
| Alpha-Latrotoxin-Sn1c   | <i>S. nobilis</i>     | This Study | W    | L    | G    | I    | V    | K    | Y    | L    | V    | E    | E    | I    | H    | M    | D    | V    | N    | P    | Y    | K    | D    | W    | Y    | N    | E    | F    | N    | T    | P    | L    | C    | T    | A    | A    | K    | R    | G    | H    | L    | E    | I    | V    | H    | F    | L    | V    | Q    | E    | K    | A    |   |
| Alpha-Latrotoxin-Sn1d   | <i>S. nobilis</i>     | This Study | W    | L    | G    | I    | V    | K    | Y    | L    | V    | E    | E    | I    | H    | M    | D    | V    | N    | P    | Y    | K    | D    | W    | Y    | N    | E    | F    | N    | T    | P    | L    | C    | T    | A    | A    | K    | R    | G    | H    | L    | E    | I    | V    | H    | F    | L    | V    | Q    | E    | K    | A    |   |
| Alpha-Latrotoxin-Sn1e   | <i>S. nobilis</i>     | This Study | W    | L    | G    | I    | V    | K    | Y    | L    | V    | E    | E    | I    | H    | M    | D    | V    | N    | P    | Y    | K    | D    | W    | Y    | N    | E    | F    | N    | T    | P    | L    | C    | T    | A    | A    | K    | R    | G    | H    | L    | E    | I    | V    | H    | F    | L    | V    | Q    | E    | K    | A    |   |
| IDENTIFICATION          | SPECIES               | REF        | 1001 | 1002 | 1003 | 1004 | 1005 | 1006 | 1007 | 1008 | 1009 | 1010 | 1011 | 1012 | 1013 | 1014 | 1015 | 1016 | 1017 | 1018 | 1019 | 1020 | 1021 | 1022 | 1023 | 1024 | 1025 | 1026 | 1027 | 1028 | 1029 | 1030 | 1031 | 1032 | 1033 | 1034 | 1035 | 1036 | 1037 | 1038 | 1039 | 1040 | 1041 | 1042 | 1043 | 1044 | 1045 | 1046 | 1047 | 1048 | 1049 | 1050 |   |
| Alpha-Latrotoxin L7XBP2 | <i>S. grossa</i>      | /          | E    | I    | N    | R    | D    | C    | V    | R    | G    | -    | -    | E    | T    | A    | I    | D    | M    | A    | I    | S    | K    | N    | H    | I    | N    | V    | V    | R    | Y    | L    | V    | K    | K    | G    | A    | D    | L    | R    | R    | R    | N    | N    | A    | L    | G    | S    | T    | P    | F    | F    | T |
| Alpha-Latrotoxin L7XCUD | <i>L. geometricus</i> | /          | K    | V    | N    | H    | D    | C    | A    | N    | G    | -    | -    | E    | M    | T    | A    | I    | D    | K    | A    | I    | T    | K    | N    | Q    | L    | Q    | V    | Q    | I    | L    | A    | E    | N    | G    | V    | D    | F    | R    | R    | K    | N    | R    | L    | D    | A    | T    | P    | F    | L    | T    |   |
| Alpha-Latrotoxin-Sn1a   | <i>S. nobilis</i>     | This Study | D    | V    | N    | K    | R    | C    | M    | F    | Y    | -    | -    | Q    | S    | A    | L    | D    | M    | A    | I    | M    | K    | N    | K    | L    | E    | I    | V    | K    | Y    | L    | A    | E    | N    | G    | A    | K    | I    | R    | R    | S    | D    | I    | A    | G    | N    | S    | P    | L    | H    | N    |   |
| Alpha-Latrotoxin-Sn1b   | <i>S. nobilis</i>     | This Study | N    | I    | K    | A    | S    | R    | H    | F    | Y    | N    | A    | -    | -    | -    | -    | -    | -    | -    | A    | A    | Q    | I    | P    | R    | P    | E    | I    | L    | Q    | Y    | I    | V    | D    | Q    | G    | V    | D    | L    | K    | E    | N    | S    | S    | S    | P    | L    | I    | Q    | T    | I    |   |
| Alpha-Latrotoxin-Sn1c   | <i>S. nobilis</i>     | This Study | N    | I    | H    | T    | N    | C    | N    | F    | -    | -    | -    | -    | Q    | L    | A    | I    | D    | I    | A    | I    | F    | D    | H    | L    | N    | I    | V    | K    | F    | L    | V    | E    | N    | G    | A    | D    | L    | K    | K    | R    | N    | R    | Q    | G    | Y    | S    | P    | L    | G    | S    |   |
| Alpha-Latrotoxin-Sn1d   | <i>S. nobilis</i>     | This Study | N    | I    | H    | T    | N    | C    | N    | F    | -    | -    | -    | -    | Q    | L    | A    | I    | D    | I    | A    | I    | Q    | F    | D    | H    | L    | N    | I    | V    | K    | F    | L    | V    | E    | N    | G    | A    | D    | L    | K    | K    | R    | N    | R    | Q    | G    | Y    | S    | P    | L    | G    | S |
| Alpha-Latrotoxin-Sn1e   | <i>S. nobilis</i>     | This Study | N    | I    | H    | T    | N    | C    | N    | F    | -    | -    | -    | -    | Q    | L    | A    | I    | D    | I    | A    | I    | Q    | F    | D    | H    | L    | N    | I    | V    | K    | F    | L    | V    | E    | N    | G    | A    | D    | L    | K    | K    | R    | N    | R    | Q    | G    | Y    | S    | P    | L    | G    | S |
| IDENTIFICATION          | SPECIES               | REF        | 1051 | 1052 | 1053 | 1054 | 1055 | 1056 | 1057 | 1058 | 1059 | 1060 | 1061 | 1062 | 1063 | 1064 | 1065 | 1066 | 1067 | 1068 | 1069 | 1070 | 1071 | 1072 | 1073 | 1074 | 1075 | 1076 | 1077 | 1078 | 1079 | 1080 | 1081 | 1082 | 1083 | 1084 | 1085 | 1086 | 1087 | 1088 | 1089 | 1090 | 1091 | 1092 | 1093 | 1094 | 1095 | 1096 | 1097 | 1098 | 1099 | 1100 |   |
| Alpha-Latrotoxin L7XBP2 | <i>S. grossa</i>      | /          | A    | V    | S    | D    | N    | S    | L    | D    | I    | A    | R    | Y    | F    | I    | N    | E    | K    | I    | G    | D    | I    | D    | I    | N    | E    | Q    | N    | E    | K    | G    | E    | S    | A    | L    | H    | L    | A    | V    | Y    | Y    | R    | N    | L    | -    | -    | -    | -    | Q    | M    | I    |   |
| Alpha-Latrotoxin L7XCUD | <i>L. geometricus</i> | /          | A    | V    | A    | S    | N    | S    | Y    | E    | I    | A    | E    | Y    | L    | I    | R    | E    | K    | R    | Q    | N    | I    | N    | I    | N    | E    | Q    | N    | N    | K    | E    | T    | A    | L    | H    | L    | A    | V    | Y    | Y    | K    | N    | L    | -    | -    | -    | -    | Q    | M    | I    |      |   |
| Alpha-Latrotoxin-Sn1a   | <i>S. nobilis</i>     | This Study | A    | D    | I    | N    | E    | R    | L    | D    | I    | A    | R    | Y    | F    | I    | N    | E    | K    | I    | G    | D    | I    | D    | I    | N    | E    | Q    | N    | E    | K    | G    | E    | S    | A    | L    | H    | L    | A    | V    | Y    | Y    | K    | N    | L    | -    | -    | -    | -    | Q    | M    | I    |   |
| Alpha-Latrotoxin-Sn1b   | <i>S. nobilis</i>     | This Study | A    | M    | N    | V    | Y    | C    | F    | D    | C    | L    | K    | Y    | V    | V    | E    | N    | K    | L    | -    | -    | L    | N    | V    | N    | D    | K    | N    | Y    | N    | G    | D    | T    | I    | C    | H    | -    | I    | I    | V    | K    | N    | M    | H    | P    | L    | A    | K    | K    | I    |      |   |
| Alpha-Latrotoxin-Sn1c   | <i>S. nobilis</i>     | This Study | A    | F    | R    | Y    | Q    | K    | Y    | E    | I    | L    | K    | Y    | F    | I    | E    | E    | K    | T    | H    | L    | I    | N    | I    | N    | E    | R    | D    | F    | I    | N    | D    | T    | P    | L    | I    | T    | A    | V    | C    | V    | G    | R    | L    | -    | -    | -    | -    | D    | V    | V    |   |
| Alpha-Latrotoxin-Sn1d   | <i>S. nobilis</i>     | This Study | A    | F    | R    | Y    | Q    | K    | Y    | E    | I    | L    | K    | Y    | F    | I    | E    | E    | K    | T    | H    | L    | I    | N    | I    | N    | E    | R    | D    | F    | I    | N    | D    | T    | P    | L    | I    | T    | A    | V    | C    | V    | G    | R    | L    | -    | -    | -    | -    | D    | V    | V    |   |
| Alpha-Latrotoxin-Sn1e   | <i>S. nobilis</i>     | This Study | A    | F    | R    | Y    | Q    | K    | Y    | E    | I    | L    | K    | Y    | F    | I    | E    | E    | K    | T    | H    | L    | I    | N    | I    | N    | E    | R    | D    | F    | I    | N    | D    | T    | P    | L    | I    | T    | A    | V    | C    | V    | G    | R    | L    | -    | -    | -    | -    | D    | V    | V    |   |
| IDENTIFICATION          | SPECIES               | REF        | 1101 | 1102 | 1103 | 1104 | 1105 | 1106 | 1107 | 1108 | 1109 | 1110 | 1111 | 1112 | 1113 | 1114 | 1115 | 1116 | 1117 | 1118 | 1119 | 1120 | 1121 | 1122 | 1123 | 1124 | 1125 | 1126 | 1127 | 1128 | 1129 | 1130 | 1131 | 1132 | 1133 | 1134 | 1135 | 1136 | 1137 | 1138 | 1139 | 1140 | 1141 | 1142 | 1143 | 1144 | 1145 | 1146 | 1147 | 1148 | 1149 | 1150 |   |
| Alpha-Latrotoxin L7XBP2 | <i>S. grossa</i>      | /          | K    | L    | L    | K    | E    | N    | G    | N    | M    | G    | I    | R    | N    | A    | T    | G    | K    | T    | A    | E    | D    | I    | N    | E    | Q    | N    | E    | K    | G    | E    | S    | A    | L    | H    | L    | A    | V    | Y    | Y    | R    | N    | L    | -    | -    | -    | -    | Q    | M    | I    |      |   |
| Alpha-Latrotoxin L7XCUD | <i>L. geometricus</i> | /          | K    | L    | L    | K    | E    | N    | G    | N    | M    | G    | I    | R    | N    | A    | T    | G    | K    | T    | A    | E    | D    | I    | N    | E    | Q    | N    | E    | K    | G    | E    | S    | A    | L    | H    | L    | A    | V    | Y    | Y    | R    | N    | L    | -    | -    | -    | -    | Q    | M    | I    |      |   |
| Alpha-Latrotoxin-Sn1a   | <i>S. nobilis</i>     | This Study | K    | Y    | F    | V    | E    | K    | A    | D    | I    | F    | L    | P    | N    | R    | E    | G    | K    | T    | A    | L    | D    | V    | A    | K    | F    | Y    | S    | N    | K    | D    | I    | I    | S    | Y    | L    | E    | S    | K    | S    | K    | R    | F    | L    | R    | N    | V    | T    | P    | L    | Q    |   |
| Alpha-Latrotoxin-Sn1b   | <i>S. nobilis</i>     | This Study | S    | Y    | L    | C    | S    | Q    | E    | A    | D    | V    | T    | I    | R    | N    | N    | D    | D    | K    | T    | A    | Y    | E    | I    | A    | E    | E    | N    | G    | Q    | E    | S    | L    | Y    | P    | C    | L    | K    | P    | N    | T    | Y    | -    | -    | -    | -    | -    | -    | -    | -    | -    |   |
| Alpha-Latrotoxin-Sn1c   | <i>S. nobilis</i>     | This Study | K    | S    | L    | V    | E    | H    | G    | A    | D    | L    | T    | A    | K    | N    | N    | D    | G    | E    | T    | A    | L    | D    | A    | A    | R    | N    | L    | K    | Q    | Y    | K    | T    | I    | E    | Y    | L    | Q    | S    | R    | S    | K    | R    | F    | I    | Q    | R    | -    | -    | -    | -    |   |
| Alpha-Latrotoxin-Sn1d   | <i>S. nobilis</i>     | This Study | K    | S    | L    | V    | E    | H    | G    | A    | D    | L    | T    | A    | K    | N    | N    | D    | G    | E    | T    | A    | L    | D    | A    | A    | R    | N    | L    | K    | Q    | Y    | K    | T    | I    | E    | Y    | L    | Q    | S    | R    | S    | K    | R    | F    | I    | Q    | R    | -    | -    | -    | -    |   |
| Alpha-Latrotoxin-Sn1e   | <i>S. nobilis</i>     | This Study | K    | S    | L    | V    | E    | H    | G    | A    | D    | L    | T    | A    | K    | N    | N    | D    | G    | E    | T    | A    | L    | D    | A    | A    | R    | N    | L    | K    | Q    | Y    | K    | T    | I    | E    | Y    | L    | Q    | S    | R    | S    | K    | R    | F    | I    | Q    | R    | -    | -    | -    | -    |   |
| IDENTIFICATION          | SPECIES               | REF        | 1151 | 1152 | 1153 | 1154 | 1155 | 1156 | 1157 | 1158 | 1159 | 1160 | 1161 | 1162 | 1163 | 1164 | 1165 | 1166 | 1167 | 1168 | 1169 | 1170 | 1171 | 1172 | 1173 | 1174 | 1175 | 1176 | 1177 | 1178 | 1179 | 1180 | 1181 | 1182 | 1183 | 1184 | 1185 | 1186 | 1187 | 1188 | 1189 | 1190 | 1191 | 1192 | 1193 | 1194 | 1195 | 1196 | 1197 | 1198 | 1199 | 1200 |   |
| Alpha-Latrotoxin L7XBP2 | <i>S. grossa</i>      | /          | -    | -    | F    | Q    | I    | L    | R    | N    | A    | Q    | G    | Y    | P    | -    | -    | -    | -    | -    | -    | -    | -    | -    | -    | H    | M    | N    | M    | I    | S    | N    | F    | I    | G    | -    | S    | K    | N    | I    | E    | -    | -    | -    | -    | -    | -    | -    | -    | -    |      |      |   |
| Alpha-Latrotoxin L7XCUD | <i>L. geometricus</i> | /          | -    | -    | H    | Q    | H    | Q    | R    | F    | L    | N    | S    | D    | V    | E    | S    | K    | -    | -    | -    | -    | -    | -    | -    | H    | E    | N    | R    | I    | S    | N    | F    | I    | G    | -    | S    | K    | N    | L    | E    | -    | -    | -    | -    | -    | -    | -    | -    | -    |      |      |   |
| Alpha-Latrotoxin-Sn1a   | <i>S. nobilis</i>     | This Study | -    | -    | G    | S    | M    | D    | F    | S    | T    | N    | K    | R    | F    | L    | P    | -    | -    | -    | -    | -    | -    | -    | -    | N    | L    | Y    | K    | R    | S    | T    | H    | S    | Y    | V    | S    | K    | -    | -    | -    | -    | -    | -    | -    | -    | -    | -    | -    | -    |      |      |   |
| Alpha-Latrotoxin-Sn1b   | <i>S. nobilis</i>     | This Study | -    | -    | -    | -    | -    | -    | -    | -    | -    | -    | -    | -    | -    | -    | -    | -    | -    | -    | -    | -    | -    | -    | -    | -    | -    | -    | -    | -    | -    | -    | -    | -    | -    | -    | -    | -    | -    | -    | -    | -    | -    | -    | -    | -    | -    | -    | -    |      |      |      |   |
| Alpha-Latrotoxin-Sn1c   | <i>S. nobilis</i>     | This Study | -    | -    | -    | -    | -    | -    | -    | -    | -    | -    | -    | -    | -    | -    | -    | -    | -    | -    | -    | -    | -    | -    | -    | -    | -    | -    | -    | -    | -    | -    | -    | -    | -    | -    | -    | -    | -    | -    | -    | -    | -    | -    | -    | -    | -    | -    | -    |      |      |      |   |
| Alpha-Latrotoxin-Sn1d   | <i>S. nobilis</i>     | This Study | -    | -    | -    | -    | -    | -    | -    | -    | -    | -    | -    | -    | -    | -    | -    | -    | -    | -    | -    | -    | -    | -    | -    | -    | -    | -    | -    | -    | -    | -    | -    | -    | -    | -    | -    | -    | -    | -    | -    | -    | -    | -    | -    | -    | -    | -    | -    |      |      |      |   |
| Alpha-Latrotoxin-Sn1e   | <i>S. nobilis</i> </  |            |      |      |      |      |      |      |      |      |      |      |      |      |      |      |      |      |      |      |      |      |      |      |      |      |      |      |      |      |      |      |      |      |      |      |      |      |      |      |      |      |      |      |      |      |      |      |      |      |      |      |   |

**Supplementary dataset 2 – Table 4a- Delta-Latroinsectotoxins- Sequences from position 1 to 400:** Sequence alignments of the closest two delta-latroinsectotoxins already published and the five most abundant found in the venom of *Steatoda nobilis*. Yellow windows indicate positions where the identity and/or the physico-chemical properties of the aminoacids is maintained at least for 4 possibilities over 7, bold positions are the ones where the positions are maintained 2 or 3 times (over 7). Cysteines are highlighted in red.

| IDENTIFICATION                         | SPECIES                    | REF        | 1 | 2 | 3 | 4 | 5 | 6 | 7 | 8 | 9 | 10 | 11 | 12 | 13 | 14 | 15 | 16 | 17 | 18 | 19 | 20 | 21 | 22 | 23 | 24 | 25 | 26 | 27 | 28 | 29 | 30 | 31 | 32 | 33 | 34 | 35 | 36 | 37 | 38 | 39 | 40 | 41 | 42 | 43 | 44 | 45 | 46 | 47 | 48 | 49 | 50 |   |   |
|----------------------------------------|----------------------------|------------|---|---|---|---|---|---|---|---|---|----|----|----|----|----|----|----|----|----|----|----|----|----|----|----|----|----|----|----|----|----|----|----|----|----|----|----|----|----|----|----|----|----|----|----|----|----|----|----|----|----|---|---|
| Delta-latroinsectotoxin-Lt1a Q25338    | <i>L. redeicimguttatus</i> | [1]        | D | E | E | D | G | E | M | T | L | A  | E  | R  | K  | Q  | A  | Q  | K  | A  | T  | E  | Y  | S  | N  | I  | S  | F  | G  | M  | T  | A  | D  | V  | A  | N  | D  | I  | G  | S  | P  | V  | I  | G  | E  | V  | V  | A  | G  | V  | V  | T  |   |   |
| Delta-latroinsectotoxin-XP_015914373.1 | <i>P. tepidariorum</i>     | /          | D | E | E | - | - | L | N | E | I | A  | E  | R  | K  | Q  | Q  | C  | Q  | I  | L  | E  | Y  | A  | S  | I  | A  | T  | E  | L  | V  | G  | N  | L  | A  | S  | D  | V  | S  | D  | I  | P  | V  | V  | G  | E  | V  | V  | A  | G  | V  | V  | T |   |
| Delta-latroinsectotoxin-Sno1a          | <i>S. nobilis</i>          | This study | F | L | R | G | G | N | M | T | L | E  | R  | A  | E  | K  | C  | Q  | T  | I  | E  | Y  | R  | N  | K  | I  | T  | G  | F  | M  | D  | N  | M  | A  | S  | D  | V  | G  | D  | I  | P  | V  | F  | G  | E  | V  | V  | A  | K  | A  | F  | T  |   |   |
| Delta-latroinsectotoxin-Sno1b          | <i>S. nobilis</i>          | This study | E | - | E | E | E | M | S | L | E | E  | R  | Q  | A  | Q  | C  | K  | A  | I  | E  | Y  | S  | G  | H  | V  | A  | G  | M  | V  | A  | D  | V  | A  | G  | D  | I  | G  | S  | I  | P  | V  | I  | G  | D  | V  | V  | G  | V  | F  | T  |    |   |   |
| Delta-latroinsectotoxin-Sno1c          | <i>S. nobilis</i>          | This study | E | - | E | E | E | M | S | L | E | E  | R  | Q  | A  | Q  | C  | K  | A  | I  | E  | Y  | S  | G  | H  | V  | A  | G  | M  | V  | A  | D  | V  | A  | G  | D  | I  | G  | S  | I  | P  | V  | I  | G  | D  | V  | V  | G  | V  | F  | T  |    |   |   |
| Delta-latroinsectotoxin-Sno1d          | <i>S. nobilis</i>          | This study | - | - | - | - | - | - | - | - | - | -  | -  | -  | -  | -  | -  | -  | -  | M  | K  | I  | A  | N  | T  | A  | V  | G  | T  | Y  | G  | D  | N  | F  | S  | L  | L  | T  | S  | I  | P  | V  | I  | G  | -  | -  | -  | M  | F  | F  |    |    |   |   |
| Delta-latroinsectotoxin-Sno1e          | <i>S. nobilis</i>          | This study | - | - | R | K | T | K | T | A | W | E  | K  | K  | Q  | A  | Q  | G  | K  | A  | L  | E  | Q  | G  | S  | N  | V  | S  | D  | A  | V  | G  | N  | V  | A  | K  | G  | I  | G  | S  | I  | P  | V  | I  | G  | E  | A  | V  | S  | F  | I  | T  |   |   |
| Delta-latroinsectotoxin-Lt1a Q25338    | <i>L. redeicimguttatus</i> | [1]        | A | P | I | A | I | V | S | H | I | T  | S  | A  | G  | L  | D  | I  | A  | S  | T  | A  | L  | D  | C  | D  | D  | D  | I  | P  | F  | D  | E  | I  | K  | E  | I  | L  | E  | R  | F  | N  | E  | I  | D  | R  | K  | L  | D  | K  | S  | M  |   |   |
| Delta-latroinsectotoxin-XP_015914373.1 | <i>P. tepidariorum</i>     | /          | A | G | I | S | M | V | S | H | V | A  | K  | A  | G  | M  | D  | I  | A  | S  | S  | Q  | A  | L  | D  | C  | D  | D  | V  | N  | F  | D  | E  | I  | K  | E  | I  | M  | D  | E  | R  | F  | N  | E  | V  | N  | R  | K  | L  | D  | K  | Q  | M |   |
| Delta-latroinsectotoxin-Sno1a          | <i>S. nobilis</i>          | This study | V | P | A | K | M | A | F | H | V | D  | Q  | F  | K  | Q  | D  | M  | K  | S  | M  | A  | L  | R  | C  | D  | D  | D  | V  | P  | F  | D  | E  | L  | K  | E  | I  | L  | E  | R  | K  | F  | N  | E  | V  | D  | R  | K  | L  | D  | K  | N  | T |   |
| Delta-latroinsectotoxin-Sno1b          | <i>S. nobilis</i>          | This study | A | I | A | - | - | A | K | I | T | S  | A  | S  | L  | D  | I  | A  | S  | T  | A  | L  | D  | C  | D  | D  | I  | P  | F  | D  | E  | I  | K  | Q  | I  | L  | E  | R  | F  | N  | E  | V  | N  | R  | K  | L  | D  | E  | Q  | T  |    |    |   |   |
| Delta-latroinsectotoxin-Sno1c          | <i>S. nobilis</i>          | This study | A | P | I | A | I | V | A | H | I | T  | S  | A  | G  | L  | D  | I  | A  | S  | T  | A  | L  | D  | C  | D  | D  | I  | P  | F  | D  | E  | I  | K  | Q  | I  | L  | E  | R  | F  | N  | E  | V  | N  | R  | K  | L  | D  | E  | Q  | T  |    |   |   |
| Delta-latroinsectotoxin-Sno1d          | <i>S. nobilis</i>          | This study | V | P | V | S | M | A | F | N | V | V  | K  | G  | A  | L  | N  | I  | A  | T  | Q  | T  | A  | L  | D  | C  | D  | D  | V  | P  | F  | D  | E  | I  | K  | L  | M  | L  | E  | R  | K  | F  | H  | E  | V  | F  | S  | L  | L  | T  | S  | I  | P |   |
| Delta-latroinsectotoxin-Sno1e          | <i>S. nobilis</i>          | This study | A | P | L | S | V | L | A | V | V | T  | S  | A  | G  | L  | N  | I  | A  | S  | S  | A  | L  | D  | C  | D  | K  | L  | P  | F  | D  | E  | I  | K  | N  | L  | L  | N  | E  | R  | F  | N  | E  | V  | D  | R  | K  | L  | D  | Q  | Q  | A  |   |   |
| Delta-latroinsectotoxin-Lt1a Q25338    | <i>L. redeicimguttatus</i> | [1]        | E | A | L | E | E | V | S | R | L | V  | S  | K  | T  | M  | L  | I  | V  | D  | Q  | T  | R  | V  | M  | M  | R  | E  | G  | F  | D  | K  | I  | L  | L  | D  | A  | I  | E  | N  | K  | E  | L  | K  | D  | S  | I  | N  | K  | I  | K  | N  | F |   |
| Delta-latroinsectotoxin-XP_015914373.1 | <i>P. tepidariorum</i>     | /          | E | M | L | Q | E | V | S | K | L | V  | S  | K  | T  | Y  | E  | V  | V  | E  | R  | L  | R  | S  | E  | M  | K  | R  | E  | G  | F  | Q  | D  | I  | L  | E  | T  | I  | D  | I  | K  | E  | I  | R  | A  | I  | V  | F  | R  | K  | I  | D  | N | F |
| Delta-latroinsectotoxin-Sno1a          | <i>S. nobilis</i>          | This study | N | A | L | E | E | V | S | K | L | V  | S  | K  | T  | Y  | T  | V  | V  | E  | K  | T  | R  | T  | E  | M  | N  | E  | N  | F  | K  | L  | V  | L  | E  | T  | I  | E  | S  | K  | E  | I  | K  | S  | I  | V  | F  | K  | I  | D  | D  | F  |   |   |
| Delta-latroinsectotoxin-Sno1b          | <i>S. nobilis</i>          | This study | A | L | L | K | R | V | H | N | L | V  | G  | R  | N  | F  | E  | A  | I  | E  | R  | S  | R  | L  | E  | M  | K  | E  | G  | F  | Q  | N  | I  | L  | E  | T  | I  | H  | N  | D  | L  | S  | K  | I  | V  | F  | N  | I  | N  | N  | F  |    |   |   |
| Delta-latroinsectotoxin-Sno1c          | <i>S. nobilis</i>          | This study | V | I | G | - | - | - | M | F | F | V  | P  | V  | S  | M  | A  | E  | F  | N  | V  | V  | K  | G  | A  | L  | D  | I  | T  | Q  | T  | A  | M  | D  | C  | D  | D  | I  | V  | P  | F  | E  | E  | I  | K  | L  | M  | L  | E  | E  | K  | F  | H |   |
| Delta-latroinsectotoxin-Sno1d          | <i>S. nobilis</i>          | This study | A | A | L | D | K | V | S | K | I | A  | S  | K  | T  | F  | A  | E  | V  | E  | N  | T  | R  | S  | E  | M  | N  | E  | G  | F  | K  | L  | V  | L  | D  | C  | D  | I  | Q  | S  | Q  | S  | I  | K  | S  | I  | L  | V  | F  | S  | I  | N  | F |   |
| Delta-latroinsectotoxin-Lt1a Q25338    | <i>L. redeicimguttatus</i> | [1]        | V | K | F | F | E | K | E | R | Q | R  | I  | K  | G  | L  | P  | K  | D  | R  | Y  | A  | K  | L  | Q  | E  | P  | N  | S  | V  | L  | T  | Y  | L  | R  | N  | T  | R  | L  | E  | P  | S  | G  | N  | S  | L  | S  | A  | L  | H  | K  |    |   |   |
| Delta-latroinsectotoxin-XP_015914373.1 | <i>P. tepidariorum</i>     | /          | K | G | Y | F | E | M | E | K | R | A  | M  | R  | S  | L  | P  | E  | D  | Q  | Y  | I  | F  | K  | L  | Q  | E  | P  | N  | S  | V  | L  | T  | Y  | L  | R  | N  | T  | R  | L  | E  | P  | S  | G  | N  | S  | L  | S  | A  | L  | H  | K  |   |   |
| Delta-latroinsectotoxin-Sno1a          | <i>S. nobilis</i>          | This study | K | G | Y | F | E | M | E | K | R | A  | M  | R  | S  | L  | P  | E  | D  | Q  | Y  | I  | F  | K  | L  | Q  | E  | P  | N  | S  | V  | L  | T  | Y  | L  | R  | N  | T  | R  | L  | E  | P  | S  | G  | N  | S  | L  | S  | A  | L  | H  | K  |   |   |
| Delta-latroinsectotoxin-Sno1b          | <i>S. nobilis</i>          | This study | K | G | F | F | D | K | E | R | Q | R  | I  | K  | G  | L  | P  | K  | D  | K  | Y  | V  | A  | K  | L  | L  | E  | Q  | K  | G  | I  | L  | S  | S  | L  | K  | E  | V  | R  | E  | P  | S  | G  | N  | S  | L  | S  | A  | L  | H  | K  |    |   |   |
| Delta-latroinsectotoxin-Sno1c          | <i>S. nobilis</i>          | This study | V | T | F | F | D | K | E | R | Q | R  | I  | K  | G  | L  | P  | K  | D  | K  | Y  | V  | A  | K  | L  | L  | E  | Q  | K  | G  | I  | L  | S  | S  | L  | K  | E  | V  | R  | E  | P  | S  | G  | N  | S  | L  | S  | A  | L  | H  | K  |    |   |   |
| Delta-latroinsectotoxin-Sno1d          | <i>S. nobilis</i>          | This study | E | V | Y | F | D | N | E | R | A | S  | M  | R  | G  | D  | S  | K  | E  | R  | Y  | I  | A  | K  | L  | Q  | D  | P  | D  | S  | I  | L  | V  | Y  | L  | S  | M  | R  | T  | S  | S  | E  | D  | S  | L  | D  | Y  | A  | L  | F  | E  |    |   |   |
| Delta-latroinsectotoxin-Sno1e          | <i>S. nobilis</i>          | This study | I | R | Y | F | D | E | E | R | E | K  | L  | K  | G  | L  | S  | K  | D  | N  | Y  | I  | A  | K  | L  | Q  | E  | Q  | D  | S  | I  | L  | F  | Y  | L  | K  | D  | S  | R  | T  | P  | K  | G  | D  | S  | L  | S  | S  | A  | L  | Y  | K  |   |   |
| Delta-latroinsectotoxin-Lt1a Q25338    | <i>L. redeicimguttatus</i> | [1]        | L | L | D | K | N | N | N | V | A | I  | P  | K  | V  | V  | D  | D  | N  | K  | A  | Y  | Q  | A  | L  | Y  | A  | L  | F  | Y  | G  | T  | Q  | T  | Y  | A  | A  | V  | M  | F  | F  | L  | L  | E  | Q  | H  | S  | Y  | L  | A  | D  | Y  |   |   |
| Delta-latroinsectotoxin-XP_015914373.1 | <i>P. tepidariorum</i>     | /          | I | I | D | S | - | - | D | Y | A | I  | P  | K  | N  | A  | E  | N  | D  | S  | K  | A  | F  | S  | A  | L  | H  | A  | L  | F  | H  | G  | A  | Q  | T  | Y  | V  | S  | I  | M  | F  | F  | L  | L  | K  | E  | H  | S  | Y  | L  | A  | D  | Y |   |
| Delta-latroinsectotoxin-Sno1a          | <i>S. nobilis</i>          | This study | L | I | D | P | E | N | H | Y | A | V  | P  | K  | A  | E  | N  | D  | R  | K  | A  | F  | S  | A  | L  | H  | A  | L  | F  | Y  | G  | T  | Q  | T  | Y  | V  | S  | I  | M  | F  | F  | L  | L  | E  | Q  | H  | S  | F  | L  | A  | D  | Y  |   |   |
| Delta-latroinsectotoxin-Sno1b          | <i>S. nobilis</i>          | This study | L | L | D | K | N | N | N | Y | A | I  | P  | K  | V  | A  | D  | D  | N  | K  | A  | F  | Q  | A  | L  | Y  | A  | L  | F  | Y  | G  | T  | Q  | T  | Y  | A  | A  | S  | V  | M  | Y  | F  | L  | L  | E  | Q  | H  | S  | Y  | L  | A  | D  | Y |   |
| Delta-latroinsectotoxin-Sno1c          | <i>S. nobilis</i>          | This study | L | L | D | K | N | N | N | Y | A | I  | P  | K  | V  | A  | D  | D  | N  | K  | A  | F  | Q  | A  | L  | Y  | A  | L  | F  | Y  | G  | T  | Q  | T  | Y  | A  | A  | S  | V  | M  | Y  | F  | L  | L  | E  | Q  | H  | S  | Y  | L  | A  | D  | Y |   |
| Delta-latroinsectotoxin-Sno1d          | <i>S. nobilis</i>          | This study | L | M | E | E | D | K | M | Y | V | I  | P  | K  | S  | I  | D  | D  | E  | N  | A  | F  | K  | A  | L  | Y  | N  | A  | L  | F  | Y  | G  | T  | Q  | S  | Y  | V  | S  | I  | M  | F  | F  | L  | L  | G  | E  | F  | S  | Y  | L  | A  | D  | Y |   |
| Delta-latroinsectotoxin-Sno1e          | <i>S. nobilis</i>          | This study | L | I | D | K | N | N | N | Y | A | I  | P  | K  | V  | F  | D  | D  | N  | K  | A  | Y  | Q  | A  | L  | Y  | N  | A  | L  | F  | Y  | G  | T  | Q  | A  | Y  | V  | S  | I  | M  | F  | F  | L  | L  | G  | E  | F  | S  | Y  | L  | A  | D  | Y |   |
| Delta-latroinsectotoxin-Lt1a Q25338    | <i>L. redeicimguttatus</i> | [1]        | Y | Y | Q | K | G | D | M | V | N | F  | N  | A  | E  | F  | D  | N  | V  | A  | I  | I  | F  | D  | D  | F  | K  | S  | S  | L  | T  | G  | G  | -  | -  | -  | -  | D  | D  | G  | L  | I  | D  | N  | V  | I  | E  | V  | L  | N  | -  | T  |   |   |
| Delta-latroinsectotoxin-XP_015914373.1 | <i>P. tepidariorum</i>     | /          | N | Y | Q | K | G | D | M | V | N | F  | N  | A  | E  | F  | D  | N  | V  | A  | I  | I  | F  | D  | D  | F  | K  | S  | S  | L  | T  | G  | G  | -  | -  | -  | -  | D  | D  | G  | L  | I  | D  | N  | V  | I  | E  | V  | L  | N  | -  | T  |   |   |
| Delta-latroinsectotoxin-Sno1a          | <i>S. nobilis</i>          | This study | Y | Y | E | Q | G | E | T | A | K | F  | N  | N  | Q  | F  | E  | K  | I  | L  | T  | L  | F  | K  | G  | F  | K  | T  | S  | L  | T  | G  | G  | S  | I  | K  | N  | -  | P  | K  | P  | L  | L  | D  | K  | V  | I  | K  | I  | F  | K  | T  | D |   |
| Delta-latroinsectotoxin-Sno1b          | <i>S. nobilis</i>          | This study | Y | Y | Q | K | G | D | D | E | A | F  | N  | R  | E  | F  | S  | L  | V  | S  | T  | I  | F  | D  | D  | F  | K  | S  | S  | L  | T  | G  | G  | -  | -  | -  | -  | D  | D  | G  | L  | V  | D  | N  | V  | A  | V  | L  | K  | -  | T  |    |   |   |
| Delta-latroinsectotoxin-Sno1c          | <i>S. nobilis</i>          | This study | Y | Y | Q | K | G | D | D | E | A | F  | N  | R  | E  | F  | S  | L  | V  | S  | T  | I  | F  | D  | D  | F  | K  | S  | S  | L  | T  | G  | G  | -  | -  | -  | -  | D  | D  | G  | L  | V  | D  | N  | V  | A  | V  | L  | K  | -  | T  |    |   |   |
| Delta-latroinsectotoxin-Sno1d          | <i>S. nobilis</i>          | This study | H | Y | R | E | G | N | Y | E | E | F  | N  | K  | N  | F  | N  | V  | V  | E  | T  | F  | E  | E  | F  | K  | S  | S  | L  | I  | G  | K  | D  | Q  | G  | Q  | G  | V  | R  | G  | N  | V  | I  | D  | N  | V  | I  | E  | R  | L  | N  | -  | R |   |
| Delta-latroinsectotoxin-Sno1e          | <i>S. nobilis</i>          | This       |   |   |   |   |   |   |   |   |   |    |    |    |    |    |    |    |    |    |    |    |    |    |    |    |    |    |    |    |    |    |    |    |    |    |    |    |    |    |    |    |    |    |    |    |    |    |    |    |    |    |   |   |



**Supplementary dataset 2 – Table 4b- Delta-Latroinsectotoxins- Sequences from position 401 to 800:** Sequence alignments of the closest two delta-latroinsectotoxins already published and the five most abundant found in the venom of *Steatoda nobilis*. Yellow windows indicate positions where the identity and/or the physico-chemical properties of the aminoacids is maintained at least for 4 possibilities over 7, bold positions are the ones where the positions are maintained 2 or 3 times (over 7). Cysteines are highlighted in red.

| IDENTIFICATION                         | SPECIES                  | REF        | 401 | 402 | 403 | 404 | 405 | 406 | 407 | 408 | 409 | 410 | 411 | 412 | 413 | 414 | 415 | 416 | 417 | 418 | 419 | 420 | 421 | 422 | 423 | 424 | 425 | 426 | 427 | 428 | 429 | 430 | 431 | 432 | 433 | 434 | 435 | 436 | 437 | 438 | 439 | 440 | 441 | 442 | 443 | 444 | 445 | 446 | 447 | 448 | 449 | 450 |
|----------------------------------------|--------------------------|------------|-----|-----|-----|-----|-----|-----|-----|-----|-----|-----|-----|-----|-----|-----|-----|-----|-----|-----|-----|-----|-----|-----|-----|-----|-----|-----|-----|-----|-----|-----|-----|-----|-----|-----|-----|-----|-----|-----|-----|-----|-----|-----|-----|-----|-----|-----|-----|-----|-----|-----|
| Delta-latroinsectotoxin-L1a Q25338     | <i>L. redecingutatus</i> | [1]        | C   | P   | T   | K   | F   | R   | V   | D   | P   | K   | -   | K   | R   | N   | R   | L   | V   | F   | R   | K   | F   | N   | D   | N   | K   | P   | Q   | L   | V   | G   | V   | L   | S   | K   | L   | Q   | I   | L   | F   | K   | D   | T   | H   | R   | D   | L   | Y   | D   | A   |     |
| Delta-latroinsectotoxin-XP_015914373.1 | <i>P. tepidariorum</i>   | /          | N   | P   | T   | L   | K   | F   | I   | D   | L   | K   | -   | R   | R   | K   | R   | L   | V   | F   | R   | K   | F   | N   | D   | N   | K   | P   | Q   | L   | V   | G   | V   | L   | S   | K   | L   | Q   | I   | L   | F   | K   | D   | T   | H   | R   | D   | L   | Y   | D   | A   |     |
| Delta-latroinsectotoxin-Sno1a          | <i>S. nobilis</i>        | This study | N   | P   | I   | L   | K   | V   | A   | I   | D   | Q   | E   | N   | N   | R   | Y   | R   | L   | I   | F   | R   | K   | F   | K   | D   | H   | E   | A   | Q   | Y   | I   | G   | M   | L   | S   | E   | T   | Q   | T   | D   | F   | W   | D   | I   | N   | R   | D   | L   | Y   | D   | A   |
| Delta-latroinsectotoxin-Sno1b          | <i>S. nobilis</i>        | This study | S   | P   | V   | L   | K   | V   | P   | V   | D   | K   | K   | -   | R   | R   | N   | R   | L   | I   | F   | R   | K   | V   | N   | S   | E   | K   | Y   | Q   | F   | A   | G   | V   | M   | S   | H   | T   | Q   | T   | N   | F   | R   | D   | I   | D   | R   | D   | L   | Y   | N   | A   |
| Delta-latroinsectotoxin-Sno1c          | <i>S. nobilis</i>        | This study | S   | P   | V   | L   | K   | V   | P   | V   | D   | K   | K   | -   | R   | R   | N   | R   | L   | I   | F   | R   | K   | V   | N   | S   | E   | K   | Y   | Q   | F   | A   | G   | V   | M   | S   | H   | T   | Q   | T   | N   | F   | R   | D   | I   | D   | R   | D   | L   | Y   | N   | A   |
| Delta-latroinsectotoxin-Sno1d          | <i>S. nobilis</i>        | This study | N   | P   | K   | L   | T   | I   | P   | V   | D   | P   | N   | -   | N   | R   | N   | R   | L   | I   | F   | R   | R   | F   | N   | N   | H   | K   | P   | Q   | L   | V   | G   | V   | L   | R   | A   | Y   | Q   | H   | T   | F   | K   | D   | I   | N   | R   | D   | L   | Y   | N   | A   |
| Delta-latroinsectotoxin-Sno1e          | <i>S. nobilis</i>        | This study | N   | P   | T   | I   | K   | V   | P   | V   | D   | Q   | K   | -   | R   | R   | N   | R   | L   | I   | F   | R   | K   | F   | N   | K   | G   | K   | P   | Q   | L   | V   | H   | I   | M   | K   | K   | T   | E   | T   | S   | F   | R   | D   | I   | N   | R   | D   | L   | Y   | N   | A   |

| IDENTIFICATION                         | SPECIES                  | REF        | 451 | 452 | 453 | 454 | 455 | 456 | 457 | 458 | 459 | 460 | 461 | 462 | 463 | 464 | 465 | 466 | 467 | 468 | 469 | 470 | 471 | 472 | 473 | 474 | 475 | 476 | 477 | 478 | 479 | 480 | 481 | 482 | 483 | 484 | 485 | 486 | 487 | 488 | 489 | 490 | 491 | 492 | 493 | 494 | 495 | 496 | 497 | 498 | 499 | 500 |   |   |
|----------------------------------------|--------------------------|------------|-----|-----|-----|-----|-----|-----|-----|-----|-----|-----|-----|-----|-----|-----|-----|-----|-----|-----|-----|-----|-----|-----|-----|-----|-----|-----|-----|-----|-----|-----|-----|-----|-----|-----|-----|-----|-----|-----|-----|-----|-----|-----|-----|-----|-----|-----|-----|-----|-----|-----|---|---|
| Delta-latroinsectotoxin-L1a Q25338     | <i>L. redecingutatus</i> | [1]        | A   | L   | N   | -   | N   | K   | L   | K   | A   | V   | D   | E   | A   | T   | T   | L   | -   | I   | E   | K   | G   | A   | D   | I   | E   | A   | K   | F   | D   | S   | D   | R   | S   | V   | M   | H   | A   | A   | V   | A   | Y   | R   | G   | N   | N   | K   | I   | A   | L   | R   | F |   |
| Delta-latroinsectotoxin-XP_015914373.1 | <i>P. tepidariorum</i>   | /          | A   | G   | R   | V   | D   | K   | K   | L   | A   | L   | K   | E   | I   | N   | L   | L   | -   | I   | E   | N   | G   | A   | D   | I   | N   | A   | V   | F   | D   | S   | D   | R   | S   | V   | M   | H   | A   | A   | A   | K   | S   | G   | N   | D   | K   | A   | A   | L   | R   | I   |   |   |
| Delta-latroinsectotoxin-Sno1a          | <i>S. nobilis</i>        | This study | A   | M   | G   | V   | D   | K   | K   | L   | S   | I   | S   | D   | V   | Q   | R   | L   | -   | I   | E   | L   | G   | A   | N   | I   | N   | T   | S   | A   | F   | F   | E   | L   | G   | R   | T   | A   | M   | H   | G   | A   | A   | L   | R   | G   | N   | K   | E   | V   | A   | L   | H | F |
| Delta-latroinsectotoxin-Sno1b          | <i>S. nobilis</i>        | This study | A   | L   | N   | I   | N   | K   | N   | K   | A   | V   | N   | E   | V   | A   | T   | L   | -   | L   | G   | K   | G   | A   | N   | I   | N   | S   | K   | F   | D   | N   | A   | R   | S   | A   | M   | H   | A   | V   | A   | L   | R   | G   | N   | G   | K   | V   | A   | L   | R   | F   |   |   |
| Delta-latroinsectotoxin-Sno1c          | <i>S. nobilis</i>        | This study | A   | L   | N   | I   | N   | K   | N   | K   | A   | V   | N   | E   | V   | A   | T   | L   | -   | L   | G   | K   | G   | A   | N   | I   | N   | S   | K   | F   | D   | N   | A   | R   | S   | A   | M   | H   | A   | V   | A   | L   | R   | G   | N   | G   | K   | V   | A   | L   | R   | F   |   |   |
| Delta-latroinsectotoxin-Sno1d          | <i>S. nobilis</i>        | This study | A   | M   | D   | V   | N   | K   | N   | L   | G   | Y   | K   | D   | F   | M   | K   | L   | -   | L   | Q   | S   | N   | E   | I   | N   | M   | N   | A   | K   | F   | D   | L   | G   | W   | T   | V   | L   | H   | A   | A   | Y   | I   | G   | N   | F   | E   | I   | V   | K   | H   | V   |   |   |
| Delta-latroinsectotoxin-Sno1e          | <i>S. nobilis</i>        | This study | A   | L   | S   | V   | D   | K   | D   | I   | A   | M   | D   | E   | V   | K   | N   | L   | -   | I   | D   | I   | G   | A   | D   | I   | S   | S   | V   | F   | D   | Q   | G   | R   | S   | A   | A   | L   | H   | A   | V   | A   | L   | R   | G   | N   | E   | K   | V   | A   | M   | R   | F |   |

| IDENTIFICATION                         | SPECIES                  | REF        | 501 | 502 | 503 | 504 | 505 | 506 | 507 | 508 | 509 | 510 | 511 | 512 | 513 | 514 | 515 | 516 | 517 | 518 | 519 | 520 | 521 | 522 | 523 | 524 | 525 | 526 | 527 | 528 | 529 | 530 | 531 | 532 | 533 | 534 | 535 | 536 | 537 | 538 | 539 | 540 | 541 | 542 | 543 | 544 | 545 | 546 | 547 | 548 | 549 | 550 |   |
|----------------------------------------|--------------------------|------------|-----|-----|-----|-----|-----|-----|-----|-----|-----|-----|-----|-----|-----|-----|-----|-----|-----|-----|-----|-----|-----|-----|-----|-----|-----|-----|-----|-----|-----|-----|-----|-----|-----|-----|-----|-----|-----|-----|-----|-----|-----|-----|-----|-----|-----|-----|-----|-----|-----|-----|---|
| Delta-latroinsectotoxin-L1a Q25338     | <i>L. redecingutatus</i> | [1]        | L   | L   | K   | N   | Q   | S   | I   | D   | I   | E   | L   | K   | D   | K   | N   | G   | F   | T   | P   | L   | H   | I   | A   | A   | E   | A   | G   | Q   | A   | G   | F   | V   | K   | L   | L   | I   | N   | H   | G   | A   | D   | V   | N   | A   | K   | T   | S   | K   | T   | N   |   |
| Delta-latroinsectotoxin-XP_015914373.1 | <i>P. tepidariorum</i>   | /          | L   | S   | N   | N   | S   | S   | I   | N   | L   | N   | V   | K   | D   | K   | K   | G   | F   | T   | P   | M   | H   | L   | A   | A   | D   | A   | G   | Q   | A   | E   | F   | I   | K   | M   | L   | I   | Q   | H   | G   | G   | D   | J   | N   | A   | K   | T   | K   | T   | D   | H   |   |
| Delta-latroinsectotoxin-Sno1a          | <i>S. nobilis</i>        | This study | L   | L   | K   | N   | D   | K   | A   | N   | L   | N   | V   | E   | K   | N   | E   | K   | G   | Y   | T   | P   | L   | H   | I   | A   | A   | E   | A   | G   | Q   | S   | G   | F   | V   | K   | L   | L   | I   | N   | H   | G   | A   | D   | V   | N   | A   | K   | A   | V   | K   | K   | N |
| Delta-latroinsectotoxin-Sno1b          | <i>S. nobilis</i>        | This study | L   | L   | N   | D   | E   | D   | T   | D   | I   | E   | L   | R   | D   | K   | N   | G   | Y   | T   | P   | L   | H   | I   | A   | A   | E   | A   | G   | Q   | S   | G   | F   | V   | K   | L   | L   | I   | N   | H   | G   | A   | D   | V   | N   | A   | K   | A   | V   | K   | K   | N   |   |
| Delta-latroinsectotoxin-Sno1c          | <i>S. nobilis</i>        | This study | L   | L   | N   | D   | E   | D   | T   | D   | I   | E   | L   | R   | D   | K   | N   | G   | Y   | T   | P   | L   | H   | I   | A   | A   | E   | A   | G   | Q   | S   | G   | F   | V   | K   | L   | L   | I   | N   | H   | G   | A   | D   | V   | N   | A   | K   | A   | V   | K   | K   | N   |   |
| Delta-latroinsectotoxin-Sno1d          | <i>S. nobilis</i>        | This study | L   | L   | N   | D   | S   | T   | F   | D   | I   | N   | E   | A   | D   | T   | E   | G   | F   | T   | P   | L   | H   | I   | A   | C   | K   | H   | S   | R   | E   | D   | F   | V   | V   | E   | F   | L   | V   | E   | H   | G   | A   | D   | V   | T   | A   | K   | T   | K   | T   | G   | L |
| Delta-latroinsectotoxin-Sno1e          | <i>S. nobilis</i>        | This study | L   | L   | K   | N   | N   | S   | T   | D   | I   | N   | I   | R   | D   | K   | R   | G   | Y   | T   | P   | L   | H   | V   | A   | A   | E   | A   | G   | Q   | S   | G   | F   | V   | N   | L   | L   | L   | S   | H   | E   | A   | D   | V   | N   | A   | K   | T   | E   | K   | Y   | S   |   |

| IDENTIFICATION                         | SPECIES                  | REF        | 551 | 552 | 553 | 554 | 555 | 556 | 557 | 558 | 559 | 560 | 561 | 562 | 563 | 564 | 565 | 566 | 567 | 568 | 569 | 570 | 571 | 572 | 573 | 574 | 575 | 576 | 577 | 578 | 579 | 580 | 581 | 582 | 583 | 584 | 585 | 586 | 587 | 588 | 589 | 590 | 591 | 592 | 593 | 594 | 595 | 596 | 597 | 598 | 599 | 600 |   |   |   |
|----------------------------------------|--------------------------|------------|-----|-----|-----|-----|-----|-----|-----|-----|-----|-----|-----|-----|-----|-----|-----|-----|-----|-----|-----|-----|-----|-----|-----|-----|-----|-----|-----|-----|-----|-----|-----|-----|-----|-----|-----|-----|-----|-----|-----|-----|-----|-----|-----|-----|-----|-----|-----|-----|-----|-----|---|---|---|
| Delta-latroinsectotoxin-L1a Q25338     | <i>L. redecingutatus</i> | [1]        | L   | T   | P   | L   | H   | L   | A   | T   | R   | S   | G   | F   | D   | K   | T   | V   | L   | I   | L   | M   | A   | N   | E   | N   | L   | Q   | I   | N   | A   | K   | D   | K   | S   | G   | F   | T   | P   | L   | H   | T   | A   | V   | M   | S   | T   | Y   | M   | V   | V   | D   |   |   |   |
| Delta-latroinsectotoxin-XP_015914373.1 | <i>P. tepidariorum</i>   | /          | L   | S   | P   | L   | H   | L   | S   | T   | R   | Y   | G   | F   | L   | E   | T   | V   | W   | R   | L   | L   | N   | S   | T   | D   | I   | K   | V   | N   | Q   | K   | A   | D   | E   | F   | I   | G   | L   | L   | I   | T   | Q   | S   | A   | N   | V   | N   | A   | K   | T   | Y   | V | H | R |
| Delta-latroinsectotoxin-Sno1a          | <i>S. nobilis</i>        | This study | L   | T   | A   | L   | H   | L   | S   | S   | S   | G   | F   | S   | K   | T   | V   | K   | T   | L   | L   | K   | S   | P   | N   | I   | N   | V   | N   | Q   | K   | A   | D   | E   | G   | F   | T   | P   | L   | H   | T   | A   | V   | M   | G   | G   | Y   | Q   | V   | V   | D   |     |   |   |   |
| Delta-latroinsectotoxin-Sno1b          | <i>S. nobilis</i>        | This study | L   | T   | A   | L   | H   | L   | S   | S   | S   | G   | F   | S   | K   | T   | V   | K   | T   | L   | L   | K   | S   | P   | N   | I   | N   | V   | N   | Q   | K   | A   | D   | E   | G   | F   | T   | P   | L   | H   | T   | A   | V   | M   | G   | G   | Y   | Q   | V   | V   | D   |     |   |   |   |
| Delta-latroinsectotoxin-Sno1c          | <i>S. nobilis</i>        | This study | M   | S   | A   | L   | H   | T   | S   | A   | E   | Y   | G   | F   | A   | N   | V   | V   | K   | N   | L   | L   | K   | S   | T   | A   | I   | S   | V   | N   | Q   | A   | Y   | F   | A   | Y   | T   | S   | L   | H   | A   | A   | V   | G   | Q   | I   | Q   | V   | V   | R   |     |     |   |   |   |
| Delta-latroinsectotoxin-Sno1d          | <i>S. nobilis</i>        | This study | L   | T   | A   | L   | H   | L   | A   | A   | R   | N   | G   | F   | P   | K   | T   | V   | E   | N   | L   | L   | K   | S   | P   | N   | I   | I   | I   | N   | E   | K   | S   | D   | S   | G   | Y   | T   | A   | L   | H   | A   | A   | I   | D   | G   | G   | F   | R   | V   | L   | E   |   |   |   |

| IDENTIFICATION                         | SPECIES                  | REF        | 601 | 602 | 603 | 604 | 605 | 606 | 607 | 608 | 609 | 610 | 611 | 612 | 613 | 614 | 615 | 616 | 617 | 618 | 619 | 620 | 621 | 622 | 623 | 624 | 625 | 626 | 627 | 628 | 629 | 630 | 631 | 632 | 633 | 634 | 635 | 636 | 637 | 638 | 639 | 640 | 641 | 642 | 643 | 644 | 645 | 646 | 647 | 648 | 649 | 650 |   |
|----------------------------------------|--------------------------|------------|-----|-----|-----|-----|-----|-----|-----|-----|-----|-----|-----|-----|-----|-----|-----|-----|-----|-----|-----|-----|-----|-----|-----|-----|-----|-----|-----|-----|-----|-----|-----|-----|-----|-----|-----|-----|-----|-----|-----|-----|-----|-----|-----|-----|-----|-----|-----|-----|-----|-----|---|
| Delta-latroinsectotoxin-L1a Q25338     | <i>L. redecingutatus</i> | [1]        | A   | L   | L   | N   | H   | P   | D   | T   | D   | K   | N   | A   | Q   | S   | T   | S   | -   | I   | E   | K   | G   | A   | D   | I   | E   | A   | K   | F   | D   | S   | D   | R   | S   | V   | M   | H   | A   | A   | V   | A   | Y   | R   | G   | N   | N   | K   | I   | A   | L   | R   | F |
| Delta-latroinsectotoxin-XP_015914373.1 | <i>P. tepidariorum</i>   | /          | A   | L   | L   | N   | H   | P   | D   | T   | D   | K   | N   | A   | Q   | S   | T   | S   | -   | I   | E   | K   | G   | A   | D   | I   | E   | A   | K   | F   | D   | S   | D   | R   | S   | V   | M   | H   | A   | A   | V   | A   | Y   | R   | G   | N   | N   | K   | I   | A   | L   | R   | F |
| Delta-latroinsectotoxin-Sno1a          | <i>S. nobilis</i>        | This study | A   | L   | L   | E   | H   | N   | K   | I   | N   | I   | T   | A   | K   | S   | K   | T   | G   | L   | T   | P   | F   | H   | L   | A   | V   | M   | K   | E   | N   | M   | R   | V   | V   | R   | L   | F   | E   | M   | H   | Q   | D   | -   | D   | L   | N   | I   | A   | D   | N   | N   |   |
| Delta-latroinsectotoxin-Sno1b          | <i>S. nobilis</i>        | This study | A   | M   | L   | Q   | N   | K   | D   | I   | D   | K   | N   | A   | Q   | S   | D   | T   | G   | L   | T   | P   | F   | H   | L   | A   | I   | I   | N   | E   | N   | K   | E   | V   | A   | E   | S   | L   | V   | E   | Y   | N   | A   | -   | D   | D   | V   | N   | A   | Q   | D   | F   | N |
| Delta-latroinsectotoxin-Sno1c          | <i>S. nobilis</i>        | This study | A   | M   | L   | Q   | N   | K   | D   | I   | D   | K   | N   | A   | Q   | S   | D   | T   | G   | L   | T   | P   | F   | H   | L   | A   | I   | I   | N   | E   | N   | K   | E   | V   | A   | E   | S   | L   | V   | E   | Y   | N   | A   | -   | D   | D   | V   | N   | A   | Q   | D   | F   | N |
| Delta-latroinsectotoxin-Sno1d          | <i>S. nobilis</i>        | This study | P   | L   | L   | E   | H   | P   | D   | I   | D   | V   | N   | A   | K   | S   | E   | N   | G   | L   | T   | P   | F   | H   | L   | A   | V   | I   | K   | N   | N   | L   | T   | I   | T   | K   | A   | L   | I   | G   | E   | A   | -   | D   | I   | N   | S   | E   | R   | I   | D   |     |   |
| Delta-latroinsectotoxin-Sno1e          | <i>S. nobilis</i>        | This study | V   | L   | M   | K   | K   | E   | D   | L   | D   | V   | N   | A   | K   | S   | E   | N   | G   | L   | T   | P   | F   | H   | L   | A   | V   | I   | M   | N   | G   | D   | I   | E   | V   | A   | Q   | I   | L   | V   | K   | S   | Q   | -   | D   | I   | N   | A   | R   | D   | I   | N   |   |

| IDENTIFICATION | SPECIES | REF | 651 | 652 | 653 | 654 |  |
|----------------|---------|-----|-----|-----|-----|-----|--|
|----------------|---------|-----|-----|-----|-----|-----|--|



**Supplementary dataset 2 – Table 4c- Delta-Latroinsectotoxins- Sequences from position 801 to 1176:** Sequence alignments of the closest two delta-latroinsectotoxins already published and the five most abundant found in the venom of *Steatoda nobilis*. Yellow windows indicate positions where the identity and/or the physico-chemical properties of the aminoacids is maintained at least for 4 possibilities over 7, bold positions are the ones where the positions are maintained 2 or 3 times (over 7). Cysteines are highlighted in red.

| IDENTIFICATION                        |  | SPECIES                  | REF        | 801 | 802 | 803 | 804 | 805 | 806 | 807 | 808 | 809 | 810 | 811 | 812 | 813 | 814 | 815 | 816 | 817 | 818 | 819 | 820 | 821 | 822 | 823 | 824 | 825 | 826 | 827 | 828 | 829 | 830 | 831 | 832 | 833 | 834 | 835 | 836 | 837 | 838 | 839 | 840 | 841 | 842 | 843 | 844 | 845 | 846 | 847 | 848 | 849 | 850 |   |   |
|---------------------------------------|--|--------------------------|------------|-----|-----|-----|-----|-----|-----|-----|-----|-----|-----|-----|-----|-----|-----|-----|-----|-----|-----|-----|-----|-----|-----|-----|-----|-----|-----|-----|-----|-----|-----|-----|-----|-----|-----|-----|-----|-----|-----|-----|-----|-----|-----|-----|-----|-----|-----|-----|-----|-----|-----|---|---|
| Delta-larotransectoxin-Lt1a Q25338    |  | <i>L. ledecingutatus</i> | [1]        | P   | L   | H   | S   | A   | A   | K   | I   | G   | R   | K   | S   | T   | V   | L   | Y   | L   | L   | E   | K   | G   | A   | D   | I   | G   | A   | K   | T   | A   | D   | G   | S   | T   | A   | L   | H   | L   | A   | V   | S   | G   | R   | K   | M   | K   | T   | V   | E   | T   | L   |   |   |
| Delta-larotransectoxin-XP_015914373.1 |  | <i>P. lepidarium</i>     | /          | L   | N   | K   | G   | A   | N   | L   | K   | E   | Y   | D   | N   | N   | K   | Y   | L   | P   | I   | H   | K   | A   | I   | T   | V   | L   | Y   | L   | L   | E   | K   | G   | A   | D   | I   | G   | A   | K   | T   | A   | D   | G   | S   | T   | A   | L   | H   | L   | A   | V   | S   |   |   |
| Delta-larotransectoxin-Sno1a          |  | <i>S. nobilis</i>        | This study | P   | L   | H   | L   | A   | A   | S   | -   | -   | -   | -   | -   | -   | -   | -   | -   | -   | -   | -   | -   | -   | -   | -   | -   | -   | -   | -   | -   | -   | -   | -   | -   | -   | -   | -   | -   | -   | -   | -   | -   | -   | -   | -   | -   | -   | -   | -   | -   | -   | -   |   |   |
| Delta-larotransectoxin-Sno1b          |  | <i>S. nobilis</i>        | This study | P   | L   | H   | L   | A   | A   | K   | A   | K   | A   | G   | R   | K   | T   | L   | L   | N   | L   | L   | E   | K   | G   | A   | D   | I   | E   | A   | K   | T   | E   | D   | G   | S   | T   | A   | L   | H   | I   | A   | A   | S   | G   | R   | K   | I   | N   | T   | V   | K   | A   | L |   |
| Delta-larotransectoxin-Sno1c          |  | <i>S. nobilis</i>        | This study | P   | L   | H   | L   | A   | A   | K   | A   | K   | A   | G   | R   | K   | T   | L   | L   | N   | L   | L   | E   | K   | G   | A   | D   | I   | E   | A   | K   | T   | E   | D   | G   | S   | T   | A   | L   | H   | I   | A   | A   | S   | G   | R   | K   | I   | N   | T   | V   | K   | A   | L |   |
| Delta-larotransectoxin-Sno1d          |  | <i>S. nobilis</i>        | This study | P   | L   | H   | L   | F   | A   | A   | T   | R   | H   | G   | R   | I   | N   | T   | L   | L   | N   | L   | L   | E   | K   | G   | A   | D   | I   | S   | A   | K   | T   | S   | D   | G   | S   | T   | A   | L   | H   | I   | A   | V   | E   | F   | K   | L   | L   | D   | V   | R   | K   | A | L |
| Delta-larotransectoxin-Sno1e          |  | <i>S. nobilis</i>        | This study | P   | L   | H   | L   | A   | A   | K   | T   | -   | -   | -   | -   | -   | -   | -   | -   | -   | -   | -   | -   | -   | -   | -   | -   | -   | -   | -   | -   | -   | -   | -   | -   | -   | -   | -   | -   | -   | -   | -   | -   | -   | -   | -   | -   | -   | -   | -   | -   | -   | -   | - |   |

| IDENTIFICATION                        |  | SPECIES                  | REF        | 851 | 852 | 853 | 854 | 855 | 856 | 857 | 858 | 859 | 860 | 861 | 862 | 863 | 864 | 865 | 866 | 867 | 868 | 869 | 870 | 871 | 872 | 873 | 874 | 875 | 876 | 877 | 878 | 879 | 880 | 881 | 882 | 883 | 884 | 885 | 886 | 887 | 888 | 889 | 890 | 891 | 892 | 893 | 894 | 895 | 896 | 897 | 898 | 899 | 900 |   |   |
|---------------------------------------|--|--------------------------|------------|-----|-----|-----|-----|-----|-----|-----|-----|-----|-----|-----|-----|-----|-----|-----|-----|-----|-----|-----|-----|-----|-----|-----|-----|-----|-----|-----|-----|-----|-----|-----|-----|-----|-----|-----|-----|-----|-----|-----|-----|-----|-----|-----|-----|-----|-----|-----|-----|-----|-----|---|---|
| Delta-larotransectoxin-Lt1a Q25338    |  | <i>L. ledecingutatus</i> | [1]        | L   | N   | K   | G   | A   | N   | L   | K   | E   | Y   | D   | N   | N   | K   | Y   | L   | P   | I   | H   | K   | A   | I   | T   | V   | L   | Y   | L   | L   | E   | K   | G   | A   | D   | I   | G   | A   | K   | T   | A   | D   | G   | S   | T   | A   | L   | H   | L   | A   | V   | S   |   |   |
| Delta-larotransectoxin-XP_015914373.1 |  | <i>P. lepidarium</i>     | /          | L   | N   | K   | G   | A   | D   | S   | R   | S   | V   | D   | H   | N   | N   | L   | L   | P   | I   | Q   | I   | A   | I   | -   | -   | -   | -   | -   | -   | -   | -   | -   | -   | -   | -   | -   | -   | -   | -   | -   | -   | -   | -   | -   | -   | -   | -   | -   | -   | -   | -   | - |   |
| Delta-larotransectoxin-Sno1a          |  | <i>S. nobilis</i>        | This study | L   | A   | E   | K   | A   | T   | L   | L   | K   | Y   | D   | I   | H   | G   | Y   | L   | T   | P   | A   | N   | Y   | A   | A   | -   | -   | -   | -   | -   | -   | -   | -   | -   | -   | -   | -   | -   | -   | -   | -   | -   | -   | -   | -   | -   | -   | -   | -   | -   | -   | -   | - | - |
| Delta-larotransectoxin-Sno1b          |  | <i>S. nobilis</i>        | This study | L   | S   | A   | K   | G   | A   | N   | L   | K   | E   | F   | D   | N   | H   | K   | Y   | L   | P   | F   | H   | K   | A   | I   | T   | L   | N   | L   | L   | E   | K   | G   | A   | D   | I   | E   | A   | K   | T   | E   | D   | G   | S   | T   | A   | L   | H   | I   | A   | A   | S   |   |   |
| Delta-larotransectoxin-Sno1c          |  | <i>S. nobilis</i>        | This study | L   | S   | K   | G   | A   | N   | A   | K   | E   | Y   | D   | D   | N   | G   | Y   | L   | P   | I   | H   | K   | A   | I   | T   | L   | L   | Y   | L   | L   | E   | K   | G   | A   | D   | I   | S   | A   | K   | T   | S   | D   | G   | S   | T   | A   | L   | H   | I   | A   | V   | E   |   |   |
| Delta-larotransectoxin-Sno1d          |  | <i>S. nobilis</i>        | This study | L   | G   | K   | G   | A   | D   | V   | K   | A   | T   | D   | D   | N   | N   | Y   | L   | P   | I   | H   | K   | A   | M   | T   | L   | L   | L   | E   | L   | I   | D   | K   | G   | A   | D   | M   | S   | S   | K   | T   | P   | D   | G   | S   | T   | P   | L   | H   | L   | A   | V   | D |   |

| IDENTIFICATION                        |  | SPECIES                  | REF        | 901 | 902 | 903 | 904 | 905 | 906 | 907 | 908 | 909 | 910 | 911 | 912 | 913 | 914 | 915 | 916 | 917 | 918 | 919 | 920 | 921 | 922 | 923 | 924 | 925 | 926 | 927 | 928 | 929 | 930 | 931 | 932 | 933 | 934 | 935 | 936 | 937 | 938 | 939 | 940 | 941 | 942 | 943 | 944 | 945 | 946 | 947 | 948 | 949 | 950 |   |   |   |   |
|---------------------------------------|--|--------------------------|------------|-----|-----|-----|-----|-----|-----|-----|-----|-----|-----|-----|-----|-----|-----|-----|-----|-----|-----|-----|-----|-----|-----|-----|-----|-----|-----|-----|-----|-----|-----|-----|-----|-----|-----|-----|-----|-----|-----|-----|-----|-----|-----|-----|-----|-----|-----|-----|-----|-----|-----|---|---|---|---|
| Delta-larotransectoxin-Lt1a Q25338    |  | <i>L. ledecingutatus</i> | [1]        | G   | R   | K   | M   | K   | T   | V   | E   | T   | L   | N   | L   | K   | G   | A   | N   | L   | K   | E   | Y   | D   | N   | N   | K   | Y   | L   | P   | I   | H   | K   | A   | I   | I   | N   | D   | D   | D   | L   | D   | M   | V   | R   | L   | F   | L   | E   | K   | D   | P   | S   | L |   |   |   |
| Delta-larotransectoxin-XP_015914373.1 |  | <i>P. lepidarium</i>     | /          | A   | E   | R   | I   | E   | T   | L   | T   | N   | L   | N   | K   | G   | A   | D   | S   | L   | R   | S   | V   | D   | H   | N   | N   | L   | L   | P   | I   | Q   | I   | A   | A   | I   | Q   | N   | Y   | N   | T   | D   | D   | I   | I   | R   | K   | L   | F   | F   | M   | N   | H   | D | R | I | L |
| Delta-larotransectoxin-Sno1a          |  | <i>S. nobilis</i>        | This study | R   | Q   | A   | K   | D   | A   | D   | L   | L   | A   | E   | K   | G   | A   | D   | S   | L   | K   | E   | F   | D   | N   | H   | G   | Y   | L   | P   | I   | N   | Y   | A   | A   | K   | N   | I   | V   | M   | M   | M   | K   | L   | F   | V   | T   | Y   | T   | P   | K   | Q   |     |   |   |   |   |
| Delta-larotransectoxin-Sno1b          |  | <i>S. nobilis</i>        | This study | G   | R   | K   | I   | N   | T   | V   | K   | A   | A   | L   | L   | S   | K   | G   | A   | N   | L   | K   | E   | F   | D   | N   | N   | K   | Y   | L   | P   | F   | H   | K   | A   | I   | I   | N   | E   | D   | K   | D   | M   | M   | R   | L   | F   | I   | E   | K   | D   | A   | S   | L |   |   |   |
| Delta-larotransectoxin-Sno1c          |  | <i>S. nobilis</i>        | This study | G   | R   | K   | I   | N   | T   | V   | K   | A   | A   | L   | L   | S   | K   | G   | A   | N   | L   | K   | E   | F   | D   | N   | N   | K   | Y   | L   | P   | F   | H   | K   | A   | I   | I   | N   | E   | D   | K   | D   | M   | M   | R   | L   | F   | I   | E   | K   | D   | A   | S   | L |   |   |   |
| Delta-larotransectoxin-Sno1d          |  | <i>S. nobilis</i>        | This study | F   | K   | L   | L   | D   | A   | V   | K   | A   | L   | L   | S   | K   | G   | A   | N   | A   | K   | E   | Y   | D   | D   | N   | G   | Y   | L   | P   | I   | H   | K   | A   | M   | L   | E   | N   | E   | I   | D   | I   | V   | K   | A   | V   | I   | E   | H   | D   | H   | S   | L   |   |   |   |   |
| Delta-larotransectoxin-Sno1e          |  | <i>S. nobilis</i>        | This study | N   | Q   | O   | Q   | L   | D   | T   | V   | K   | A   | L   | L   | G   | K   | G   | A   | D   | V   | K   | A   | T   | D   | D   | N   | N   | Y   | L   | P   | I   | H   | K   | A   | M   | L   | E   | N   | D   | A   | E   | I   | V   | R   | M   | L   | V   | K   | H   | D   | H   | S   | L |   |   |   |

| IDENTIFICATION                        |  | SPECIES                  | REF        | 951 | 952 | 953 | 954 | 955 | 956 | 957 | 958 | 959 | 960 | 961 | 962 | 963 | 964 | 965 | 966 | 967 | 968 | 969 | 970 | 971 | 972 | 973 | 974 | 975 | 976 | 977 | 978 | 979 | 980 | 981 | 982 | 983 | 984 | 985 | 986 | 987 | 988 | 989 | 990 | 991 | 992 | 993 | 994 | 995 | 996 | 997 | 998 | 999 | 1000 |   |
|---------------------------------------|--|--------------------------|------------|-----|-----|-----|-----|-----|-----|-----|-----|-----|-----|-----|-----|-----|-----|-----|-----|-----|-----|-----|-----|-----|-----|-----|-----|-----|-----|-----|-----|-----|-----|-----|-----|-----|-----|-----|-----|-----|-----|-----|-----|-----|-----|-----|-----|-----|-----|-----|-----|-----|------|---|
| Delta-larotransectoxin-Lt1a Q25338    |  | <i>L. ledecingutatus</i> | [1]        | K   | D   | D   | E   | T   | E   | E   | G   | R   | T   | -   | -   | -   | S   | I   | M   | L   | I   | V   | Q   | K   | L   | L   | L   | E   | L   | Y   | N   | Y   | F   | I   | N   | N   | K   | D   | N   | Y   | A   | E   | T   | L   | D   | -   | -   | E   | E   | A   | L   | F   | N    | R |
| Delta-larotransectoxin-XP_015914373.1 |  | <i>P. lepidarium</i>     | /          | M   | N   | P   | K   | T   | E   | E   | G   | F   | L   | I   | H   | N   | N   | K   | I   | S   | F   | T   | M   | L   | L   | V   | R   | Y   | H   | Y   | F   | I   | N   | N   | K   | D   | D   | D   | D   | P   | E   | Y   | Q   | E   | F   | R   | D   | M   | T   | P   | Y   | Q   | K    | R |
| Delta-larotransectoxin-Sno1a          |  | <i>S. nobilis</i>        | This study | M   | N   | P   | K   | T   | E   | E   | G   | F   | L   | I   | H   | N   | N   | K   | I   | S   | F   | T   | M   | L   | L   | V   | R   | Y   | H   | Y   | F   | I   | N   | N   | K   | D   | D   | D   | D   | P   | E   | Y   | Q   | E   | F   | R   | D   | M   | T   | P   | Y   | Q   | K    | R |
| Delta-larotransectoxin-Sno1b          |  | <i>S. nobilis</i>        | This study | S   | K   | D   | D   | T   | E   | E   | G   | R   | T   | -   | -   | -   | S   | A   | K   | L   | I   | M   | Q   | K   | I   | M   | V   | V   | F   | L   | N   | H   | F   | I   | N   | T   | Y   | D   | E   | T   | E   | S   | -   | -   | -   | -   | -   | -   | -   | -   | -   | -   | -    | - |
| Delta-larotransectoxin-Sno1c          |  | <i>S. nobilis</i>        | This study | T   | N   | D   | N   | T   | E   | E   | G   | R   | T   | -   | -   | -   | S   | T   | I   | L   | I   | V   | Q   | K   | L   | V   | V   | S   | I   | Y   | N   | H   | F   | I   | N   | T   | Y   | D   | E   | T   | E   | S   | -   | -   | -   | -   | -   | -   | -   | -   | -   | -   | -    | - |
| Delta-larotransectoxin-Sno1d          |  | <i>S. nobilis</i>        | This study | D   | N   | E   | D   | S   | E   | E   | G   | R   | T   | -   | -   | -   | S   | T   | I   | L   | I   | V   | Q   | K   | L   | V   | V   | S   | I   | Y   | N   | H   | F   | I   | N   | T   | Y   | D   | E   | T   | E   | S   | -   | -   | -   | -   | -   | -   | -   | -   | -   | -   | -    | - |
| Delta-larotransectoxin-Sno1e          |  | <i>S. nobilis</i>        | This study | I   | D   | D   | S   | V   | E   | N   | A   | Q   | S   | -   | -   | -   | S   | L   | Q   | L   | I   | I   | D   | I   | L   | M   | K   | D   | I   | Y   | N   | Y   | Y   | I   | N   | N   | Y   | D   | E   | T   | Q   | G   | -   | -   | -   | -   | -   | -   | -   | -   | -   | -   | -    | - |

| IDENTIFICATION                        |  | SPECIES                  | REF        | 1001 | 1002 | 1003 | 1004 | 1005 | 1006 | 1007 | 1008 | 1009 | 1010 | 1011 | 1012 | 1013 | 1014 | 1015 | 1016 | 1017 | 1018 | 1019 | 1020 | 1021 | 1022 | 1023 | 1024 | 1025 | 1026 | 1027 | 1028 | 1029 | 1030 | 1031 | 1032 | 1033 | 1034 | 1035 | 1036 | 1037 | 1038 | 1039 | 1040 | 1041 | 1042 | 1043 | 1044 | 1045 | 1046 | 1047 | 1048 | 1049 | 1050 |   |   |
|---------------------------------------|--|--------------------------|------------|------|------|------|------|------|------|------|------|------|------|------|------|------|------|------|------|------|------|------|------|------|------|------|------|------|------|------|------|------|------|------|------|------|------|------|------|------|------|------|------|------|------|------|------|------|------|------|------|------|------|---|---|
| Delta-larotransectoxin-Lt1a Q25338    |  | <i>L. ledecingutatus</i> | [1]        | L    | D    | E    | Q    | G    | K    | L    | E    | L    | A    | Y    | I    | F    | H    | N    | K    | E    | G    | D    | A    | K    | E    | -    | -    | -    | -    | -    | -    | A    | V    | K    | P    | T    | I    | O    | L    | L    | K    | M    | E    | Y    | C    | L    | K    | L    | E    | R    | E    | L    |      |   |   |
| Delta-larotransectoxin-XP_015914373.1 |  | <i>P. lepidarium</i>     | /          | L    | D    | E    | Q    | G    | K    | L    | E    | L    | A    | Y    | I    | F    | H    | N    | K    | E    | G    | D    | A    | K    | E    | -    | -    | -    | -    | -    | -    | A    | V    | K    | P    | T    | I    | O    | L    | L    | K    | M    | E    | Y    | C    | L    | K    | L    | E    | R    | E    | L    |      |   |   |
| Delta-larotransectoxin-Sno1a          |  | <i>S. nobilis</i>        | This study | L    | E    | N    | E    | Q    | G    | I    | L    | D    | M    | Y    | Y    | V    | L    | G    | E    | G    | S    | R    | D    | L    | S    | S    | N    | D    | L    | K    | K    | Y    | A    | Y    | Q    | L    | M    | L    | T    | V    | F    | V    | K    | I    | I    | R    | K    | C    | F    | S    | Y    | L    | S    | K | A |
| Delta-larotransectoxin-Sno1b          |  | <i>S. nobilis</i>        | This study | F    | H    | E    | N    | Q    | G    | K    | L    | E    | L    | A    | Y    | T    | F    | T    | N    | K    | P    | N    | S    | K    | E    | -    | -    | -    | -    | -    | E    | F    | K    | T    | A    | F    | L    | -    | F    | M    | A    | A    | V    | V    | K    | H    | C    | L    | E    | E    | K    | R    | L    | A |   |
| Delta-larotransectoxin-Sno1c          |  | <i>S. nobilis</i>        | This study | F    | H    | E    | N    | Q    | G    | K    | L    | E    | L    | A    | Y    | T    | F    | T    | N    | K    | P    | N    | S    | K    | E    | -    | -    | -    | -    | -    | E    | F    | K    | T    | A    | F    | L    | -    | F    | M    | A    | A    | V    | V    | K    | H    | C    | L    | E    | E    | K    | R    | L    | A |   |
| Delta-larotransectoxin-Sno1d          |  | <i>S. nobilis</i>        | This study | M    | E    | E    | N    | N    | K    | F    | R    | -    | -    | -    | -    | -    | -    | -    | -    | -    | -    | -    | -    | -    | -    | -    | -    | -    | -    | -    | -    | -    | -    | -    | -    | -    | -    | -    | -    | -    | -    | -    | -    | -    | -    | -    | -    | -    | -    | -    | -    | -    | -    | - |   |
| Delta-larotransectoxin-Sno1e          |  | <i>S. nobilis</i>        | This study | F    | S    | E    | E    | N    | G    | K    | L    | D    | V    | A    | F    | I    | F    | N    | A    | S    | E    | D    | S    | K    | -    | K    | -    | -    | -    | -    | -    | -    | -    | -    | -    | -    | -    | -    | -    | -    | -    | -    | -</  |      |      |      |      |      |      |      |      |      |      |   |   |
