# Supplementary material for: Venomics Approach Reveals a High Proportion of Lactrodectus-Like Toxins in the Venom of the Noble False Widow Spider Steatoda nobilis
Source: MDPI journal article supplement (doi:10.3390/toxins12060402), 2020-06-18
Supplement: s1 [file s1]

| GO ID      | GO term                                                        | Ontology Type | Number of Genes | Number of Genes in background | P value  | False Discovery Rate |
|------------|----------------------------------------------------------------|---------------|-----------------|-------------------------------|----------|----------------------|
| GO:0003735 | structural constituent of ribosome                             | MF            | 74              | 152                           | 1.00E-46 | 1.86E-42             |
| GO:0005840 | ribosome                                                       | CC            | 68              | 145                           | 1.22E-41 | 1.13E-37             |
| GO:0043043 | peptide biosynthetic process                                   | BP            | 74              | 190                           | 2.20E-38 | 1.36E-34             |
| GO:0006412 | translation                                                    | BP            | 72              | 181                           | 4.28E-38 | 1.98E-34             |
| GO:0006518 | peptide metabolic process                                      | BP            | 82              | 268                           | 1.56E-33 | 4.94E-30             |
| GO:0043604 | amide biosynthetic process                                     | BP            | 75              | 225                           | 1.60E-33 | 4.94E-30             |
| GO:0044218 | other organism cell membrane                                   | CC            | 52              | 109                           | 1.58E-32 | 3.67E-29             |
| GO:0044279 | other organism membrane                                        | CC            | 52              | 109                           | 1.58E-32 | 3.67E-29             |
| GO:0044445 | cytosolic part                                                 | CC            | 59              | 146                           | 8.02E-32 | 1.65E-28             |
| GO:0022625 | cytosolic large ribosomal subunit                              | CC            | 28              | 32                            | 2.02E-29 | 3.74E-26             |
| GO:0044391 | ribosomal subunit                                              | CC            | 56              | 146                           | 7.35E-29 | 1.24E-25             |
| GO:0090729 | toxin activity                                                 | MF            | 57              | 154                           | 2.09E-28 | 3.23E-25             |
| GO:0043603 | cellular amide metabolic process                               | BP            | 88              | 357                           | 3.27E-28 | 4.66E-25             |
| GO:0005198 | structural molecule activity                                   | MF            | 97              | 459                           | 1.73E-25 | 2.29E-22             |
| GO:0044217 | other organism part                                            | CC            | 53              | 169                           | 1.42E-22 | 1.75E-19             |
| GO:1901566 | organonitrogen compound biosynthetic process                   | BP            | 105             | 594                           | 3.58E-21 | 4.14E-18             |
| GO:0022627 | cytosolic small ribosomal subunit                              | CC            | 19              | 22                            | 4.52E-20 | 4.94E-17             |
| GO:0005622 | intracellular                                                  | CC            | 37              | 108                           | 1.40E-17 | 1.45E-14             |
| GO:0015934 | large ribosomal subunit                                        | CC            | 34              | 93                            | 2.92E-17 | 2.85E-14             |
| GO:0002181 | cytoplasmic translation                                        | BP            | 20              | 30                            | 3.59E-17 | 3.33E-14             |
| GO:0006887 | exocytosis                                                     | BP            | 59              | 278                           | 5.51E-16 | 4.64E-13             |
| GO:1990904 | ribonucleoprotein complex                                      | CC            | 109             | 756                           | 2.71E-15 | 2.18E-12             |
| GO:0015935 | small ribosomal subunit                                        | CC            | 23              | 56                            | 2.22E-13 | 1.72E-10             |
| GO:0032940 | secretion by cell                                              | BP            | 65              | 375                           | 4.25E-13 | 3.15E-10             |
| GO:0005576 | extracellular region                                           | CC            | 108             | 813                           | 8.34E-13 | 5.95E-10             |
| GO:0034645 | cellular macromolecule biosynthetic process                    | BP            | 91              | 640                           | 1.38E-12 | 9.49E-10             |
| GO:0044271 | cellular nitrogen compound biosynthetic process                | BP            | 109             | 853                           | 7.48E-12 | 4.95E-09             |
| GO:0015078 | proton transmembrane transporter activity                      | MF            | 23              | 66                            | 1.25E-11 | 7.99E-09             |
| GO:0046903 | secretion                                                      | BP            | 65              | 410                           | 2.41E-11 | 1.49E-08             |
| GO:0015985 | energy coupled proton transport, down electrochemical          | BP            | 11              | 14                            | 3.16E-11 | 1.83E-08             |
| GO:0015986 | ATP synthesis coupled proton transport                         | BP            | 11              | 14                            | 3.16E-11 | 1.83E-08             |
| GO:0006754 | ATP biosynthetic process                                       | BP            | 13              | 22                            | 1.30E-10 | 7.28E-08             |
| GO:0009059 | macromolecule biosynthetic process                             | BP            | 96              | 754                           | 1.73E-10 | 9.42E-08             |
| GO:0009201 | ribonucleoside triphosphate biosynthetic process               | BP            | 15              | 31                            | 2.15E-10 | 1.14E-07             |
| GO:0006457 | protein folding                                                | BP            | 30              | 124                           | 3.61E-10 | 1.86E-07             |
| GO:0009145 | purine nucleoside triphosphate biosynthetic process            | BP            | 14              | 28                            | 4.98E-10 | 2.43E-07             |
| GO:0009206 | purine ribonucleoside triphosphate biosynthetic process        | BP            | 14              | 28                            | 4.98E-10 | 2.43E-07             |
| GO:0010499 | proteasomal ubiquitin-independent protein catabolic process    | BP            | 10              | 14                            | 1.26E-09 | 6.01E-07             |
| GO:0004298 | threonine-type endopeptidase activity                          | MF            | 10              | 15                            | 3.57E-09 | 1.57E-06             |
| GO:0070003 | threonine-type peptidase activity                              | MF            | 10              | 15                            | 3.57E-09 | 1.57E-06             |
| GO:0005839 | proteasome core complex                                        | CC            | 10              | 15                            | 3.57E-09 | 1.57E-06             |
| GO:0009142 | nucleoside triphosphate biosynthetic process                   | BP            | 15              | 37                            | 4.60E-09 | 1.98E-06             |
| GO:0051082 | unfolded protein binding                                       | MF            | 22              | 79                            | 5.07E-09 | 2.13E-06             |
| GO:0005832 | chaperonin-containing T-complex                                | CC            | 7               | 7                             | 5.63E-09 | 2.32E-06             |
| GO:0046034 | ATP metabolic process                                          | BP            | 20              | 67                            | 6.75E-09 | 2.72E-06             |
| GO:0098800 | inner mitochondrial membrane protein complex                   | CC            | 21              | 74                            | 7.79E-09 | 3.07E-06             |
| GO:0005344 | oxygen carrier activity                                        | MF            | 8               | 10                            | 1.48E-08 | 5.73E-06             |
| GO:0009199 | ribonucleoside triphosphate metabolic process                  | BP            | 22              | 85                            | 2.22E-08 | 8.42E-06             |
| GO:0045263 | proton-transporting ATP synthase complex, coupling factor F(o) | CC            | 7               | 8                             | 4.25E-08 | 1.58E-05             |
| GO:0032982 | myosin filament                                                | CC            | 8               | 11                            | 5.12E-08 | 1.84E-05             |
| GO:0019843 | rRNA binding                                                   | MF            | 17              | 55                            | 5.16E-08 | 1.84E-05             |
| GO:0009205 | purine ribonucleoside triphosphate metabolic process           | BP            | 21              | 82                            | 5.67E-08 | 1.98E-05             |
| GO:0000502 | proteasome complex                                             | CC            | 15              | 44                            | 7.27E-08 | 2.40E-05             |
| GO:1902600 | proton transmembrane transport                                 | BP            | 16              | 50                            | 7.38E-08 | 2.40E-05             |
| GO:0000276 | mitochondrial proton-transporting ATP synthase complex,        | CC            | 6               | 6                             | 8.52E-08 | 2.73E-05             |
| GO:0098798 | mitochondrial protein complex                                  | CC            | 22              | 92                            | 1.04E-07 | 3.27E-05             |
| GO:0009144 | purine nucleoside triphosphate metabolic process               | BP            | 21              | 86                            | 1.38E-07 | 4.26E-05             |
| GO:1905369 | endopeptidase complex                                          | CC            | 15              | 46                            | 1.43E-07 | 4.34E-05             |
| GO:0004129 | cytochrome-c oxidase activity                                  | MF            | 7               | 9                             | 1.80E-07 | 5.14E-05             |
| GO:0015002 | heme-copper terminal oxidase activity                          | MF            | 7               | 9                             | 1.80E-07 | 5.14E-05             |
| GO:0016675 | oxidoreductase activity, acting on a heme group of donors      | MF            | 7               | 9                             | 1.80E-07 | 5.14E-05             |
| GO:0016676 | oxidoreductase activity, acting on a heme group of donors,     | MF            | 7               | 9                             | 1.80E-07 | 5.14E-05             |
| GO:0009141 | nucleoside triphosphate metabolic process                      | BP            | 22              | 98                            | 3.42E-07 | 9.60E-05             |
| GO:0033177 | proton-transporting two-sector ATPase complex, proton-         | CC            | 9               | 17                            | 3.66E-07 | 0.000101328          |
| GO:0044455 | mitochondrial membrane part                                    | CC            | 27              | 142                           | 5.97E-07 | 0.000162688          |

|            |                                                                 |    |     |      |             |             |
|------------|-----------------------------------------------------------------|----|-----|------|-------------|-------------|
| GO:0009127 | purine nucleoside monophosphate biosynthetic process            | BP | 14  | 45   | 7.16E-07    | 0.000189593 |
| GO:0009168 | purine ribonucleoside monophosphate biosynthetic process        | BP | 14  | 45   | 7.16E-07    | 0.000189593 |
| GO:0009126 | purine nucleoside monophosphate metabolic process               | BP | 21  | 95   | 8.26E-07    | 0.000212751 |
| GO:0009167 | purine ribonucleoside monophosphate metabolic process           | BP | 21  | 95   | 8.26E-07    | 0.000212751 |
| GO:0009161 | ribonucleoside monophosphate metabolic process                  | BP | 22  | 105  | 1.20E-06    | 0.000304572 |
| GO:0005753 | mitochondrial proton-transporting ATP synthase complex          | CC | 5   | 5    | 1.29E-06    | 0.000314388 |
| GO:0045259 | proton-transporting ATP synthase complex                        | CC | 5   | 5    | 1.29E-06    | 0.000314388 |
| GO:0098556 | cytoplasmic side of rough endoplasmic reticulum membrane        | CC | 5   | 5    | 1.29E-06    | 0.000314388 |
| GO:0042788 | polysomal ribosome                                              | CC | 7   | 11   | 1.47E-06    | 0.000353056 |
| GO:0006613 | cotranslational protein targeting to membrane                   | BP | 8   | 15   | 1.57E-06    | 0.000373195 |
| GO:0005615 | extracellular space                                             | CC | 59  | 474  | 1.88E-06    | 0.000436891 |
| GO:0009156 | ribonucleoside monophosphate biosynthetic process               | BP | 15  | 55   | 1.88E-06    | 0.000436891 |
| GO:0042776 | mitochondrial ATP synthesis coupled proton transport            | BP | 6   | 8    | 2.12E-06    | 0.000486345 |
| GO:0009123 | nucleoside monophosphate metabolic process                      | BP | 22  | 109  | 2.32E-06    | 0.000525352 |
| GO:0031404 | chloride ion binding                                            | MF | 8   | 16   | 2.96E-06    | 0.00066052  |
| GO:0101031 | chaperone complex                                               | CC | 7   | 12   | 3.32E-06    | 0.000732018 |
| GO:0045047 | protein targeting to ER                                         | BP | 9   | 21   | 3.47E-06    | 0.000755804 |
| GO:1905368 | peptidase complex                                               | CC | 17  | 72   | 3.51E-06    | 0.000755804 |
| GO:0030018 | Z disc                                                          | CC | 18  | 80   | 3.82E-06    | 0.000813249 |
| GO:0009124 | nucleoside monophosphate biosynthetic process                   | BP | 15  | 59   | 4.92E-06    | 0.001036177 |
| GO:0006614 | SRP-dependent cotranslational protein targeting to membrane     | BP | 7   | 13   | 6.77E-06    | 0.001410863 |
| GO:0070203 | regulation of establishment of protein localization to telomere | BP | 5   | 6    | 7.30E-06    | 0.001456525 |
| GO:1904851 | positive regulation of establishment of protein localization to | BP | 5   | 6    | 7.30E-06    | 0.001456525 |
| GO:0045277 | respiratory chain complex IV                                    | CC | 5   | 6    | 7.30E-06    | 0.001456525 |
| GO:0098554 | cytoplasmic side of endoplasmic reticulum membrane              | CC | 5   | 6    | 7.30E-06    | 0.001456525 |
| GO:0016459 | myosin complex                                                  | CC | 13  | 47   | 7.71E-06    | 0.001520034 |
| GO:0098796 | membrane protein complex                                        | CC | 49  | 388  | 1.02E-05    | 0.001985359 |
| GO:0016460 | myosin II complex                                               | CC | 7   | 14   | 1.28E-05    | 0.002461206 |
| GO:0072599 | establishment of protein localization to endoplasmic reticulum  | BP | 9   | 24   | 1.29E-05    | 0.002461206 |
| GO:0006413 | translational initiation                                        | BP | 12  | 44   | 2.02E-05    | 0.003814691 |
| GO:0070202 | regulation of establishment of protein localization to          | BP | 5   | 7    | 2.42E-05    | 0.004349524 |
| GO:1904816 | positive regulation of protein localization to chromosome,      | BP | 5   | 7    | 2.42E-05    | 0.004349524 |
| GO:0046933 | proton-transporting ATP synthase activity, rotational           | MF | 5   | 7    | 2.42E-05    | 0.004349524 |
| GO:0019773 | proteasome core complex, alpha-subunit complex                  | CC | 5   | 7    | 2.42E-05    | 0.004349524 |
| GO:0019774 | proteasome core complex, beta-subunit complex                   | CC | 5   | 7    | 2.42E-05    | 0.004349524 |
| GO:0035036 | sperm-egg recognition                                           | BP | 7   | 16   | 3.78E-05    | 0.006741375 |
| GO:0019829 | cation-transporting ATPase activity                             | MF | 11  | 40   | 4.10E-05    | 0.007238682 |
| GO:0009055 | electron transfer activity                                      | MF | 11  | 41   | 5.27E-05    | 0.009216545 |
| GO:0003746 | translation elongation factor activity                          | MF | 7   | 17   | 6.06E-05    | 0.01045382  |
| GO:1904814 | regulation of protein localization to chromosome, telomeric     | BP | 5   | 8    | 6.09E-05    | 0.01045382  |
| GO:0070972 | protein localization to endoplasmic reticulum                   | BP | 10  | 35   | 6.41E-05    | 0.010900332 |
| GO:0072594 | establishment of protein localization to organelle              | BP | 28  | 192  | 6.99E-05    | 0.01178527  |
| GO:0007339 | binding of sperm to zona pellucida                              | BP | 6   | 13   | 9.74E-05    | 0.016272773 |
| GO:0008135 | translation factor activity, RNA binding                        | MF | 15  | 75   | 0.000103351 | 0.017111953 |
| GO:0032991 | protein-containing complex                                      | CC | 280 | 3491 | 0.000112965 | 0.018538297 |
| GO:0042625 | ATPase coupled ion transmembrane transporter activity           | MF | 11  | 45   | 0.000132478 | 0.021362303 |
| GO:0098803 | respiratory chain complex                                       | CC | 11  | 45   | 0.000132478 | 0.021362303 |
| GO:0009988 | cell-cell recognition                                           | BP | 7   | 19   | 0.000139545 | 0.022117356 |
| GO:0022626 | cytosolic ribosome                                              | CC | 7   | 19   | 0.000139545 | 0.022117356 |
| GO:0044449 | contractile fiber part                                          | CC | 24  | 160  | 0.00014504  | 0.022793415 |
| GO:1901576 | organic substance biosynthetic process                          | BP | 136 | 1523 | 0.000156796 | 0.024433796 |
| GO:0003729 | mRNA binding                                                    | MF | 27  | 191  | 0.000159352 | 0.0246252   |
| GO:0042470 | melanosome                                                      | CC | 14  | 71   | 0.000204214 | 0.031297076 |
| GO:0044249 | cellular biosynthetic process                                   | BP | 129 | 1443 | 0.000226207 | 0.034383472 |
| GO:0022624 | proteasome accessory complex                                    | CC | 5   | 10   | 0.000244757 | 0.03612846  |
| GO:0008250 | oligosaccharyltransferase complex                               | CC | 5   | 10   | 0.000244757 | 0.03612846  |
| GO:0000028 | ribosomal small subunit assembly                                | BP | 5   | 10   | 0.000244757 | 0.03612846  |
| GO:0045214 | sarcomere organization                                          | BP | 11  | 48   | 0.00024548  | 0.03612846  |
| GO:2001242 | regulation of intrinsic apoptotic signaling pathway             | BP | 13  | 64   | 0.000250957 | 0.036643694 |
| GO:0050821 | protein stabilization                                           | BP | 17  | 99   | 0.000261605 | 0.037624071 |
| GO:0001178 | regulation of transcriptional start site selection at RNA       | BP | 4   | 6    | 0.000261729 | 0.037624071 |
| GO:0048770 | pigment granule                                                 | CC | 14  | 73   | 0.000277079 | 0.039524254 |
| GO:0044769 | ATPase activity, coupled to transmembrane movement of ions,     | MF | 7   | 21   | 0.000286321 | 0.040223825 |
| GO:0060260 | regulation of transcription initiation from RNA polymerase II   | BP | 7   | 21   | 0.000286321 | 0.040223825 |
| GO:0002862 | negative regulation of inflammatory response to antigenic       | BP | 3   | 3    | 0.00029339  | 0.040906882 |
